# Supplementary material for: Decision Support System (DSS) for Fraud Detection in Health Insurance Claims Using Genetic Support Vector Machines (GSVMs)
Source: Hindawi journal article supplement (doi:10.1155/2019/1432597), 2019-09-02
Supplement: f1 [file 1432597.f1.zip]

Archive with 5 entries (5 files):
- 1432597.f1/ReData1_100_1.xlsx
- 1432597.f1/ReData3_500_1.xlsx
- 1432597.f1/ReData300_1.xlsx
- 1432597.f1/ReData4_750_1.xlsx
- 1432597.f1/ReData5_1000.xlsx
