# Supplementary material for: Decision Support System (DSS) for Fraud Detection in Health Insurance Claims Using Genetic Support Vector Machines (GSVMs)
Source: Hindawi journal article supplement (doi:10.1155/2019/1432597), 2019-09-02
Supplement: f1 [file 1432597.f1.zip › 1432597.f1/ReData1_100_1.xlsx]

## Sheet: Sheet1
No.	Attendance Date	Discharge Date	Age	Sex	Folder No	NHIS ID No	Procudure	Diagnosis	G-DRG	ICD10	Service	Medical	Total	Output
1	2013-09-03	2013-09-06	41	M	0019470-13	53038338	LAPORATOMY FOR PERITONITIS	APPENDICITIS	ASUR08A	K35	377.87	57.08	434.95	Legal
2	2013-08-20	2013-08-23	13	M	0016500-13	60232969	APPENDICETOMY	ACUTE APPENDICITIS	ASUR08A	K35	377.87	61.52	439.39	Legal
3	2013-09-02	2013-09-03	15	M	0019209-13	78553524	HERNIORRAPHY	HERNIA	ASUR19A	K44.9	297.6	5.75	303.35	Legal
4	2013-09-03	2013-09-04	39	M	0000231-13	84463698	HERNIORRAPHY	RIGHT INGUINAL HERNIA	ASUR20A	K40	182.39	15.56	197.95	Legal
5	2013-08-29	2013-09-02	45	M	0018536-13	16505017	EXTERNAL HERNIA REPAIR	INGUINAL HERNIA	ASUR20A	K40	212.32	48.54	260.86	Legal
6	2013-09-01	2013-09-03	36	M	0018017-13	77644293	HERNIORRAPHY	INGUINAL HERNIA	ASUR20A	K40	182.39	54.3	236.69	Legal
7	2013-07-18	2013-07-29	74	M	0005172-13	57146908	PROSTATECTOMY	BENIGN PROSTATIC HYPERPLASIA	ASUR28A	D29.1	421.07	92.8	513.87	Legal
8	2013-08-16	2013-09-27	37	M	0015531-13	98054151	INCISION, DRAINAGE AND DEBRIDEMENT	LEG CELLULITIS	ASUR31A	L03	199.88	567.9	767.78	Fraudulent
9	2013-09-06	2013-09-09	31	F	0017974-13	16483332	INCISION, DRAINAGE AND DEBRIDEMENT	WOUND ABSCEDSS	ASUR31A	L02.9	162.4	116.24	278.64	Fraudulent
10	2013-07-15	2013-08-19	66	M	0005778-13	57089945	INCISION, DRAINAGE AND DEBRIDEMENT	CELLULITIS	ASUR31A	L03	199.88	277.34	477.22	Fraudulent
11	2013-07-30	2013-07-31	64	M	0010633-13	60828335	COSERVATIVE MANAGEMENT OF SURGERY	BENIGN PROSTATIC HYPERPLASIA	ASUR34A	D29.1	111.53	20	131.53	Legal
12	2013-09-08	2013-09-20	24	M	0020748-13	98759904	CONSERVATIVE MANAGEMENT OF SURGERY	PEPTIC ULCER DISEASE	ASUR34A	K27	185.5	236.14	421.64	Fraudulent
13	2013-09-06	2013-09-27	70	M	0002821-13	81476799	CONSERVATIVE MANAGEMENT OF SURGERY	ABSCESS OF ANAL RECTAL REGION	ASUR34A	K61	185.5	128.51	314.01	Fraudulent
14	2013-09-01	2013-09-03	19	F	0019179-13	62582114	CONSERVATIVE MANAGEMENT OF SURGERY	RESOLVED OBSTRUCTED UMBILICAL HERNIA	ASUR34A	K42.9	111.53	49.09	160.62	Legal
15	2013-07-29	2013-07-31	37	F	0010137-13	81294051	CONSERVATIVE MANAGEMENT OF SURGERY	PLEURAL EFFUSION	ASUR34A	J90	111.53		111.53	Legal
16	2013-09-17	2013-09-23	73	F	0022819-13	65860430		DIABETES MELLITUS WITH HYPERGLYCAEMIA	MEDI03A	E13.0	215.36	130.34	345.7	Legal
17	2013-08-27	2013-09-06	75	M	0018335-13	16440667		CHRONIC CARDIAC FAILURE	MEDI07A	I50	220.16	7.5	227.66	Legal
18	2013-07-26	2013-07-30	53	M	0009741-13	16463196		CEREBROVASCULAR ACCIDENT	MEDI14A	I67.9	205.71		205.71	Legal
19	2013-09-03	2013-09-05	25	F	0004997-13	16516126		SICKLE CELL DISEASE WITH CRISIS	MEDI16A	D57.0	159.87	31.1	190.97	Fraudulent
20	2013-07-20	2013-07-30	64	M	0007625-13	16386982		CHRONIC KIDNEY DISEASE	MEDI19A	N03	219.91	229.1	449.01	Fraudulent
21	2013-08-22	2013-09-02	32	M	0001406-13	67404459		CHRONIC LIVER DISEASE	MEDI24A	K73	187.53		187.53	Fraudulent
22	2013-08-31	2013-09-03	50	F	0019011-13	68432820		UPPER GASTROINTESTINAL BLEEDING	MEDI25A	K92.2	201.77	60.2	261.97	Fraudulent
23	2013-09-03	2013-09-16	22	M	0019634-13	57732213		MENINGITIS	MEDI30A	G03.9	295.06	145.96	441.02	Fraudulent
24	2013-08-27	2013-09-02	43	M	0019440-13	66899944		CELLULITIS OF LEG	MEDI31A	L03	141.99	55.28	197.27	Fraudulent
25	2013-08-24	2013-09-01	57	F	0017479-13	74873054		HYPERTENSION	MEDI32A	I11	148.2	53.4	201.6	Fraudulent
26	2013-07-05	2013-07-23	65	M	0002764-13	74048589		DEEP VEIN THROMBOSIS	MEDI34A	I82.9	201.9	207.9	409.8	Fraudulent
27	2013-08-28	2013-09-05	41	M	0018494-13	80566659		ALCOHOLISM	MEDI36A	T51	153.06	48.25	201.31	Fraudulent
28	2013-08-27	2013-09-10	34	F	0012846-13	74835837		RETROVIRAL INFECTION	MEDI38A	B20	184.47	19.76	204.23	Legal
29	2013-09-25	2013-09-30	32	M	0001406-13	67404459		GASTRO INTESTINAL TRACT BLLEDING	MEDI25A	K92.2	201.77	57.67	259.44	Fraudulent
30	2013-09-25	2013-09-26	40	F	0024211-13	16401393	EVACUATION OF UTERUS	BLIGHTED OVUM	OBGY06A	OO4	90.19	16.34	106.53	Fraudulent
31	2013-09-19	2013-09-25	18	F	0023190-13	86256440	EXPECTANT MANAGEMENT	HYPEREMESIS IN CYST	OBGY09A	O26.9	70.04	59.35	129.39	Fraudulent
32	2013-09-28	2013-09-02	39	F	0010173-13	79645535	VAGINAL HYSTERECTOMY	UTERINE PROLAPSE	OBGY14A	N84	290.28	120.39	410.67	Fraudulent
33	2013-08-22	2013-09-04	13	F	0017121-13	98333754	COLPOCLEISIS	IMPEFORTED HYMEA	OBGY17A	N81.9	249.81	15.78	265.59	Legal
34	2013-09-20	2013-09-26	24	F	0012900-13	93059986	CAESAREAN SECTION	GROWTH RETARDATION	OBGY32A	O67.9	277.95	91.16	369.11	Fraudulent
35	2013-09-14	2013-09-15	26	F	0013129-13	76209324	SPONTANEUOS VAGINAL DELIVERY	DELIVERY	OBGY34A	O63.1	78.91	14.5	93.41	Fraudulent
36	2013-09-13	2013-09-15	25	F	0022190-13	90140101	SPONTANEUOS VAGINAL DELIVERY	DELIVERY	OBGY34A	O63.1	78.91	6.34	85.25	Legal
37	2013-09-02	2013-09-04	40	F	0003630-13	16460304	CERCLAGE	CERVICAL INCOMPETENCE	OBGY35A	N88.3	191.8	12.3	204.1	Legal
38	2013-08-18	2013-08-24	39	F	0015810-13	93517538	ECLAMPSIA	SEVERE PRE-ECLAMPSIA	OBGY40A	O14.9	161.23	44.11	205.34	Fraudulent
39	2013-08-30	2013-09-12	24	F	0018797-13	85692428	ECLAMPSIA	PRE-ECLAMPSIA	OBGY40A	O14.9	161.23	40.56	201.79	Fraudulent
40	2013-09-05		49	F	19602-13	73224871			OPDC06A		7.92	16.5	24.42	Fraudulent
41	2013-09-09		2	F	21057-13	70019862			OPDC06C		7.75	8	15.75	Fraudulent
42	19/09/2013		25	F	0004531-13	80640994			OPDC02A		15.14	0.6	15.74	Legal
43	19/09/2013		29	F	0065089-13	39945521			OPDC02A		15.14	0.6	15.74	Legal
44	19/09/2013		33	F	445284	98400523			OPDC02A		15.14	1.2	16.34	Legal
45	19/09/2013		36	F	406304	48801460			OPDC02A		15.14	0.9	16.04	Legal
46	19/09/2013		25	F	0014716-13	80572166			OPDC02A		15.14	1.2	16.34	Legal
47	19/09/2013		28	F	445408	63311758			OPDC02A		15.14	1.2	16.34	Legal
48	19/09/2013		32	F	0012389-13	15118853			OPDC02A		15.14	0.9	16.04	Legal
49	19/09/2013		29	F	0006183-13	63829687			OPDC02A		15.14	1.2	16.34	Legal
50	2013-09-16		71	F	2576-13	67148180			OPDC06A		7.92	10.9	18.82	Fraudulent
51	2013-09-16		41	F	2509-13	10254270			OPDC06A		7.92	2.3	10.22	Fraudulent
52	2013-09-16		46	F	2953-13	68911342			OPDC06A		7.92	17.4	25.32	Fraudulent
53	2013-09-16		2	F	2152-13	81528648			OPDC06C		7.75	8	15.75	Fraudulent
54	2013-09-16		1	F	2523-13	83181218			OPDC06C		7.75		7.75	Legal
55	2013-08-05		27	M	0012139-13	93360858	BUNDAGING	FRACTURE OF THE HEAD	ORTH01A		47.85		47.85	Legal
56	2013-08-01		2	M	0011417-13	79468242	BUNDAGING	FRACTURED FEMUR	ORTH01C		44.95		44.95	Legal
57	2013-09-05		27	F	0018470-13	16539749	EXCISION OF SOFT TISSUE	BREAST FIBROADENOMATA	ORTH02A		203.11	11.4	214.51	Legal
58	2013-09-11		28	M	0021638-13	73988925	CLOSED REDUCTION OF FRACTURED SPLINTAGE	FRACTURE RT HUMERUS	ORTH04A		320.84		320.84	Legal
59	2013-09-14		5	F	0018973-13	66853968	WOUND DRESSING	BURNS	ORTH04C		28.13		28.13	Legal
60	2013-08-03		12	M	445737	70765484	CLOSED REDUCTION OF FRACTURE AND SPINTAGE	FRACTURE OF THE LEFT WRIST	ORTH04C		292.21		292.21	Legal
61	2013-09-11		32	M	0021566-13	89307282	DEBRIDEMENT AND SUTURING	MANDIBULAR FRACTURE	ORTH05A		218.04		218.04	Legal
62	2013-08-05		43	M	0011212-13	16437014	DEBRIDEMENT AND SUTURING	LACERATION OF THE LEFT THIGH	ORTH05A		218.04		218.04	Legal
63	2013-08-06		60	F	445753	69617992	DRESSING AND MINOR SUTURING	EXTENSIVE TONGUE LACERATION	ORTH06A		28.13		28.13	Legal
64	2013-09-03		68	M	0019487-13	75258933	EXCISION	PUSTUTE RIGHT FORAM	ORTH07A		133.58		133.58	Legal
65	2013-09-16		36	M	0022326-13	1622115	FASCIOTOMY	BURNS	ORTH09A		389.07	107.08	496.15	Fraudulent
66	2013-08-05		47	M	445749	92868084	INCISION AND DRAINAGE	CELLULITIS OF RIGHT INDEX	ORTH11A		153.67	4.4	158.07	Legal
67	2013-09-15		28	M	0022312-13	85664832	CONSERVATION MANAGEMENT OF HEAD AND SPINAL INJURIES	HEAD INJURY	ORTH24A		162.7		162.7	Legal
68	2013-08-09		17	M	445781	10950615	CONSERVATION MANAGEMENT OF HEAD AND SPINAL INJURIES	HEAD INJURY	ORTH24A		162.7	41.31	204.01	Fraudulent
69	2013-08-28		61	M	446059	91582931	SURGERY FOR REMOVAL OF FINGER	DEBRIDEMENT	ORTH25A		191.52	104.66	296.18	Fraudulent
70	2013-09-09	2013-09-11	4	F	0017233-13	59770788		SICKLE CELL DISEASE WITH CRISIS	PAED24C	D57.0	207.63	57.62	265.25	Fraudulent
71	2013-09-27	2013-09-30	4	F	0017484-13	61070022		SICKLE CELL DISEASE WITH CRISIS	PAED24C	D57.0	207.63	22.42	230.05	Legal
72	2013-09-08	2013-09-10	3	M	0020795-13	82348593		SEVERE MALARIA	PAED37C	B50	163.7	9.06	172.76	Legal
73	2013-09-10	2013-09-12	5	F	0021208-13	75006470		PNEUMONIA	PAED38C	J18.9	159.34	13.45	172.79	Legal
74	2013-08-19	2013-09-11	2	M	0016194-13	86772941		ENTERIC FEVER	PAED38C	A01	224.42	157.45	381.87	Fraudulent
75	2013-09-04	2013-09-11	8	F	0020022-13	64550188		TYPHOID PERFORATION	PAED38C	A01.0	224.42	65.95	290.37	Fraudulent
76	2013-09-22	2013-09-27	4	M	0005873-13	60383281		BRONCHO PNEUMONIA	PAED38C	J18.9	224.42	38.81	263.23	Fraudulent
77	2013-09-02	2013-09-11	7	F	0019346-13	66666368		URINARY TRACT INFECTION	PAED39C	N39.0	91.33	70.44	161.77	Fraudulent
78	2013-07-27	2013-07-30	2	F	0009862-13	74773004	CONSERVATIVE MANAGEMENT OF SURGERY	ACUTE SUPPERATIVE TONSILLITIS	PSUR36C	K65.9	121.78	31.97	153.75	Fraudulent
79	2013-07-22	2013-07-25	2	M	0007969-13	88480493	CONSERVATIVE MANAGEMENT OF SURGERY	ACUTE SUPPERATIVE TONSILLITIS	PSUR36C	K65.9	121.78	32.11	153.89	Fraudulent
80	2013-09-05		18	F	12996-13	76970429			ZOOM02A		11.45	21.76	33.21	Fraudulent
81	2013-09-02		13	M	19186-13	61863826			ZOOM02A		11.45	26.4	37.85	Fraudulent
82	2013-09-11		46	M	21621-13	94406509			ZOOM02A		11.45	16.61	28.06	Fraudulent
83	2013-09-11		47	M	21640-13	90136997			ZOOM02A		11.45	8.28	19.73	Fraudulent
84	2013-09-12		62	F	21436-13	75810933			ZOOM02A		16.13	21.29	37.42	Fraudulent
85	2013-09-12		33	F	21655-13	64217219			ZOOM02A		11.45		11.45	Legal
86	2013-09-12		23	M	21941-13	67272883			ZOOM02A		11.45	9.64	21.09	Fraudulent
87	2013-09-17		5	M	22680-13	39830102			ZOOM02C		10.18		10.18	Legal
88	2013-09-12		4	F	7693-13	58174466			ZOOM02C		10.18	28.5	38.68	Fraudulent
89	2013-09-12		11	M	0306-13	35650637			ZOOM02C		14.25		14.25	Legal
90	2013-08-13	2013-08-16	1	M	0014200-13	83392373		GASTROENTERITIS	PAED31C	A09	112.69	18.04	130.73	Fraudulent
91	2013-07-23	2013-08-19	3	F	0008681-13	63326687		MALNUTRITION	PAED05C	E43	215.78	16.89	232.67	Legal
92	2013-08-16	2013-08-19	1	M	0015350-13	93173151		CONGESTIVE CARDIAC FAILURE	PAED15C	I50.9	246.49	31.6	278.09	Fraudulent
93	2013-09-06	2013-09-16	11	M	0020431-13	56397822	BURNS-NON OPERATIVE MANAGEMENT	BURNS	PSUR27C	T31.1	785.26	67.1	852.36	Legal
94	2013-09-02	2013-09-05	3	F	0006865-13	64309782	EXCISION BIOPSY SUPERFICIAL MASSES	TYROGLOSSAL CYST	PSUR05C	Q89.2	151.44	44.15	195.59	Fraudulent
95	2013-08-16	2013-09-06	1	F	445889	98055947	BURNS-NON OPERATIVE MANAGEMENT	BURNS	PSUR27C	T31.1	785.26	17.67	802.93	Legal
96	2013-08-27	2013-09-20	6	F	0018003-13	68414556	LAPORATOMY WITH APPENDICTOMY	CHRONIC APPENDICITIS	PSUR12C	K36	378.17	253.72	631.89	Fraudulent
97	2013-08-22	30/9/20013	2	F	446010	79029271	BURNS-NON OPERATIVE MANAGEMENT	BURNS	PSUR27C	T31.1	785.26	42.58	827.84	Legal
98	2013-09-02	2013-09-05	3	F	0006865-13	64309782	EXCISION BIOPSY SUPERFICIAL MASSES	TYROGLOSSAL CYST	PSUR05C	Q89.2	151.44	44.15	195.59	Fraudulent
99	2013-09-21		12	M	3683-13	65474946			OPDC06C		7.75	12.8	20.55	Fraudulent
100	2013-08-13	2013-08-16	1	F	0014609-13	93183805		BRONCHIOLITIS	PAED30C	J21.9	107.14	4.03	111.17	Legal

## Sheet: Sheet3
G-DRG	Age	SEX	Tariff (GH¢)
ASUR01A	1	2	499.19
ASUR02A	1	2	962.49
ASUR03A	1	2	283.35
ASUR04A	1	2	843.55
ASUR05A	1	2	304.26
ASUR06A	1	2	712.91
ASUR07A	1	2	511.17
ASUR08A	1	2	481.5
ASUR09A	1	2	193.23
ASUR10A	1	2	474.12
ASUR11A	1	2	855
ASUR12A	1	2	738.2
ASUR13A	1	2	935.37
ASUR14A	1	2	269.22
ASUR15A	1	2	337.11
ASUR16A	1	2	524.7
ASUR17A	1	2	706.5
ASUR18A	1	2	861.29
ASUR19A	1	2	428.21
ASUR20A	1	2	238.86
ASUR21A	1	2	611.69
ASUR22A	1	2	209.62
ASUR23A	1	2	484.45
ASUR24A	1	2	780.24
ASUR25A	1	2	353.34
ASUR27A	1	2	150.77
ASUR28A	1	2	535.43
ASUR29A	1	2	904.17
ASUR30A	1	2	151.19
ASUR31A	1	2	224.87
ASUR32A	1	2	404.38
ASUR33A	1	2	669.8
ASUR34A	1	2	208.69
ASUR35A	1	2	215.46
ASUR36A	1	2	329.07
ASUR37A	1	2	465.96
DENT01A	1	2	26.97
DENT01C	0	2	24.98
DENT02A	1	2	52.75
DENT03A	1	2	29.64
DENT03C	0	2	28.31
DENT04A	1	2	38.98
DENT04C	0	2	39.3
DENT05A	1	2	40.6
DENT05C	0	2	35.27
DENT06A	1	2	15.48
DENT06C	0	2	11.67
DENT07A	1	2	36.66
DENT07C	0	2	35.4
DENT08A	1	2	62.19
DENT08C	0	2	57.52
DENT09A	1	2	159.3
DENT09C	0	2	129.54
DENT10A	1	2	28.86
DENT10C	0	2	26.3
DENT11A	1	2	52.07
DENT11C	0	2	48.14
DENT12A	1	2	209.39
DENT12C	0	2	187.02
DENT13A	1	2	134.76
DENT13C	0	2	106.12
DENT14A	1	2	447.82
DENT14C	0	2	392.47
DENT15A	1	2	61.95
DENT15C	0	2	49.37
DENT16A	1	2	31.91
DENT16C	0	2	27.88
DENT17A	1	2	20.08
DENT17C	0	2	18.53
DENT18A	1	2	383.67
DENT18C	0	2	336.75
DENT19A	1	2	458.62
DENT19C	0	2	363.14
DENT20A	1	2	272.5
DENT20C	0	2	203.01
DENT21A	1	2	414.77
DENT21C	0	2	350.43
DENT22A	1	2	102.78
DENT22C	0	2	75.41
DENT23A	1	2	15.05
DENT23C	0	2	15.22
DENT24A	1	2	12
DENT24C	0	2	11.78
MEDI01A	1	2	214.32
MEDI02A	0	2	173.7
MEDI03A	1	2	336.88
MEDI04A	0	2	180.93
MEDI05A	1	2	212.64
MEDI06A	0	2	190.83
MEDI07A	1	2	247.68
MEDI08A	0	2	117.88
MEDI10A	1	2	359.9
MEDI11A	0	2	284.27
MEDI12A	1	2	172.89
MEDI13A	0	2	155.36
MEDI14A	1	2	231.42
MEDI15A	0	2	344.82
MEDI16A	1	2	179.85
MEDI17A	0	2	249.55
MEDI18A	1	2	388.6
MEDI19A	0	2	247.4
MEDI20A	1	2	306.15
MEDI21A	0	2	1046.85
MEDI22A	1	2	126.81
MEDI23A	0	2	116.29
MEDI24A	1	2	200.85
MEDI25A	0	2	226.99
MEDI26A	1	2	79.38
MEDI27A	0	2	285.51
MEDI28A	1	2	63.59
MEDI29A	0	2	215.62
MEDI30A	1	2	331.94
MEDI31A	0	2	159.74
MEDI32A	1	2	166.73
MEDI33A	0	2	197.8
MEDI34A	1	2	227.14
MEDI35A	0	2	353.6
MEDI36A	1	2	172.19
MEDI37A	0	2	50.93
MEDI38A	1	2	207.53
MEDI39A	0	2	33.08
MEDI40A	1	2	32.37
MEDI41A	0	2	215.62
OPDC02A	1	2	22.13
OPDC03A	1	2	11.6
OPDC03C	0	2	11.6
OPDC04A	1	2	11.9
OPDC04C	0	2	10.68
OPDC05A	1	2	11.39
OPDC05C	0	2	11.39
OPDC06A	1	2	12.85
OPDC06C	0	2	11.93
OPDC11A	1	2	6.17
OPDC11C	0	2	6.17
OPDC13A	1	2	12.33
OPDC13C	0	2	12.33
ORTH01A	1	2	53.83
ORTH01C	0	2	50.57
ORTH02A	1	2	228.5
ORTH02C	0	2	211.47
ORTH03A	1	2	502.48
ORTH03C	0	2	442.36
ORTH04A	1	2	360.95
ORTH04C	0	2	328.74
ORTH05A	1	2	245.3
ORTH05C	0	2	211.22
ORTH06A	1	2	31.65
ORTH06C	0	2	28.29
ORTH07A	1	2	150.28
ORTH07C	0	2	135.08
ORTH08A	1	2	489.92
ORTH08C	0	2	448.5
ORTH09A	1	2	437.7
ORTH09C	0	2	387.36
ORTH10A	1	2	906.85
ORTH10C	0	2	749.14
ORTH11A	1	2	172.88
ORTH11C	0	2	145.82
ORTH12A	1	2	541.14
ORTH12C	0	2	454.16
ORTH14A	1	2	642.27
ORTH14C	0	2	552.26
ORTH15A	1	2	128.94
ORTH15C	0	2	118.8
ORTH16A	1	2	65.42
ORTH16C	0	2	52.53
ORTH17A	1	2	641.79
ORTH17C	0	2	565.03
ORTH18A	1	2	836
ORTH18C	0	2	693.06
ORTH19A	1	2	387.02
ORTH19C	0	2	371.37
ORTH20A	1	2	482.09
ORTH20C	0	2	441.25
ORTH22A	1	2	381.23
ORTH22C	0	2	346.93
ORTH23A	1	2	335.72
ORTH23C	0	2	306.02
ORTH24A	1	2	183.04
ORTH24C	0	2	229.44
ORTH25A	1	2	215.46
ORTH25C	0	2	220.43
ORTH26A	1	2	329.07
ORTH26C	0	2	350.03
ORTH27A	1	2	465.96
ORTH27C	0	2	478.83
PAED01C	0	2	188.78
PAED02C	0	2	172.09
PAED03C	0	2	342.64
PAED04C	0	2	180.35
PAED05C	0	2	242.75
PAED06C	0	2	222.21
PAED07C	0	2	134.26
PAED08C	0	2	280.98
PAED09C	0	2	154.33
PAED10C	0	2	299
PAED11C	0	2	142.37
PAED12C	0	2	196.67
PAED13C	0	2	437.49
PAED14C	0	2	259.05
PAED15C	0	2	277.3
PAED16C	0	2	217.91
PAED18C	0	2	353.19
PAED19C	0	2	337.29
PAED20C	0	2	184.59
PAED21C	0	2	124.72
PAED22C	0	2	224.17
PAED23C	0	2	331.86
PAED24C	0	2	233.58
PAED25C	0	2	272.68
PAED26C	0	2	399.29
PAED27C	0	2	212.22
PAED28C	0	2	258.02
PAED29C	0	2	725.2
PAED30C	0	2	120.53
PAED31C	0	2	126.78
PAED32C	0	2	171.59
PAED33C	0	2	243.64
PAED34C	0	2	73.99
PAED35C	0	2	270.34
PAED36C	0	2	82.07
PAED37C	0	2	250.02
PAED38C	0	2	252.47
PAED39C	0	2	102.75
PAED40C	0	2	170.53
PAED41C	0	2	219.07
PAED42C	0	2	262.18
PAED43C	0	2	359.31
PAED44C	0	2	52.72
PAED45C	0	2	291.57
PAED46C	0	2	250.02
ZOOM01A	1	2	79.39
ZOOM01C	0	2	69.89
ZOOM02A	1	2	18.15
ZOOM02C	0	2	16.03
ZOOM03A	1	2	56.69
ZOOM03C	0	2	48.7
ZOOM04A	1	2	7.1
ZOOM04C	0	2	7.1
ZOOM05A	1	2	12.66
ZOOM05C	0	2	12.66
PSUR01C	0	2	498.99
PSUR02C	0	2	536.05
PSUR03C	0	2	589.98
PSUR04C	0	2	430.07
PSUR05C	0	2	199.14
PSUR06C	0	2	265.07
PSUR07C	0	2	180.09
PSUR08C	0	2	440.19
PSUR09C	0	2	413.57
PSUR10C	0	2	461.16
PSUR11C	0	2	457.56
PSUR12C	0	2	425.44
PSUR13C	0	2	131.03
PSUR14C	0	2	582.14
PSUR15C	0	2	472.47
PSUR16C	0	2	801.37
PSUR17C	0	2	328.76
PSUR18C	0	2	499.53
PSUR19C	0	2	546.17
PSUR20C	0	2	1441.9
PSUR21C	0	2	169.45
PSUR22C	0	2	62.29
PSUR23C	0	2	568.98
PSUR24C	0	2	559.18
PSUR25C	0	2	497.31
PSUR26C	0	2	329.07
PSUR27C	0	2	883.42
PSUR28C	0	2	892.52
PSUR29C	0	2	304.62
PSUR30C	0	2	516.18
PSUR31C	0	2	522.65
PSUR32C	0	2	902.85
PSUR33C	0	2	156.81
PSUR34C	0	2	181.44
PSUR35C	0	2	686.06
PSUR36C	0	2	220.22
PSUR37C	0	2	220.43
PSUR38C	0	2	350.03
PSUR39C	0	2	478.83
OBGY01A	4	3	363.2
OBGY02A	4	3	204.32
OBGY03A	4	3	255.22
OBGY04A	4	3	115.55
OBGY05A	4	3	118.16
OBGY06A	4	3	101.46
OBGY07A	4	3	158.3
OBGY08A	4	3	120.47
OBGY09A	4	3	78.8
OBGY10A	4	3	155.55
OBGY11A	4	3	157.38
OBGY12A	4	3	116.45
OBGY13A	4	3	297.98
OBGY14A	4	3	370.68
OBGY15A	4	3	297.38
OBGY16A	4	3	9.73
OBGY17A	4	3	281.04
OBGY18A	4	3	388.11
OBGY19A	4	3	479.23
OBGY20A	4	3	353.8
OBGY21A	4	3	312.39
OBGY22A	4	3	446.69
OBGY23A	4	3	97.47
OBGY24A	4	3	379.22
OBGY25A	4	3	182.55
OBGY26A	4	3	153.47
OBGY27A	4	3	263.31
OBGY28A	4	3	367.17
OBGY29A	4	3	120.53
OBGY30A	4	3	125.38
OBGY31A	4	3	155.01
OBGY32A	4	3	312.69
OBGY34A	4	3	88.77
OBGY35A	4	3	215.78
OBGY36A	4	3	404.55
OBGY38A	4	3	117.14
OBGY39A	4	3	667.5
OBGY40A	4	3	181.38
