# Supplementary material for: Decision Support System (DSS) for Fraud Detection in Health Insurance Claims Using Genetic Support Vector Machines (GSVMs)
Source: Hindawi journal article supplement (doi:10.1155/2019/1432597), 2019-09-02
Supplement: f1 [file 1432597.f1.zip › 1432597.f1/ReData3_500_1.xlsx]

## Sheet: Sheet1
No.	Attendance Date	Discharge Date	Age	Sex	Folder No	NHIS ID No	Procudure	Diagnosis	G-DRG	ICD10	Service	Medical	Total	Tarrif	EVAL	Overbilled	duplicate	unbundule	Upcoded	Output
11302	2012-12-25	2012-12-31	22	F	421455	66989440	LAPAROLONY	ABDOMIAL TRIRY 2 FRAUMA	ASUR08A	T14.0	332.02	91.2	423.22	481.5	58.28	Legal	Legal	Legal	Legal	Legal
11286	2013-01-21	2013-01-28	38	F	46489	63313932	THYRIODECTOMY	TOXIC MULTINODULER GOITRE	ASUR01A	D44.0	339.04	71.38	410.42	422.19	11.77	Legal	Legal	Legal	Legal	Legal
11277	2013-01-03	2013-01-08	21	F	69363	16437273	APPENCEMTOMY	ACUTE APPENDCSTIS	ASUR08A	K37.7	332.02	132.2	464.22	481.5	17.28	Legal	Legal	Legal	Legal	Legal
11280	2013-01-03	2013-01-11	32	F	270830	16369104	LAPAROTOMY	APPENDICITIS	ASUR08A	K37.7	332.02	110.05	442.07	481.5	39.43	Legal	Legal	Legal	Legal	Legal
11282	2013-01-04	2013-01-14	32	F	422671	71258176	LAPAROTOMY	APPENDICITIS	ASUR08A	K37.7	332.02	213.1	545.12	481.5	-63.62	Fradulent	Legal	Fraudulent	Fraudulent	Fraudulent
11291	2013-01-16	2013-01-25	38	M	424538	89745566	LAPAROTOMY	PERITONITIS	ASUR08A	K65.9	332.02	78.84	410.86	481.5	70.64	Legal	Legal	Legal	Legal	Legal
11293	2013-01-06	2013-01-11	14	M	423000	47979145	APPENCEMTOMY	ACUTE APPENDCSTIS	ASUR08A	K37.7	332.02	39.5	371.52	481.5	109.98	Legal	Legal	Legal	Legal	Legal
11296	2013-12-30	2013-01-02	39	M	422066	16422413	APPENCEMTOMY	APPENDICITIS	ASUR08A	K37.7	332.02	39.7	371.72	481.5	109.78	Legal	Legal	Legal	Legal	Legal
11297	2013-01-12	2013-01-25	52	F	62002	55060951	APPENCEMTOMY	APPENDICITIS	ASUR08A	K37.7	332.02	74.04	406.06	481.5	75.44	Legal	Legal	Legal	Legal	Legal
11301	2013-01-14	2013-01-16	15	M	424033	61273367	APPENCEMTOMY	APPENDICITIS	ASUR08A	K37.7	332.02	101.74	433.76	481.5	47.74	Legal	Legal	Legal	Legal	Legal
11281	2013-01-09	2013-01-11	26	F	422659	71979225		PERFIRATION	ASUR09A	A01.0	64.09	46.24	110.33	193.23	82.9	Legal	Legal	Legal	Legal	Legal
11287	2013-01-18	2013-01-22	49	M	228713	16467451		ACUTE EPIDIDYMO	ASUR09A		64.09	29.04	93.13	193.23	100.1	Legal	Legal	Legal	Legal	Legal
11288	2013-01-20	2013-01-23	69	M	425175	77858288		VARICEAL BLEEDING	ASUR09A	I85.9	64.09	13.74	77.83	193.23	115.4	Legal	Legal	Legal	Legal	Legal
11275	2013-01-03	2013-01-06	34	M	420296	85334094	HERNIA REPAIR HYDROCELECTOMY	MESENTERIC HERNIA	ASUR19A	R46.9	267.8	57.95	325.75	428.21	102.46	Legal	Legal	Legal	Legal	Legal
11300	2013-01-08	2013-01-10	18	F	423260	69264801	HERMORRHAPHY	STRANGULATED FERNORAL HERNIA	ASUR19A	K46.9	267.8	48.34	316.14	428.21	112.07	Legal	Legal	Legal	Legal	Legal
11278	2013-01-03	2013-01-09	48	F	423109	16429713	HERMORRHAPHY	PARAUMBILICAL	ASUR20A	K42.9	144.82	63.22	208.04	238.86	30.82	Legal	Legal	Legal	Legal	Legal
11289	2013-01-29	2013-01-31	80	M	422093	79413422	HERNMORRAPHY	RIGHT HIGUNIAL HERNIPLAPHY	ASUR20A	K40.9	144.82	71.14	215.96	238.86	22.9	Legal	Legal	Legal	Legal	Legal
11298	2013-01-21	2013-01-25	78	M	421333	17073387	HERMORRHAPHY	INGMINAL HERNIA	ASUR20A	K40.9	144.82	33.3	178.12	238.86	60.74	Legal	Legal	Legal	Legal	Legal
11299	2013-01-03	2013-01-21	68	M	141891	26922133	PROSTATESTOMY	BENING PROSTATIC HYPERTROPHY	ASUR21A	N40	478.14	76.8	554.94	611.69	56.75	Legal	Legal	Legal	Legal	Legal
11290	2013-01-20	2013-01-25	58	M	425185	82879407	SURGERY ON SCROTUM	TORSION OF TESTIS	ASUR22A	N44	126.1	59.54	185.64	209.62	23.98	Legal	Legal	Legal	Legal	Legal
11292	2013-01-03	2013-01-11	50	M	18919	16370459	INCISUN AND DRIANAGE	PALMER ABSCESS	ASUR31A	L02.9	141.44	160.24	301.68	224.87	-76.81	Fradulent	Legal	Fraudulent	Fraudulent	Fraudulent
11294	2013-01-08	2013-01-19	35	F	423402	60381032	DEBRIDEMRNT	SEPTIC WOUND	ASUR31A	T79.30	141.44	356.4	497.84	224.87	-272.97	Fradulent	Legal	Fraudulent	Fraudulent	Fraudulent
9032	1-23-2013	1-23-2013	34	F	0162-13	81753790	EXTRACTION	APICALPERIODDICALITY	DENT01A		15.47		15.47	26.67	11.2	Legal	Legal	Legal	Legal	Legal
9033	1-23-2013	1-23-2013	77	F	0253-13	55952646	EXTRACTION	APICALPERIODDICALITY	DENT01A		15.47		15.47	26.67	11.2	Legal	Legal	Legal	Legal	Legal
9034	1-23-2013	1-23-2013	9	M	2174-12	16371882	EXTRACTION	CARIES	DENT01A		14.95		14.95	26.67	11.72	Legal	Legal	Legal	Legal	Legal
9035	1-23-2013	1-23-2013	31	F	0248-13	67416693	EXTRACTION	APICALPERIODDICALITY	DENT01A		15.47		15.47	26.67	11.2	Legal	Legal	Legal	Legal	Legal
9037	1-23-2013	1-23-2013	29	M	0262-13	75402323	EXTRACTION	APICALPERIODDICALITY	DENT01A		15.47		15.47	26.67	11.2	Legal	Legal	Legal	Legal	Legal
9041	1-31-2013	1-31-2013	6	M	1306-11	16817208	EXTRACTION	APICALPERIODDICALITY	DENT01A		14.95		14.95	26.67	11.72	Legal	Legal	Legal	Legal	Legal
9042	1-31-2013	1-31-2013	25	F	0375-13	80166265	EXTRACTION	PERIODITIS	DENT01A		15.47		15.47	26.67	11.2	Legal	Legal	Legal	Legal	Legal
9044	2013-10-01	2013-10-01	45	F	0083-13	16380545	EXTRACTION	APICALPERIODDICALITY	DENT01A		15.47		15.47	26.67	11.2	Legal	Legal	Legal	Legal	Legal
9045	1-31-2013	1-31-2013	25	M	0338-13	82681192	EXTRACTION	APICALPERIODDICALITY	DENT01A		15.47		15.47	26.67	11.2	Legal	Legal	Legal	Legal	Legal
9047	2013-09-01	2013-09-01	83	F	0065-13	16493572	EXTRACTION	CARIES	DENT01A		15.47		15.47	26.67	11.2	Legal	Legal	Legal	Legal	Legal
9048	2013-09-01	2013-09-01	10	F	1506-09	16414199	EXTRACTION	CARIES	DENT01A		14.95		14.95	26.67	11.72	Legal	Legal	Legal	Legal	Legal
9054	2013-08-01	2013-08-01	57	F	0086-13	16502593	EXTRACTION	CARIES	DENT01A		15.47		15.47	26.67	11.2	Legal	Legal	Legal	Legal	Legal
9062	2013-10-01	2013-10-01	34	M	0081-13	52399381	EXTRACTION	CARIES	DENT01A		15.47		15.47	26.67	11.2	Legal	Legal	Legal	Legal	Legal
9064	2013-10-01	2013-10-01	45	F	4474-09	55470108	EXTRACTION	CARIES	DENT01A		15.47		15.47	26.67	11.2	Legal	Legal	Legal	Legal	Legal
9065	2013-10-01	2013-10-01	39	F	1846-08	84894948	EXTRACTION	CARIES	DENT01A		15.47		15.47	26.67	11.2	Legal	Legal	Legal	Legal	Legal
9069	2013-10-01	2013-10-01	57	F	1145-07	67083596	EXTRACTION	APICALPERIODDICALITY	DENT01A		15.57		15.57	26.67	11.1	Legal	Legal	Legal	Legal	Legal
9070	2013-10-01	2013-10-01	66	F	0097-13	61376326	EXTRACTION	CARIES	DENT01A		15.47		15.47	26.67	11.2	Legal	Legal	Legal	Legal	Legal
9071	2013-10-01	2013-10-01	20	M	0053-13	16418234	EXTRACTION	CARIES	DENT01A		15.47		15.47	26.67	11.2	Legal	Legal	Legal	Legal	Legal
9076	2013-10-01	2013-10-01	6	F	0078-13	62848849	EXTRACTION	CARIES	DENT01A		14.95		14.95	26.67	11.72	Legal	Legal	Legal	Legal	Legal
8826	1-31-2013	1-31-2013	9	M	0377-13	66845370	EXTRACTION	RETAINED ROOT	DENT01C		14.95	2.3	17.25	24.98	7.73	Legal	Legal	Legal	Legal	Legal
8876	1-18-2013	1-18-2013	8	M	0085-13	16393330	EXTRACTION	CARIES	DENT01C		14.95		14.95	24.98	10.03	Legal	Legal	Legal	Legal	Legal
8883	1-18-2013	1-18-2013	6	F	4836-12	51430060	EXTRACTION	CARIES	DENT01C		14.95		14.95	24.98	10.03	Legal	Legal	Legal	Legal	Legal
8931	1-28-2013	1-28-2013	10	M	4013-12	74936113	EXTRACTION	CARIES	DENT01C		14.95	2.5	17.45	24.98	7.53	Legal	Legal	Legal	Legal	Legal
8936	1-30-2013	1-30-2013	7	M	0332-13	66962221	EXTRACTION	APICAL PEROIDONITITS	DENT01C		14.95		14.95	24.98	10.03	Legal	Legal	Legal	Legal	Legal
9072	2013-10-01	2013-10-01	10	M	0060-13	54512774	EXTRACTION	CARIES	DENT01C		14.95		14.95	24.98	10.03	Legal	Legal	Legal	Legal	Legal
9075	2013-10-01	2013-10-01	5	M	0032-13	63427090	EXTRACTION	CARIES	DENT01C		15.47		15.47	24.98	9.51	Legal	Legal	Legal	Legal	Legal
9077	2013-10-01	2013-10-01	10	F	0098-13	16378528	EXTRACTION	APICALPERIODDICALITY	DENT01C		14.95		14.95	24.98	10.03	Legal	Legal	Legal	Legal	Legal
9079	2013-10-01	2013-10-01	5	F	0054-13	85299862	EXTRACTION	CARIES	DENT01C		14.95		14.95	24.98	10.03	Legal	Legal	Legal	Legal	Legal
9080	2013-10-01	2013-10-01	5	M	PP81-13	81878067	EXTRACTION	CARIES	DENT01C		14.95		14.95	24.98	10.03	Legal	Legal	Legal	Legal	Legal
8821	1-31-2013	1-31-2013	24	F	0196-12	16374480	EXTRACTION	RETAINED ROOT	DENT08A		49.01	1.8	50.81	62.69	11.88	Legal	Legal	Legal	Legal	Legal
8848	2013-11-01	2013-11-01	35	F	4934-12	84164038	CONSULTATION	DRY SOCKET	DENT12A		150.28		150.28	209.39	59.11	Legal	Legal	Legal	Legal	Legal
8915	2013-11-01	2013-11-01	35	F	0136-13	66610592	CURETTAGE OF SOCKET	DRY SOCKET	DENT12A		150.28		150.28	209.39	59.11	Legal	Legal	Legal	Legal	Legal
9043	1-31-2013	1-31-2013	63	M	0376-13	16358187	EXTRACTION	FRACTURED	DENT20A		118.17		118.17	272.5	154.33	Legal	Legal	Legal	Legal	Legal
10009	1-16-2013	1-16-2013	71	M		16364558			INVES41D		3.17		3.17	0	-3.17	Fradulent	Legal	Fraudulent	Fraudulent	Fraudulent
10013	1-15-2013	1-15-2013	38	M		35872721			INVES41D		3.17		3.17	0	-3.17	Fradulent	Legal	Fraudulent	Fraudulent	Fraudulent
10014	1-14-2013	1-14-2013	58	F		16380957			INVES41D		3.17		3.17	0	-3.17	Fradulent	Legal	Fraudulent	Fraudulent	Fraudulent
10015	1-14-2013	1-14-2013	64	F		16354489			INVES41D		3.17		3.17	0	-3.17	Fradulent	Legal	Fraudulent	Fraudulent	Fraudulent
9930	1-30-2013	1-30-2013	30	M		60665804			INVES52D		4.32		4.32	0	-4.32	Fradulent	Legal	Fraudulent	Fraudulent	Fraudulent
9953	2013-10-01	2013-10-01	42	F		42946565			INVES52D		4.32		4.32	0	-4.32	Fradulent	Legal	Fraudulent	Fraudulent	Fraudulent
9958	2013-08-01	2013-08-01	1	M		86153139			INVES52D		4.32		4.32	0	-4.32	Fradulent	Legal	Fraudulent	Fraudulent	Fraudulent
9964	2013-07-01	2013-07-01	46	M		44326302			INVES52D		4.32		4.32	0	-4.32	Fradulent	Legal	Fraudulent	Fraudulent	Fraudulent
9921	2013-11-01	2013-11-01	4	M		75155982			INVES56D		2.93		2.93	0	-2.93	Fradulent	Legal	Fraudulent	Fraudulent	Fraudulent
9935	1-15-2013	1-15-2013	45	M		54066893			INVES58D		12.09		12.09	0	-12.09	Fradulent	Legal	Fraudulent	Fraudulent	Fraudulent
9936	1-18-2013	1-18-2013	49	M		77424687			INVES58D		12.09		12.09	0	-12.09	Fradulent	Legal	Fraudulent	Fraudulent	Fraudulent
9937	1-18-2013	1-18-2013	76	F		84112681			INVES58D		12.09		12.09	0	-12.09	Fradulent	Legal	Fraudulent	Fraudulent	Fraudulent
9939	1-18-2013	1-18-2013	54	M		52816434			INVES58D		12.09		12.09	0	-12.09	Fradulent	Legal	Fraudulent	Fraudulent	Fraudulent
9940	1-16-2013	1-16-2013	67	F		56694726			INVES58D		12.09		12.09	0	-12.09	Fradulent	Legal	Fraudulent	Fraudulent	Fraudulent
9941	1-16-2013	1-16-2013	68	F		15584735			INVES58D		12.09		12.09	0	-12.09	Fradulent	Legal	Fraudulent	Fraudulent	Fraudulent
9943	1-16-2013	1-16-2013	17	M		67132608			INVES58D		12.09		12.09	0	-12.09	Fradulent	Legal	Fraudulent	Fraudulent	Fraudulent
9948	2013-09-01	2013-09-01	36	F		48641475			INVES58D		12.09		12.09	0	-12.09	Fradulent	Legal	Fraudulent	Fraudulent	Fraudulent
9951	2013-07-01	2013-07-01	63	M		16511337			INVES58D		12.09		12.09	0	-12.09	Fradulent	Legal	Fraudulent	Fraudulent	Fraudulent
9735	2013-04-01	2013-04-01	59	F		16393830			INVES75D		7.28		7.28	0	-7.28	Fradulent	Legal	Fraudulent	Fraudulent	Fraudulent
9742	2013-02-01	2013-02-01	22	M		62689854			INVES75D		7.28		7.28	0	-7.28	Fradulent	Legal	Fraudulent	Fraudulent	Fraudulent
9743	2013-03-01	2013-03-01	58	F		63056129			INVES75D		7.28		7.28	0	-7.28	Fradulent	Legal	Fraudulent	Fraudulent	Fraudulent
9751	2013-04-01	2013-04-01	63	F		16444597			INVES75D		7.28		7.28	0	-7.28	Fradulent	Legal	Fraudulent	Fraudulent	Fraudulent
9805	1-15-2013	1-15-2013	63	F		16451103			INVES75D		7.28		7.28	0	-7.28	Fradulent	Legal	Fraudulent	Fraudulent	Fraudulent
9879	1-24-2013	1-24-2013	73	M		16439445			INVES75D		7.28		7.28	0	-7.28	Fradulent	Legal	Fraudulent	Fraudulent	Fraudulent
9882	1-22-2013	1-22-2013	54	F		53546959			INVES75D		7.28		7.28	0	-7.28	Fradulent	Legal	Fraudulent	Fraudulent	Fraudulent
9988	1-15-2013	1-15-2013	73	M		15569754			INVES89D		12.09		12.09	0	-12.09	Fradulent	Legal	Fraudulent	Fraudulent	Fraudulent
9989	1-15-2013	1-15-2013	49	F		16396800			INVES89D		12.09		12.09	0	-12.09	Fradulent	Legal	Fraudulent	Fraudulent	Fraudulent
9990	1-15-2013	1-15-2013	60	F		65830549			INVES89D		12.09		12.09	0	-12.09	Fradulent	Legal	Fraudulent	Fraudulent	Fraudulent
9991	1-15-2013	1-15-2013	47	M		64203148			INVES89D		12.09		12.09	0	-12.09	Fradulent	Legal	Fraudulent	Fraudulent	Fraudulent
9999	1-30-2013	1-30-2013	6	M		67130880			INVES89D		12.09		12.09	0	-12.09	Fradulent	Legal	Fraudulent	Fraudulent	Fraudulent
10000	1-17-2013	1-17-2013	28	F		86605774			INVES89D		12.09		12.09	0	-12.09	Fradulent	Legal	Fraudulent	Fraudulent	Fraudulent
10011	1-17-2013	1-17-2013	56	M		16390759			INVES89D		12.09		12.09	0	-12.09	Fradulent	Legal	Fraudulent	Fraudulent	Fraudulent
10012	1-18-2013	1-18-2013	47	M		50536880			INVES89D		12.09		12.09	0	-12.09	Fradulent	Legal	Fraudulent	Fraudulent	Fraudulent
9773	2013-03-01	2013-03-01	72	F		53714072			INVES90D		16.04		16.04	0	-16.04	Fradulent	Legal	Fraudulent	Fraudulent	Fraudulent
9774	2013-03-01	2013-03-01	56	M		82573784			INVES90D		16.04		16.04	0	-16.04	Fradulent	Legal	Fraudulent	Fraudulent	Fraudulent
9857	1-24-2013	1-24-2013	64	M		60568304			INVES90D		16.04		16.04	0	-16.04	Fradulent	Legal	Fraudulent	Fraudulent	Fraudulent
9860	1-24-2013	1-24-2013	62	F		51340149			INVES90D		16.04		16.04	0	-16.04	Fradulent	Legal	Fraudulent	Fraudulent	Fraudulent
9868	1-28-2013	1-28-2013	59	F		17623354			INVES90D		16.04		16.04	0	-16.04	Fradulent	Legal	Fraudulent	Fraudulent	Fraudulent
9938	1-18-2013	1-18-2013	60	F		66666318			INVES90D		16.04		16.04	0	-16.04	Fradulent	Legal	Fraudulent	Fraudulent	Fraudulent
9942	1-14-2013	1-14-2013	17	M		16373379			INVES90D		16.04		16.04	0	-16.04	Fradulent	Legal	Fraudulent	Fraudulent	Fraudulent
9949	2013-09-01	2013-09-01	66	F		85428029			INVES90D		16.04		16.04	0	-16.04	Fradulent	Legal	Fraudulent	Fraudulent	Fraudulent
9950	2013-07-01	2013-07-01	39	F		36600316			INVES90D		16.04		16.04	0	-16.04	Fradulent	Legal	Fraudulent	Fraudulent	Fraudulent
9970	1-14-2013	1-14-2013	46	F		64914656			INVES90D		16.04		16.04	0	-16.04	Fradulent	Legal	Fraudulent	Fraudulent	Fraudulent
9978	2013-09-01	2013-09-01	67	F		16518708			INVES90D		16.04		16.04	0	-16.04	Fradulent	Legal	Fraudulent	Fraudulent	Fraudulent
9992	1-15-2013	1-15-2013	65	M		55700419			INVES90D		16.04		16.04	0	-16.04	Fradulent	Legal	Fraudulent	Fraudulent	Fraudulent
10010	1-17-2013	1-17-2013	65	F		43855973			INVES90D		16.04		16.04	0	-16.04	Fradulent	Legal	Fraudulent	Fraudulent	Fraudulent
11011	1-23-2013	1-26-2013	87	F	129085	16423899		HYPERGLYCAEMIA	MEDI02A	E14	190.45	44.05	234.5	173.7	-60.8	Fradulent	Legal	Fraudulent	Fraudulent	Fraudulent
11009	2013-10-01	1-17-2013	22	F	423632	89844502		DIABETES	MEDI02A		104.65	34.75	139.4	173.7	34.3	Legal	Legal	Legal	Legal	Legal
11050	2012-12-25	2012-12-28	45	F	78850	16526892		DIABETIES	MEDI02A	E10	104.65	45.8	150.45	173.7	23.25	Legal	Legal	Legal	Legal	Legal
11070	2012-12-16	2012-12-27	50	M	420040	58504487		DIABETES MELHTUS	MEDI02A	E10	104.65	94.92	199.57	173.7	-25.87	Fradulent	Legal	Fraudulent	Fraudulent	Fraudulent
10849	2012-12-19	2013-01-10	56	M	420305	16463671		DIABETES COMPLICATED	MEDI03A	E14.0	190.45	52.7	243.15	336.88	93.73	Legal	Legal	Legal	Legal	Legal
10858	2012-12-26	2013-01-02	67	M	421707	38030758		DIABETES MELLITUS	MEDI03A	E14.0	190.45	6.8	197.25	336.88	139.63	Legal	Legal	Legal	Legal	Legal
10867	2013-01-04	2013-01-07	64	M	421687	89633935		DIABETES(HYPERGLYCAENIL)	MEDI03A	E87.0	190.45	5.6	196.05	336.88	140.83	Legal	Legal	Legal	Legal	Legal
10891	1-21-2013	1-29-2013	54	F	425279	85350591		DIABETES MELLITUS COMPLICATED	MEDI03A	E14.0	190.45	136.51	326.96	336.88	9.92	Legal	Legal	Legal	Legal	Legal
10908	2013-07-01	1-15-2013	54	F	423195	85744799		HYPERGLYCAEMIA	MEDI03A	E74	190.45	73	263.45	336.88	73.43	Legal	Legal	Legal	Legal	Legal
10916	1-14-2013	1-19-2013	52	F	424231	85992838		HYPERGLYCAEMIA	MEDI03A	E87	190.45	35.15	225.6	336.88	111.28	Legal	Legal	Legal	Legal	Legal
10930	2013-08-01	1-14-2013	47	F	59762	16420246		DIABETES MELLITUS	MEDI03A	E14.0	190.45	17.4	207.85	336.88	129.03	Legal	Legal	Legal	Legal	Legal
10932	2013-04-01	2013-11-01	38	F	422743	16008958		HYPERTENSION	MEDI03A	E87.0	190.45	140.81	331.26	336.88	5.62	Legal	Legal	Legal	Legal	Legal
10935	2013-04-01	2013-11-01	32	M	422776	72008858		COMPLICATED DIABETES MELITUS	MEDI03A	E14.0	190.45	96.9	287.35	336.88	49.53	Legal	Legal	Legal	Legal	Legal
10948	2013-07-01	1-15-2013	73	F	388934	61255181		HYPERGLYCAEMIA	MEDI03A	E87.0	190.45	94.22	284.67	336.88	52.21	Legal	Legal	Legal	Legal	Legal
10954	2013-05-01	2013-07-01	74	F	422823	16368463		HYPERGLYCAEMIA	MEDI03A		190.45	5.6	196.05	336.88	140.83	Legal	Legal	Legal	Legal	Legal
10937	1-21-2013	1-22-2013	26	F	420818	87728617		SEVERE ANAEMIA	MEDI06A	D51.9	128.83	18.56	147.39	190.83	43.44	Legal	Legal	Legal	Legal	Legal
10940	2013-09-01	2013-11-01	37	F	423524	50825407		SEVERE ANAEMIA	MEDI06A	D51.9	147.42	0.06	147.48	190.83	43.35	Legal	Legal	Legal	Legal	Legal
10944	1-25-2013	1-29-2013	14	F	421438	77474442		ANAEMIA	MEDI06A	D50.9	128.83	2.2	131.03	190.83	59.8	Legal	Legal	Legal	Legal	Legal
10960	2013-08-01	1-26-2013	82	M	421119	16356348		SEVERE ANAMIA	MEDI06A		128.83	56.92	185.75	190.83	5.08	Legal	Legal	Legal	Legal	Legal
10966	1-23-2013	1-25-2013	16	F	425759	83513790		SEVERE ANAMIA	MEDI06A		128.83	12.01	140.84	190.83	49.99	Legal	Legal	Legal	Legal	Legal
10979	1-13-2013	1-16-2013	24	F	188653	24728479		SEVERE ANAMIA	MEDI06A		128.83	23.6	152.43	190.83	38.4	Legal	Legal	Legal	Legal	Legal
10988	2013-10-01	1-16-2013	38	F	423682	16427013		SEVERE ANAMIA	MEDI06A		147.42	80.78	228.2	190.83	-37.37	Fradulent	Legal	Fraudulent	Fraudulent	Fraudulent
10989	2013-04-12	2013-12-01	77	F	382466	16448836		ANAMIA	MEDI06A		128.83	0.96	129.79	190.83	61.04	Legal	Legal	Legal	Legal	Legal
10990	2013-09-01	2013-11-01	36	F	423434	80178334		SEVERE ANAMIA	MEDI06A		128.83	4.06	132.89	190.83	57.94	Legal	Legal	Legal	Legal	Legal
11053	2012-12-28	2012-12-31	76	M	70020	16533792		ANEAMIA	MEDI06A	D51.9	128.83	11.5	140.33	190.83	50.5	Legal	Legal	Legal	Legal	Legal
11084	2012-12-20	2012-12-28	64	M	394402	52458162		SEVERE ANAEMIA	MEDI06A	D50.9	128.83	41.86	170.69	190.83	20.14	Legal	Legal	Legal	Legal	Legal
11086	2012-11-22	2012-12-26	16	F	416670	58416174		SEVERE ANAEMIA	MEDI06A	D51.9	147.42	8.96	156.38	190.83	34.45	Legal	Legal	Legal	Legal	Legal
10856	2012-12-08	2013-01-03	13	M	338510	65888527		HAERT FAILURE	MEDI07A	I50	155.87	21.82	177.69	247.68	69.99	Legal	Legal	Legal	Legal	Legal
10892	1-25-2013	1-30-2013	63	M	426024	16386982		HEART DISEASE	MEDI07A	I50.9	155.87	13.2	169.07	247.68	78.61	Legal	Legal	Legal	Legal	Legal
10895	1-21-2013	1-23-2013	53	M	232564	55451256		CCF	MEDI07A	I50.9	155.87	15	170.87	247.68	76.81	Legal	Legal	Legal	Legal	Legal
10896	2013-10-01	1-29-2013	39	F	127957	19597671		PLERAL EFFUSION	MEDI07A	I31.3	155.87	81.21	237.08	247.68	10.6	Legal	Legal	Legal	Legal	Legal
10909	2013-09-01	2013-12-01	60	F	408469	69626751		CONGESTIVE CARDIAC	MEDI07A	I50.9	155.87	9.8	165.67	247.68	82.01	Legal	Legal	Legal	Legal	Legal
10913	1-17-2013	1-19-2013	27	F	423995	82719059		CONGESTIVE CARDIAC FAILURE	MEDI07A	I50.9	155.87	3.2	159.07	247.68	88.61	Legal	Legal	Legal	Legal	Legal
10931	1-18-2013	1-21-2013	69	F	424987	68534588		CONGESTIVE CARDIAC FAILURE	MEDI07A	I50.9	155.87	25.1	180.97	247.68	66.71	Legal	Legal	Legal	Legal	Legal
10943	1-23-2013	1-27-2013	41	M	425800	73584632		CONGESTIVE CARDIAC FAILURE	MEDI07A	I50.9	155.87	14.85	170.72	247.68	76.96	Legal	Legal	Legal	Legal	Legal
10985	2013-11-01	1-15-2013	77	M	422747	64589845		CONGESTIVE CARDIA FAILURE	MEDI07A		155.87	2.7	158.57	247.68	89.11	Legal	Legal	Legal	Legal	Legal
10987	2013-07-01	1-14-2013	67	F	36021	16426957		HYPERTENSION	MEDI07A		155.87	31.23	187.1	247.68	60.58	Legal	Legal	Legal	Legal	Legal
11044	2012-12-28	2012-12-30	89	F	421790	16474096		CONGESTIVE CARDIAC FAILURE	MEDI07A	I50.9	155.87	48.44	204.31	247.68	43.37	Legal	Legal	Legal	Legal	Legal
11058	2012-12-13	2012-12-28	89	M	419660	16513223		CONGESTIVE CARDIAC FAILURE	MEDI07A	I50.9	155.87	314.04	469.91	247.68	-222.23	Fradulent	Legal	Fraudulent	Fraudulent	Fraudulent
11064	2012-12-15	2012-12-23	77	M	419725	16429980		HEART DISEASE	MEDI07A	I50.9	158.47	162.13	320.6	247.68	-72.92	Fradulent	Legal	Fraudulent	Fraudulent	Fraudulent
10950	2013-03-01	2013-06-01	71	F	422480	75130904		OLD CEREBROVASCULAR ACCIDENT	MEDI14A	I64	128.18	60.5	188.68	231.42	42.74	Legal	Legal	Legal	Legal	Legal
10969	1-28-2013	2013-01-02	73	M	389939	16395886		CEREBROVASCULAR ACCIDENT	MEDI14A		128.18	165.85	294.03	231.42	-62.61	Fradulent	Legal	Fraudulent	Fraudulent	Fraudulent
11041	2012-12-14	2012-12-30	69	F	419882	80621444		CEREBRO VASCULAR ACCIDENT	MEDI14A	I64	128.18	333.41	461.59	231.42	-230.17	Fradulent	Legal	Fraudulent	Fraudulent	Fraudulent
11043	2012-12-25	2012-12-27	35	F	420171	30968375		SEVERE HYPERTENSION	MEDI14A	I64	128.18	16.62	144.8	231.42	86.62	Legal	Legal	Legal	Legal	Legal
11055	2012-12-16	2012-12-28	60	F	419008	84609748		CEREBRO VASCULAR ACCIDENT	MEDI14A	I64	128.18	268.27	396.45	231.42	-165.03	Fradulent	Legal	Fraudulent	Fraudulent	Fraudulent
11060	2012-12-19	2012-12-27	67	F	420552	84192405		CEREBRO VASCULAR ACCIDENT	MEDI14A	I64	104.65	134.12	238.77	231.42	-7.35	Fradulent	Legal	Fraudulent	Fraudulent	Fraudulent
11071	2012-12-19	2012-12-21	45	M	420468	16422350		CEREBRO VASCULAR ACCIDENT	MEDI14A	I64	128.18	48.66	176.84	231.42	54.58	Legal	Legal	Legal	Legal	Legal
11083	2012-12-20	2012-12-27	82	F	387954	44679240		CEREBRO VASCULAR ACCIDENT	MEDI14A	I64	128.18	223.82	352	231.42	-120.58	Fradulent	Legal	Fraudulent	Fraudulent	Fraudulent
10832	2013-01-01	2013-01-06	21	F	226570	16538099		SICKLE CELL DISEASE	MEDI16A	D57.1	123.11	31.17	154.28	179.85	25.57	Legal	Fraudulent	Fraudulent	Fraudulent	Fraudulent
10862	2013-01-03	2013-01-07	18	M	287520	58748433		SICKLE CELL DISEASE(CRISIS)	MEDI16A	D57.1	123.11	52.9	176.01	179.85	3.84	Legal	Legal	Legal	Legal	Legal
10872	2013-01-22	2013-01-25	16	F	372290	82938058		SICKLE CELL DISEASE	MEDI16A	D57.1	123.11	19.06	142.17	179.85	37.68	Legal	Legal	Legal	Legal	Legal
10911	1-16-2013	1-20-2013	15	F	177977	16483632		SICKLE CELL DISEASE	MEDI16A	D57.1	123.11	97.77	220.88	179.85	-41.03	Fradulent	Fraudulent	Fraudulent	Fraudulent	Fraudulent
10921	1-17-2013	1-20-2013	34	F	269866	67135672		MALARIA	MEDI16A	D57.1	123.11	39.8	162.91	179.85	16.94	Legal	Legal	Legal	Legal	Legal
10933	1-15-2013	1-18-2013	15	F	177977	16483632		SICKLE CELL DISEASE	MEDI16A	D57.1	117.65	210.14	327.79	179.85	-147.94	Fradulent	Fraudulent	Fraudulent	Fraudulent	Fraudulent
10955	1-17-2013	1-24-2013	27	F	424927	61272094		SCD	MEDI16A		123.11	49.26	172.37	179.85	7.48	Legal	Legal	Legal	Legal	Legal
10956	1-14-2013	1-17-2013	21	M	25994	16356550		SCD	MEDI16A		170.43	34.93	205.36	179.85	-25.51	Fradulent	Legal	Fraudulent	Fraudulent	Fraudulent
10965	1-14-2013	1-24-2013	12	M	44586	16476035		MALARIA SERVERE	MEDI16A		123.11	118.43	241.54	179.85	-61.69	Fradulent	Fraudulent	Fraudulent	Fraudulent	Fraudulent
10967	1-22-2013	1-25-2013	23	M	338438	57179669		SCD	MEDI16A		123.11	29.01	152.12	179.85	27.73	Legal	Legal	Legal	Legal	Legal
10968	1-23-2013	1-29-2013	20	F	425695	68647912		SCD	MEDI16A		123.11	53.49	176.6	179.85	3.25	Legal	Legal	Legal	Legal	Legal
10991	2013-09-01	2013-11-01	14	F	395566	15605453		SCD	MEDI16A		123.11	36.91	160.02	179.85	19.83	Legal	Legal	Legal	Legal	Legal
10996	2013-04-01	2013-10-01	14	M	44586	16476035		SEVERE ANAMIA	MEDI16A		123.11	41.9	165.01	179.85	14.84	Legal	Fraudulent	Fraudulent	Fraudulent	Fraudulent
11002	2013-01-01	2013-03-01	21	F	61694	16505227		SCD	MEDI16A		123.11	24	147.11	179.85	32.74	Legal	Legal	Legal	Legal	Legal
11042	2012-12-27	2012-12-30	20	F	226570	16538099		SICKLE CELL DISEASES	MEDI16A	I57.9	123.11	32.2	155.31	179.85	24.54	Legal	Fraudulent	Fraudulent	Fraudulent	Fraudulent
11072	2012-12-22	2012-12-24	27	M	420707	62890156		SICKLE CELL WITH VASCOCELUTIVE CRISIS	MEDI16A	D57.1	123.11	9	132.11	179.85	47.74	Legal	Legal	Legal	Legal	Legal
11090	2012-12-10	2012-12-13	28	F	419302	66988738		SICKLE CELL DISEASE	MEDI16A	D57.1	123.11	26.06	149.17	179.85	30.68	Legal	Legal	Legal	Legal	Legal
10833	2012-12-30	2013-01-05	81	M	422093	79413442		UPPER GI BLEEDING	MEDI17A	D68.9	168.35	145.98	314.33	249.55	-64.78	Fradulent	Legal	Fraudulent	Fraudulent	Fraudulent
10962	2016-12-13	2013-01-02	41	F	419662	52096193		EXTENSIVE BURNS	MEDI18A		316.68	107.56	424.24	388.6	-35.64	Fradulent	Legal	Fraudulent	Fraudulent	Fraudulent
11074	2012-12-07	2012-12-24	73	F	414633	87174962		BURNS	MEDI18A	T30.0	316.68	305.55	622.23	388.6	-233.63	Fradulent	Legal	Fraudulent	Fraudulent	Fraudulent
11000	2013-05-01	2013-08-01	64	F	423010	58607252		HYPERTENSION	MEDI20A		104.65	46.2	150.85	306.15	155.3	Legal	Legal	Legal	Legal	Legal
11059	2012-12-22	2012-12-26	22	M	421048	60787021		CHRONIC RENSL FAILURE	MEDI20A	N18.9	123.37	34.48	157.85	306.15	148.3	Legal	Legal	Legal	Legal	Legal
10847	2013-01-25	2013-01-27	25	F	420929	28537829		ACUTE ASTHMATIC ATTSCK	MEDI22A	I45.9	65.52	84.84	150.36	126.81	-23.55	Fradulent	Legal	Fraudulent	Fraudulent	Fraudulent
10773	2012-12-15	2012-12-20	39	F	419910	16488171	E.O.U	THREATENG ABORTION	OBGY06A	OO6	64.09	20.21	84.3	101.46	17.16	Legal	Legal	Legal	Legal	Legal
10778	2012-12-13	2012-12-20	37	F	419658	87890732	E.O.U	INEVITABLE ABORTION	OBGY06A	OO6	72.8	33.86	106.66	101.46	-5.2	Fradulent	Legal	Fraudulent	Fraudulent	Fraudulent
10779	2012-12-17	2012-12-20	36	F	268158	76313282	E.O.U	RETAINED PLACENTA	OBGY06A	OO6	72.8	40.9	113.7	101.46	-12.24	Fradulent	Legal	Fraudulent	Fraudulent	Fraudulent
10169	2012-12-30	2013-01-01	19	F	387473	69991605		PRAPERAL SEPSIS	OBGY09A	O26.9	64.09	39.22	103.31	78.8	-24.51	Fradulent	Legal	Fraudulent	Fraudulent	Fraudulent
10225	2013-01-06	2013-01-07	39	F	380623	73699782		BLEEDING UTERINE FAROID	OBGY09A	O26.9	64.09	1.16	65.25	78.8	13.55	Legal	Legal	Legal	Legal	Legal
10226	2012-12-26	2013-01-07	33	F	408279	61273124		GESTATIONAL DIABETES	OBGY09A	O26.10	64.09	56	120.09	78.8	-41.29	Fradulent	Legal	Fraudulent	Fraudulent	Fraudulent
10235	2013-01-05	2013-01-08	40	F	423017	84729269	ANTE NATAL	PREMATURE RUOTURE OF MEMBRENES	OBGY09A	O26.9	64.09		64.09	78.8	14.71	Legal	Legal	Legal	Legal	Legal
10245	2013-01-07	2013-01-08	22	F	423039	55473020		URENERY TRACT INFECTION	OBGY09A	26.9	64.09	3.66	67.75	78.8	11.05	Legal	Legal	Legal	Legal	Legal
10311	2013-01-11	2013-01-12	25	F	408273	67373257		POST DATE	OBGY09A		64.09		64.09	78.8	14.71	Legal	Legal	Legal	Legal	Legal
10312	2013-01-09	2013-01-12	35	F	421886	16386299		CHRONIC HYPERTENSION	OBGY09A		64.09	27.06	91.15	78.8	-12.35	Fradulent	Legal	Fraudulent	Fraudulent	Fraudulent
10313	2013-01-10	2013-01-14	49	F	413512	16374885		DEGENERATING UTERINE FIBROID	OBGY09A	O26.9	64.09	11.9	75.99	78.8	2.81	Legal	Legal	Legal	Legal	Legal
10314	2013-01-14	2013-01-17	31	F	405540	82668005		CHRONIC HYPERTENSION	OBGY09A	O26.9	64.09	36.6	100.69	78.8	-21.89	Fradulent	Legal	Fraudulent	Fraudulent	Fraudulent
10358	2012-12-31	2013-01-03	34	F	355872	63290002		HYPEREMESIS GRAVIDARIUM	OBGY09A	O26.9	64.09	17.05	81.14	78.8	-2.34	Fradulent	Legal	Fraudulent	Fraudulent	Fraudulent
10359	2012-12-31	2013-01-02	35	F	393275	85890604		GASTOEUTENTS IN CYESIS	OBGY09A	O26.9	64.09	11.2	75.29	78.8	3.51	Legal	Fraudulent	Fraudulent	Fraudulent	Fraudulent
10360	2012-12-31	2013-01-03	30	F	422180	66666200		ECTOPIC GESTATION	OBGY09A	O26.9	64.09	33.6	97.69	78.8	-18.89	Fradulent	Legal	Fraudulent	Fraudulent	Fraudulent
10361	2012-12-28	2013-01-01	37	F	414517	87913400		HYPEREMESIS GRAVIDARIUM	OBGY09A	O26.9	64.09	22.25	86.34	78.8	-7.54	Fradulent	Legal	Fraudulent	Fraudulent	Fraudulent
10362	2012-12-29	2013-01-01	32	F	221513	50384777		INCOMPLETE ABORTION	OBGY09A	O26.9	64.09	4	68.09	78.8	10.71	Legal	Legal	Legal	Legal	Legal
10366	2013-01-17	2013-01-21	24	F	423860	17445273		ECLAMPSIA	OBGY09A	O26.9	64.09	143.16	207.25	78.8	-128.45	Fradulent	Legal	Fraudulent	Fraudulent	Fraudulent
10409	2013-01-11	2013-01-14	35	F	422696	89797739		MENORRHAGIA R/O ABORTION	OBGY09A	O26.9	64.09	33.36	97.45	78.8	-18.65	Fradulent	Legal	Fraudulent	Fraudulent	Fraudulent
10410	2013-01-08	2013-01-14	22	F	423310	86479829		INTRA UTERINE DEATH	OBGY09A	O26.9	64.09	43.18	107.27	78.8	-28.47	Fradulent	Legal	Fraudulent	Fraudulent	Fraudulent
10411	2012-12-29	2013-01-16	35	F	422023	68364250		CHRONIC HYPERTENSION IN CYESIS	OBGY09A	O26.9	64.09	73.7	137.79	78.8	-58.99	Fradulent	Legal	Fraudulent	Fraudulent	Fraudulent
10413	2013-01-10	2013-01-15	35	F	420952	85413176		PREVIOUS CAESAREAN SECTION AT TERM	OBGY09A		64.09		64.09	78.8	14.71	Legal	Legal	Legal	Legal	Legal
10414	2013-01-09	2013-01-15	18	F	419517	10465485		PREVIOUS CAESAREAN SECTION AT TERM	OBGY09A		64.09		64.09	78.8	14.71	Legal	Legal	Legal	Legal	Legal
10415	2013-01-16	2013-01-16	20	F	421882	16757277		PREGNANCY INDUCED	OBGY09A		64.09		64.09	78.8	14.71	Legal	Legal	Legal	Legal	Legal
10416	2013-01-09	2013-01-15	35	F	421873	88508880		CHRONIC HYPERTENSION	OBGY09A		64.09	29.88	93.97	78.8	-15.17	Fradulent	Legal	Fraudulent	Fraudulent	Fraudulent
10417	2013-01-11	2013-01-15	36	F	404454	82420373		PREVIOUS CAESAREAN SECTION AT TERM	OBGY09A		64.09		64.09	78.8	14.71	Legal	Legal	Legal	Legal	Legal
10418	2013-01-14	2013-01-15	24	F	423900	82303294		POSRT PARTUM EDAMPSIA	OBGY09A	O26.9	64.09	41.18	105.27	78.8	-26.47	Fradulent	Legal	Fraudulent	Fraudulent	Fraudulent
10419	2013-01-15	2013-01-17	31	F	419548	89126198		SEVERE PRE-ECLAMPSIA	OBGY09A	O26.9	64.09	47.64	111.73	78.8	-32.93	Fradulent	Legal	Fraudulent	Fraudulent	Fraudulent
10420	2013-01-16	2013-01-17	35	F	424315	67124115		EXCESSIVE VOMITING IN PREGNANCY	OBGY09A	O26.9	64.09	41.25	105.34	78.8	-26.54	Fradulent	Legal	Fraudulent	Fraudulent	Fraudulent
10421	2013-01-14	2013-01-16	30	F	417557	88737634		PLACENTA PRAAIG	OBGY09A	O26.9	64.09	12.96	77.05	78.8	1.75	Legal	Legal	Legal	Legal	Legal
10757	2013-01-22	2013-01-27	25	F	393065	82682360	CEASAREAN SECTION	FOETAL DISTRESS	OBGY32A	O26.9	231.14	92.03	323.17	312.69	-10.48	Fradulent	Legal	Fraudulent	Fraudulent	Fraudulent
10758	2013-01-22	2013-01-27	29	F	418656	16508596	CEASAREAN SECTION	PRE- ECLAMPSIA	OBGY32A	O26.9	231.14	77.72	308.86	312.69	3.83	Legal	Legal	Legal	Legal	Legal
10759	2013-01-23	2013-01-25	32	F	425563	84906425	CEASAREAN SECTION	C/S O/A SEVERE PRE-ECLAMPSIA	OBGY32A	O26.9	231.14	45.6	276.74	312.69	35.95	Legal	Legal	Legal	Legal	Legal
10760	2013-01-21	2013-01-25	28	F	213631	49454346	CEASAREAN SECTION	C/S O/A ANTEPARTUM HEMMORRHAGE	OBGY32A	O67.9	231.14	141.36	372.5	312.69	-59.81	Fradulent	Fraudulent	Fraudulent	Fraudulent	Fraudulent
10761	2013-01-23	2013-01-25	30	F	425094	56396896	CEASAREAN SECTION	C/S O/A RUPTURED UTERUS	OBGY32A	O26.9	231.14	130.34	361.48	312.69	-48.79	Fradulent	Legal	Fraudulent	Fraudulent	Fraudulent
10762	2013-01-21	2013-01-25	33	F	394122	78436803	CEASAREAN SECTION	LUSCS O/A EARLY PRIM TERM	OBGY32A	O26.9	231.14	83.28	314.42	312.69	-1.73	Fradulent	Legal	Fraudulent	Fraudulent	Fraudulent
10763	2013-01-22	2013-01-25	32	F	399081	23670661	CEASAREAN SECTION	C/S O/A 1 PREVIOUS	OBGY32A	O26.9	231.14	78.8	309.94	312.69	2.75	Legal	Legal	Legal	Legal	Legal
10764	2013-01-21	2013-01-25	25	F	389817	65572645	CEASAREAN SECTION	C/S O/A PROLONGED	OBGY32A	O26.9	231.14	98.43	329.57	312.69	-16.88	Fradulent	Legal	Fraudulent	Fraudulent	Fraudulent
10765	2013-01-22	2013-01-26	22	F	425395	65475446	CEASAREAN SECTION	LUSCS O/A ECLAMPSIA	OBGY32A	O26.9	231.14	85.06	316.2	312.69	-3.51	Fradulent	Fraudulent	Fraudulent	Fraudulent	Fraudulent
10766	2013-01-23	2013-01-27	28	F	425812	83663049	CEASAREAN SECTION	CEPHSLIC PELVIC	OBGY32A	O26.9	231.14	89.78	320.92	312.69	-8.23	Fradulent	Legal	Fraudulent	Fraudulent	Fraudulent
10767	2013-01-22	2013-01-27	36	F	406983	46842246	CEASAREAN SECTION	O/A PREVIOUS CAESAREAN SECTION	OBGY32A	O26.9	231.14	65.78	296.92	312.69	15.77	Legal	Legal	Legal	Legal	Legal
10768	2013-01-24	2013-01-27	26	F	398860	45040256	CEASAREAN SECTION	O/A 2PREVIOUS CAESAREAN SECTION	OBGY32A	O26.9	231.14	63.68	294.82	312.69	17.87	Legal	Legal	Legal	Legal	Legal
10769	2013-01-09	2013-01-21	26	F	412320	60374492	CEASAREAN SECTION	1PREVIOUS C/SECTION	OBGY32A	O26.9	231.14	167.02	398.16	312.69	-85.47	Fradulent	Legal	Fraudulent	Fraudulent	Fraudulent
10770	2013-01-09	2013-01-12	26	F	379543	78293449	CEASAREAN SECTION	PREVIOUS C/SECTION	OBGY32A	O26.9	231.14	25.52	256.66	312.69	56.03	Legal	Legal	Legal	Legal	Legal
10771	2012-12-18	2012-12-21	32	F	420336	83387164	CEASAREAN SECTION	OBSTRUCTED LABOUR	OBGY32A	O26.9	231.14	108.36	339.5	312.69	-26.81	Fradulent	Legal	Fraudulent	Fraudulent	Fraudulent
10777	2012-12-16	2012-12-19	32	F	420038	82669888	CEASAREAN SECTION	FETAL DISEASE, CPD	OBGY32A	P20	231.14	102.9	334.04	312.69	-21.35	Fradulent	Legal	Fraudulent	Fraudulent	Fraudulent
10780	2012-12-15	2012-12-19	35	F	415583	81620568	CEASAREAN SECTION	SEVERE PRE-ECLARPSIE	OBGY32A	O26.9	231.14	100.26	331.4	312.69	-18.71	Fradulent	Legal	Fraudulent	Fraudulent	Fraudulent
10782	2012-12-25	2012-12-31	31	F	417572	15730887	CEASAREAN SECTION	LUSCS PEREVS	OBGY32A	26.9	231.14	81.64	312.78	312.69	-0.09	Fradulent	Legal	Fraudulent	Fraudulent	Fraudulent
10783	2012-12-27	2012-12-31	23	F	401401	82610003	CEASAREAN SECTION	FOETAL DISTRESS	OBGY32A	P20	231.14	103.46	334.6	312.69	-21.91	Fradulent	Legal	Fraudulent	Fraudulent	Fraudulent
10784	2012-12-27	2012-12-31	30	F	421658	86528625	CEASAREAN SECTION	ABRUPTIO PLACENTA	OBGY32A	O26.9	231.14	60.88	292.02	312.69	20.67	Legal	Legal	Legal	Legal	Legal
10113	2016-01-01	2016-01-01	55	M	NP-30-13	35174927	ELECTRO THERAPY	LUMBAR SPONDYLASIS	OPDC011D		35.7		35.7	0	-35.7	Fradulent	Legal	Fraudulent	Fraudulent	Fraudulent
10114	2013-02-01	2013-02-01	57	F	2013-02-01	28589137	ELECTRO THERAPY	LOWBACK PAIN	OPDC011D		35.7		35.7	0	-35.7	Fradulent	Fraudulent	Fraudulent	Fraudulent	Fraudulent
10115	2013-10-12	2013-10-12	45	M	NP-1142-12	84367299	ELECTRO THERAPY	RT KNEE PAIN	OPDC011D		35.7		35.7	0	-35.7	Fradulent	Legal	Fraudulent	Fraudulent	Fraudulent
10116	2013-04-01	2013-04-01	49	F	1112-12	16504028	EXERCISE THERAPY	LT ROTATOR CUFF TENDINTIS	OPDC011D		35.7		35.7	0	-35.7	Fradulent	Legal	Fraudulent	Fraudulent	Fraudulent
10117	2013-04-01	2013-04-01	58	F	NP-1131-12	61819051	ELECTRO THERAPY	LUMBAR SPONDYLASIS	OPDC011D		35.7		35.7	0	-35.7	Fradulent	Legal	Fraudulent	Fraudulent	Fraudulent
10118	2013-04-01	2013-04-01	80	F	NP-1083-12	16365194	ELECTRO THERAPY	FOOT DROP	OPDC011D		35.7		35.7	0	-35.7	Fradulent	Legal	Fraudulent	Fraudulent	Fraudulent
10119	2013-02-01	2013-02-01	47	M	NP-1198-12	46800280	ELECTRO THERAPY	RT BELLS PALSY	OPDC011D		35.7		35.7	0	-35.7	Fradulent	Fraudulent	Fraudulent	Fraudulent	Fraudulent
10120	2013-09-01	2013-09-01	46	M	1198-12	46800280	ELECTRO THERAPY	RT BELLS PALSY	OPDC011D		35.7		35.7	0	-35.7	Fradulent	Fraudulent	Fraudulent	Fraudulent	Fraudulent
10121	2013-07-01	2013-07-01	56	M	NP-10-13	63601641	EXERCISE THERAPY	CVA	OPDC011D		35.7		35.7	0	-35.7	Fradulent	Legal	Fraudulent	Fraudulent	Fraudulent
10122	2013-09-01	2013-09-01	76	F	NP-20-13	17435564	ELECTRO THERAPY	CERVICAL SPONDYOSIS	OPDC011D		35.7		35.7	0	-35.7	Fradulent	Legal	Fraudulent	Fraudulent	Fraudulent
10123	2013-09-01	2013-09-01	46	M	NP-1172-12	61342925	ELECTRO THERAPY	LUMAR SPONDYLOSIS	OPDC011D		35.7		35.7	0	-35.7	Fradulent	Legal	Fraudulent	Fraudulent	Fraudulent
10124	1-18-2013	1-18-2013	9	M	NP-1186-12	75300892	THERMOTHERAPY	LIMITED ROM LT ELBOW	OPDC011D		35.7		35.7	0	-35.7	Fradulent	Legal	Fraudulent	Fraudulent	Fraudulent
10125	1-14-2013	1-14-2013	57	F	NP-02-13	28589137	THERMOTHERPY	PARAPARSIS	OPDC011D		35.7		35.7	0	-35.7	Fradulent	Fraudulent	Fraudulent	Fraudulent	Fraudulent
10126	1-15-2013	1-15-2013	52	M	NP-1180-12	16412107	ELECTRO THERAPY	LUMBAR SPONDYLOSIS	OPDC011D		35.7		35.7	0	-35.7	Fradulent	Legal	Fraudulent	Fraudulent	Fraudulent
1	2013-01-11	2013-01-11	28	F	389973	60394089			OPDC02A	80.9	13.27	0.66	13.93	22.13	8.2	Legal	Legal	Legal	Legal	Legal
2	2013-01-11	2013-01-11	30	F	408706	16462054			OPDC02A	80.9	13.27	0.06	13.33	22.13	8.8	Legal	Legal	Legal	Legal	Legal
3	2013-01-11	2013-01-11	30	F	415596	87649155			OPDC02A	80.9	13.27	0.66	13.93	22.13	8.2	Legal	Legal	Legal	Legal	Legal
4	2013-01-11	2013-01-11	28	F	419557	71405530			OPDC02A	80.9	13.27	0.36	13.63	22.13	8.5	Legal	Legal	Legal	Legal	Legal
5	2013-01-11	2013-01-11	27	F	413317	87675895			OPDC02A	80.9	13.27	0.36	13.63	22.13	8.5	Legal	Legal	Legal	Legal	Legal
6	2013-01-11	2013-01-11	33	F	226762	66335208			OPDC02A	80.9	13.27	0.56	13.83	22.13	8.3	Legal	Legal	Legal	Legal	Legal
7	2013-01-11	2013-01-11	30	F	415549	67414683			OPDC02A	80.9	13.27	0.36	13.63	22.13	8.5	Legal	Legal	Legal	Legal	Legal
9060	2013-07-01	2013-07-01	6	F	0074-13	64534311	CONSULTATION	CARIES	OPDC03A		4.88		4.88	11.6	6.72	Legal	Legal	Legal	Legal	Legal
9061	2013-08-01	2013-08-01	57	F	0101-13	24718581	CONSULTATION	GINGINTIS	OPDC03A		4.88		4.88	11.6	6.72	Legal	Legal	Legal	Legal	Legal
9063	2013-10-01	2013-10-01	20	F	4841-12	16359555	CONSULTATION	CARIES	OPDC03A		4.88		4.88	11.6	6.72	Legal	Legal	Legal	Legal	Legal
9066	2013-08-01	2013-08-01	17	M	0091-13	16519546	CONSULTATION	CARIES	OPDC03A		4.88		4.88	11.6	6.72	Legal	Legal	Legal	Legal	Legal
9067	2013-09-01	2013-09-01	27	M	0122-13	69453752	CONSULTATION	GINGINTIS	OPDC03A		4.88		4.88	11.6	6.72	Legal	Legal	Legal	Legal	Legal
9068	2013-10-01	2013-10-01	27	F	4816-12	84168848	CONSULTATION	CARIES	OPDC03A		4.88		4.88	11.6	6.72	Legal	Legal	Legal	Legal	Legal
9073	2013-10-01	2013-10-01	75	F	0040-13	59399725	CONSULTATION	DENTALVATION	OPDC03A		4.88		4.88	11.6	6.72	Legal	Legal	Legal	Legal	Legal
9074	2013-10-01	2013-10-01	45	M	0086-13	10734806	CONSULTATION	CARIES	OPDC03A		4.88		4.88	11.6	6.72	Legal	Legal	Legal	Legal	Legal
9078	2013-04-01	2013-04-01	58	M	2926-12	37947076	CONSULTATION	CARIES	OPDC03A		4.88		4.88	11.6	6.72	Legal	Legal	Legal	Legal	Legal
9081	1-21-2013	1-21-2013	40	F	4603-12	59710585	CONSULTATION	GINGINTIS	OPDC03A		4.88		4.88	11.6	6.72	Legal	Legal	Legal	Legal	Legal
9082	1-21-2013	1-21-2013	22	M	0271-13	64621059	CONSULTATION	APICALPERIODDICALITY	OPDC03A		4.88		4.88	11.6	6.72	Legal	Legal	Legal	Legal	Legal
9083	1-21-2013	1-21-2013	54	F	0273-13	62493862	CONSULTATION	PERIODITIS	OPDC03A		4.88		4.88	11.6	6.72	Legal	Legal	Legal	Legal	Legal
9084	1-18-2013	1-18-2013	23	M	0244-13	75926859	CONSULTATION	CARIES	OPDC03A		4.88		4.88	10.68	5.8	Legal	Legal	Legal	Legal	Legal
9085	2013-03-01	2013-03-01	15	F	399684	82207956			OPDC04A		5.81	24.7	30.51	10.68	-19.83	Fradulent	Legal	Fraudulent	Fraudulent	Fraudulent
9086	2013-03-01	2013-03-01	2	M	422559	70943081			OPDC04A		5.54	12	17.54	10.68	-6.86	Fradulent	Legal	Fraudulent	Fraudulent	Fraudulent
9087	2013-02-01	2013-02-01	16	M	422416	15670534			OPDC04A		5.81	4.9	10.71	10.68	-0.03	Fradulent	Legal	Fraudulent	Fraudulent	Fraudulent
9088	2013-02-01	2013-02-01	9	F	422415	44891004			OPDC04A		5.54	3.62	9.16	10.68	1.52	Legal	Legal	Legal	Legal	Legal
9089	2013-02-01	2013-02-01	38	F	422398	52640264			OPDC04A		8.35	18.4	26.75	10.68	-16.07	Fradulent	Legal	Fraudulent	Fraudulent	Fraudulent
9090	2013-02-01	2013-02-01	6	M	236662	88513681			OPDC04A		5.54	6.02	11.56	10.68	-0.88	Fradulent	Legal	Fraudulent	Fraudulent	Fraudulent
9091	2013-03-01	2013-03-01	51	F	373491	64242046			OPDC04A		5.81	10.5	16.31	10.68	-5.63	Fradulent	Legal	Fraudulent	Fraudulent	Fraudulent
9092	2013-03-01	2013-03-01	9	F	422629	15757129			OPDC04A		5.51	11.83	17.34	10.68	-6.66	Fradulent	Legal	Fraudulent	Fraudulent	Fraudulent
9093	2013-04-01	2013-04-01	33	F	424096	56431010			OPDC04A		5.81	6.58	12.39	10.68	-1.71	Fradulent	Legal	Fraudulent	Fraudulent	Fraudulent
9094	1-14-2013	1-14-2013	21	M	424201	80460525			OPDC04A		5.81	15.4	21.21	10.68	-10.53	Fradulent	Legal	Fraudulent	Fraudulent	Fraudulent
9095	2013-04-01	2013-04-01	34	F	418500	82284383			OPDC04A		5.81	1.2	7.01	10.68	3.67	Legal	Legal	Legal	Legal	Legal
9096	1-14-2013	1-14-2013	57	F	39478	16368210			OPDC04A		5.81	27.5	33.31	10.68	-22.63	Fradulent	Legal	Fraudulent	Fraudulent	Fraudulent
9097	1-14-2013	1-14-2013	3	M	414100	58700045			OPDC04A		5.51	12.63	18.14	10.68	-7.46	Fradulent	Legal	Fraudulent	Fraudulent	Fraudulent
9098	1-14-2013	1-14-2013	64	F	424206	66494350			OPDC04A		5.81	4.2	10.01	10.68	0.67	Legal	Legal	Legal	Legal	Legal
9099	1-14-2013	1-14-2013	29	F	1172105	16501293			OPDC04A		5.81	7.2	13.01	10.68	-2.33	Fradulent	Legal	Fraudulent	Fraudulent	Fraudulent
9100	1-14-2013	1-14-2013	24	M	424133	65779240			OPDC04A		5.81	7.2	13.01	10.68	-2.33	Fradulent	Legal	Fraudulent	Fraudulent	Fraudulent
9101	1-14-2013	1-14-2013	31	M	419239	58421778			OPDC04A		5.81	0.7	6.51	10.68	4.17	Legal	Legal	Legal	Legal	Legal
9102	2013-08-01	2013-08-01	68	M	420469	72486792			OPDC04A		5.81	0.7	6.51	10.68	4.17	Legal	Legal	Legal	Legal	Legal
9103	1-14-2013	1-14-2013	47	F	393943	61207836			OPDC04A		5.81	4.7	10.51	10.68	0.17	Legal	Legal	Legal	Legal	Legal
9726	2013-10-01	2013-10-01	19	F	139-13	50992175			OPDC05A		6.34		6.34	11.39	5.05	Legal	Legal	Legal	Legal	Legal
9727	1-14-2013	1-14-2013	13	F	5471-11	52510002			OPDC05A		6.34		6.34	11.39	5.05	Legal	Legal	Legal	Legal	Legal
9728	1-14-2013	1-14-2013	25	F	879-10	16509438			OPDC05A		6.34		6.34	11.39	5.05	Legal	Legal	Legal	Legal	Legal
9436	2013-08-01	2013-08-01	7	M	108-13	80893531			OPDC05C		6.15	5.3	11.45	11.39	-0.06	Fradulent	Legal	Fraudulent	Fraudulent	Fraudulent
9442	2013-10-01	2013-10-01	10	F	3781-11	16496585			OPDC05C		6.15	2.1	8.25	11.39	3.14	Legal	Legal	Legal	Legal	Legal
9611	1-31-2013	1-31-2013	2	F	6524-12	67966522			OPDC05C		6.15		6.15	11.39	5.24	Legal	Legal	Legal	Legal	Legal
9625	1-22-2013	1-22-2013	5	M	6491-123	85288439			OPDC05C		6.15		6.15	11.39	5.24	Legal	Legal	Legal	Legal	Legal
9648	1-22-2013	1-22-2013	5	F	2457-12	86597914			OPDC05C		6.15		6.15	11.39	5.24	Legal	Legal	Legal	Legal	Legal
9664	1-15-2013	1-15-2013	4	F	248-13	67240780			OPDC05C		6.15		6.15	11.39	5.24	Legal	Legal	Legal	Legal	Legal
9672	1-15-2013	1-15-2013	3	F	240-13	82563392			OPDC05C		6.15		6.15	11.39	5.24	Legal	Legal	Legal	Legal	Legal
9677	1-15-2013	1-15-2013	7	M	1498-12	37277316			OPDC05C		6.15		6.15	11.39	5.24	Legal	Legal	Legal	Legal	Legal
9695	1-14-2013	1-14-2013	2	F	205-13	86219801			OPDC05C		6.15		6.15	11.39	5.24	Legal	Legal	Legal	Legal	Legal
9697	1-14-2013	1-14-2013	8	M	198-18	73632627			OPDC05C		6.15		6.15	11.39	5.24	Legal	Legal	Legal	Legal	Legal
9703	1-15-2013	1-15-2013	3	F	1613-12	75271913			OPDC05C		6.15		6.15	11.39	5.24	Legal	Legal	Legal	Legal	Legal
9714	1-14-2013	1-14-2013	11	M	5447-11	67327109			OPDC05C		6.15		6.15	11.39	5.24	Legal	Legal	Legal	Legal	Legal
9719	2013-10-01	2013-10-01	4	F	4512-12	82291500			OPDC05C		6.15		6.15	11.39	5.24	Legal	Legal	Legal	Legal	Legal
9729	1-14-2013	1-14-2013	1	F	187-13	83994237			OPDC05C		6.15		6.15	11.39	5.24	Legal	Legal	Legal	Legal	Legal
9730	1-14-2013	1-14-2013	3	F	180-13	82764401			OPDC05C		6.15		6.15	11.39	5.24	Legal	Legal	Legal	Legal	Legal
1974	2013-01-12	2013-01-12	25	F	404980	81880512			OPDC06A		6.16	9.15	15.31	12.85	-2.46	Fradulent	Legal	Fraudulent	Fraudulent	Fraudulent
1975	2013-12-11	2013-12-11	17	F	418581	85661459			OPDC06A		6.16		6.16	12.85	6.69	Legal	Legal	Legal	Legal	Legal
1976	2013-01-08	2013-01-08	51	F	245575	41580440			OPDC06A		6.16	26.3	32.46	12.85	-19.61	Fradulent	Legal	Fraudulent	Fraudulent	Fraudulent
1977	2013-01-08	2013-01-08	30	F	ART 4410	66151741			OPDC06A		6.16	7.7	13.86	12.85	-1.01	Fradulent	Legal	Fraudulent	Fraudulent	Fraudulent
1978	2013-01-08	2013-01-08	56	M	418469	16460499			OPDC06A		6.16	93.3	99.46	12.85	-86.61	Fradulent	Legal	Fraudulent	Fraudulent	Fraudulent
1979	2013-01-08	2013-01-08	77	F	423318	16372108			OPDC06A		6.16	2.5	8.66	12.85	4.19	Legal	Legal	Legal	Legal	Legal
1980	2013-01-08	2013-01-08	56	M	423341	17215743			OPDC06A		6.16	13.26	19.42	12.85	-6.57	Fradulent	Legal	Fraudulent	Fraudulent	Fraudulent
1981	2013-01-08	2013-01-08	55	F	243818	16358051			OPDC06A		6.16	12.6	18.76	12.85	-5.91	Fradulent	Legal	Fraudulent	Fraudulent	Fraudulent
1982	2013-01-08	2013-01-08	28	F	183796	36200339			OPDC06A		6.16	4.9	11.06	12.85	1.79	Legal	Legal	Legal	Legal	Legal
1983	2013-01-02	2013-01-02	73	M	371475	16529930			OPDC06A		6.16		6.16	12.85	6.69	Legal	Legal	Legal	Legal	Legal
1984	2013-01-02	2013-01-02	30	M	92884	16454362			OPDC06A		6.16	37.3	43.46	12.85	-30.61	Fradulent	Legal	Fraudulent	Fraudulent	Fraudulent
6981	2013-08-01	2013-08-01	6	F	351911	16448638			OPDC06C		5.98	1.2	7.18	11.93	4.75	Legal	Legal	Legal	Legal	Legal
7010	2013-10-01	2013-10-01	5	F	423622	79473520			OPDC06C		5.98	1.5	7.48	11.93	4.45	Legal	Legal	Legal	Legal	Legal
7017	2013-11-01	2013-11-01	1	F	421245	86018860			OPDC06C		5.98	2.25	8.23	11.93	3.7	Legal	Legal	Legal	Legal	Legal
7022	2013-11-01	2013-11-01	2	F	329426	84366535			OPDC06C		5.98	12.25	18.23	11.93	-6.3	Fradulent	Legal	Fraudulent	Fraudulent	Fraudulent
7026	2013-11-01	2013-11-01	6	F	423756	79319521			OPDC06C		5.98		5.98	11.93	5.95	Legal	Legal	Legal	Legal	Legal
7027	2013-11-01	2013-11-01	1	F	365964	79941653			OPDC06C		5.98		5.98	11.93	5.95	Legal	Legal	Legal	Legal	Legal
7029	2013-11-01	2013-11-01	9	M	423755	79318760			OPDC06C		5.98		5.98	11.93	5.95	Legal	Legal	Legal	Legal	Legal
7030	2013-11-01	2013-11-01	11	F	384178	50894367			OPDC06C		8.78	1.61	10.39	11.93	1.54	Legal	Legal	Legal	Legal	Legal
7031	2013-11-01	2013-11-01	2	F	370577	78704881			OPDC06C		5.98	1.65	7.63	11.93	4.3	Legal	Legal	Legal	Legal	Legal
7035	2013-11-01	2013-11-01	3	F	423732	66623008			OPDC06C		5.98	1.2	7.18	11.93	4.75	Legal	Legal	Legal	Legal	Legal
7037	2013-11-01	2013-11-01	1	F	362716	83312046			OPDC06C		8.78	0.2	8.98	11.93	2.95	Legal	Legal	Legal	Legal	Legal
7038	2013-11-01	2013-11-01	2	F	423784	69521768			OPDC06C		5.98	1	6.98	11.93	4.95	Legal	Legal	Legal	Legal	Legal
7040	2013-11-01	2013-11-01	2	F	372705	63329552			OPDC06C		5.98		5.98	11.93	5.95	Legal	Legal	Legal	Legal	Legal
7049	2013-11-01	2013-11-01	1	F	423761	82725443			OPDC06C		5.98	1.38	7.36	11.93	4.57	Legal	Legal	Legal	Legal	Legal
7052	2013-06-01	2013-06-01	9	F	330367	16445181			OPDC06C		8.78	7	15.78	11.93	-3.85	Fradulent	Legal	Fraudulent	Fraudulent	Fraudulent
7059	2013-11-01	2013-11-01	3	F	347522	59844113			OPDC06C		5.98	2.65	8.63	11.93	3.3	Legal	Legal	Legal	Legal	Legal
7066	2013-11-01	2013-11-01	1	F	408824	85433975			OPDC06C		5.98		5.98	11.93	5.95	Legal	Legal	Legal	Legal	Legal
7073	2013-11-01	2013-11-01	1	F	356043	81073257			OPDC06C		5.98		5.98	11.93	5.95	Legal	Legal	Legal	Legal	Legal
7082	2013-11-01	2013-11-01	2	F	342616	66774823			OPDC06C		5.98		5.98	11.93	5.95	Legal	Legal	Legal	Legal	Legal
7084	2013-11-01	2013-11-01	3	F	282489	53114053			OPDC06C		5.98	0.06	6.04	11.93	5.89	Legal	Legal	Legal	Legal	Legal
7087	2013-11-01	2013-11-01	8	F	259582	61199680			OPDC06C		5.98	1.81	7.79	11.93	4.14	Legal	Legal	Legal	Legal	Legal
10035	12-20-2012	12-20-2012	30	F	420584	45796631	BANDAGING		ORTH01A		38.48		38.48	53.83	15.35	Legal	Legal	Legal	Legal	Legal
10040	12-24-2012	12-24-2012	53	M	311009	66208775	BANDAGING	FRACTURE	ORTH01A		49.14		49.14	53.83	4.69	Legal	Legal	Legal	Legal	Legal
10016	1-25-2013	1-25-2013	54	F	425198	82799732	BANDAGING	FIBULA FRACTURE	ORTH01C		36.14		36.14	50.57	14.43	Legal	Legal	Legal	Legal	Legal
10017	1-24-2013	1-24-2013	62	M	425897	16495533	BANDAGING	COLLIES FRACYURE	ORTH01C		36.14		36.14	50.57	14.43	Legal	Legal	Legal	Legal	Legal
10022	2013-07-01	2013-07-01	49	M	421304	63369414	BANDAGING	FRACTURED	ORTH01C		36.14		36.14	50.57	14.43	Legal	Legal	Legal	Legal	Legal
10023	2013-04-01	2013-04-01	12	M	422807	16439100	BANDAGING	FRACTURED	ORTH01C		36.14	0.41	36.55	50.57	14.02	Legal	Legal	Legal	Legal	Legal
10025	1-29-2013	1-29-2013	71	F	1009499	16473134	BANDAGING	FRACTURED	ORTH01C		46.02		46.02	50.57	4.55	Legal	Legal	Legal	Legal	Legal
10026	1-29-2013	1-29-2013	8	M	422156	16458870	BANDAGING		ORTH01C		46.02		46.02	50.57	4.55	Legal	Legal	Legal	Legal	Legal
10027	1-28-2013	1-28-2013	7	M	426095	38061628	BANDAGING		ORTH01C		46.02		46.02	50.57	4.55	Legal	Legal	Legal	Legal	Legal
10029	1-29-2013	1-29-2013	3	M	342118	71868280	BANDAGING		ORTH01C		46.02		46.02	50.57	4.55	Legal	Legal	Legal	Legal	Legal
10045	12-27-2012	12-27-2012	32	M	421268	81363087	EXCISTION		ORTH07A		85.93		85.93	150.28	64.35	Legal	Legal	Legal	Legal	Legal
10019	2013-08-01	2013-08-01	24	F	363272	53381522	INASIAN AND DRESSING	ADSCESS LT THURB	ORTH11A		123.24	10.3	133.54	172.88	39.34	Legal	Legal	Legal	Legal	Legal
11269	2012-01-02	2013-01-21	7	M	422488	81236976		FRACTURE OF TIBA/FIBIELAR	ORTH12C	T14.2	361.53	34.89	396.42	454.16	57.74	Legal	Legal	Legal	Legal	Legal
11268	2012-12-26	2013-01-18	13	F	420480	43887013	ABOVE KNEE AMPITATION	AMPUTSTION	ORTH21A	R02	368.94	274.99	643.93	0	-643.93	Fradulent	Legal	Fraudulent	Fraudulent	Fraudulent
11272	2012-11-01	2012-12-27	72	M	412907	16422223	RIGHT ABOVEL. AMPUTATIVE	DIABETIC FOOT ULCER	ORTH21A	RO2	368.94	643.83	1012.77	0	-1012.77	Fradulent	Legal	Fraudulent	Fraudulent	Fraudulent
11273	2012-11-22	2012-12-21	63	M	365667	16510280	AMPUTATION	DIABETIC GARGRENOUS FOOT	ORTH21A	RO3	368.94	359.41	728.35	0	-728.35	Fradulent	Legal	Fraudulent	Fraudulent	Fraudulent
11265	2012-11-03	2013-01-04	28	M	413850	86144989	FASCIOTOMY	SUPERFICIAL BURNS	ORTHO9A	T30.0	412.75	40.78	453.53	473.7	20.17	Legal	Legal	Legal	Legal	Legal
11266	2013-01-01	2013-01-21	28	M	369874	45896728	FASCIOTOMY	BURNS	ORTHO9A	T30.0	412.75	28.7	441.45	473.7	32.25	Legal	Legal	Legal	Legal	Legal
11267	2012-12-31	2013-01-04	37	M	421276	25165445	FASCIOTOMY	SUPERFICIAL BURNS	ORTHO9A	T30.0	412.75	23.7	436.45	473.7	37.25	Legal	Legal	Legal	Legal	Legal
11270	2013-01-02	2013-01-21	64	F	125510	16391314	ABOVE KNEE AMPITATION		ORTHO9A	202	368.94	337	705.94	473.7	-232.24	Fradulent	Legal	Fraudulent	Fraudulent	Fraudulent
11154	2013-01-19	2013-01-22	1	F	420357	89406321		PREMATURITY	PAED10C	PO7.0	197.34	2.2	199.54	299	99.46	Legal	Legal	Legal	Legal	Legal
11181	2013-01-08	2013-01-10	2	F	423491	65572542		DISLOCATION OF HIP JOINT	PAED10C		197.34	2.85	200.19	299	98.81	Legal	Legal	Legal	Legal	Legal
11198	2013-01-15	2013-01-17	3DY	F	424869	69662849		MILD HIE	PAED10C		197.34	1.4	198.74	299	100.26	Legal	Legal	Legal	Legal	Legal
11199	2013-01-01	2013-01-03	1DY	F	422405	65053596		MECONIUM STAINED	PAED10C		197.34	3.95	201.29	299	97.71	Legal	Legal	Legal	Legal	Legal
11201	2013-01-11	2013-01-20	9DY	F	424041	85890604		LOW BIRTH WEIGHT	PAED10C	P07.0	197.34	2.3	199.64	299	99.36	Legal	Fraudulent	Fraudulent	Fraudulent	Fraudulent
11202	2013-01-17	2013-01-20	3	F	319714	58717350		LOW BIRTH WEIGHT	PAED10C	P07.0	197.34	3.65	200.99	299	98.01	Legal	Legal	Legal	Legal	Legal
11209	2013-01-10	2013-01-18	15DY	F	398909	76565682		TOXIC EPIDERAL HEOROLYSIS	PAED10C		197.34	13.1	210.44	299	88.56	Legal	Legal	Legal	Legal	Legal
11217	2013-01-22	2013-01-28	3DY	F	425561	84672096		NEONATAL JAUNDICE	PAED10C	P59.9	125.32	3.5	128.82	299	170.18	Legal	Legal	Legal	Legal	Legal
11222	2013-01-18	2013-01-20	1DY	F	404854	85154434		THICK MECONIUM STAINED	PAED10C		197.34	2.65	199.99	299	99.01	Legal	Legal	Legal	Legal	Legal
11223	2013-01-21	2013-01-24	1DY	F	425861	82074337		THICK MECONIUM STAINED	PAED10C		197.34	2.65	199.99	299	99.01	Legal	Legal	Legal	Legal	Legal
11225	2013-01-10	2013-01-12	1DY	F	423660	85135930		PREMATURITY	PAED10C	P07.0	197.34	2.65	199.99	299	99.01	Legal	Legal	Legal	Legal	Legal
11218	2013-01-27	2013-01-29	1DY	F	426191	83357114		HYPOXIC ISEHEMA	PAED12C		119.73	3.9	123.63	196.67	73.04	Legal	Legal	Legal	Legal	Legal
11226	2013-01-09	2013-01-13	2DY	M	423466	81861987		SEVERE BIRTH ASPHUXIA	PAED12C		119.73	3.83	123.56	196.67	73.11	Legal	Legal	Legal	Legal	Legal
11231	2013-01-03	2013-01-08	5DY	F	423364	62832961		MECONIUM STAINED	PAED12C		119.73	5.35	125.08	196.67	71.59	Legal	Legal	Legal	Legal	Legal
11238	2013-01-06	2013-01-08	2DY	M	423363	83442645		MECONIUM STAINED	PAED12C		119.73	0.6	120.33	196.67	76.34	Legal	Legal	Legal	Legal	Legal
11249	2012-11-10	2012-11-13	1	F	414998	62877113		MATERNAL BLOOD ASPIRATION	PAED12C		119.73	3.15	122.88	196.67	73.79	Legal	Legal	Legal	Legal	Legal
11258	2012-12-22	2012-12-27	1	F	420994	87916006		SEVERE BIRTH ASPHYK	PAED12C		119.73	6.15	125.88	196.67	70.79	Legal	Legal	Legal	Legal	Legal
11242	2013-01-04	2013-01-09	2	F	422831	67492893		RESPIRATERY DISTRESS	PAED13C	P220	249.99	4.6	254.59	437.49	182.9	Legal	Legal	Legal	Legal	Legal
11140	2012-12-31	2013-01-10	1	F	422252	82603955		NEONATAL SEPSIS	PAED14C	A41.9	202.28	2.65	204.93	259.05	54.12	Legal	Legal	Legal	Legal	Legal
11142	2013-01-18	2013-01-22	2	F	422371	89592971		NEONATAI SEPSIS	PAED14C	A14.9	202.28	0.7	202.98	259.05	56.07	Legal	Legal	Legal	Legal	Legal
11143	2013-01-15	2013-01-22	1	F	424436	56975613		NEONATAL SEPSIS	PAED14C	A14.9	202.28	9.3	211.58	259.05	47.47	Legal	Legal	Legal	Legal	Legal
11146	2013-01-08	2013-01-10	1	F	423291	62976701		SEPSIS	PAED14C	A41.9	202.28	2.33	204.61	259.05	54.44	Legal	Legal	Legal	Legal	Legal
11147	2013-01-19	2013-01-20	1	F	425065	85986330		SEVERE BIRTH ASPHUXIA	PAED14C		119.73	2.65	122.38	259.05	136.67	Legal	Legal	Legal	Legal	Legal
11151	2013-01-21	2013-01-24	1	F	425908	65475446		EARLY NEONATAL SEPSIS	PAED14C	A14.9	202.28	2.65	204.93	259.05	54.12	Legal	Fraudulent	Fraudulent	Fraudulent	Fraudulent
11152	2013-01-21	2013-01-24	1	F	424873	82248089		stabel baby	PAED14C	A41.9	202.28	2.65	204.93	259.05	54.12	Legal	Legal	Legal	Legal	Legal
11157	2013-01-21	2013-01-04	5	M	374108	37561366		BRONCHOPNEUMONIA	PAED14C	J18.9	130	84.49	214.49	259.05	44.56	Legal	Legal	Legal	Legal	Legal
11197	2013-12-31	2013-01-03	2	F	422215	81567105		SIPSIS	PAED18C	A14.9	202.28	2.55	204.83	353.19	148.36	Legal	Legal	Legal	Legal	Legal
11216	2013-01-18	2013-01-28	1DY	F	425048	64191292		SEVERE HYPOXIC	PAED18C	693.4	210.86	6.6	217.46	353.19	135.73	Legal	Legal	Legal	Legal	Legal
11123	2013-01-20	2013-01-22	7	F	282456	64195262		SEIZURE DISORDERS	PAED20C	R56.8	104.52	14.72	119.24	184.59	65.35	Legal	Fraudulent	Fraudulent	Fraudulent	Fraudulent
11125	2013-01-29	2013-01-31	1	M	419018	74843003		FEBRILE CONVULSION	PAED20C	R56.8	104.52	62.5	167.02	184.59	17.57	Legal	Fraudulent	Fraudulent	Fraudulent	Fraudulent
11141	2013-01-12	2013-01-14	5	M	287349	63701101		SEIZURE DISORDER	PAED20C	R56.8	104.52	8.3	112.82	184.59	71.77	Legal	Fraudulent	Fraudulent	Fraudulent	Fraudulent
11169	2013-01-08	2013-01-14	5	M	423351	67376084		FESRIH CONVULSION	PAED20C	R556.8	104.52	17.9	122.42	184.59	62.17	Legal	Fraudulent	Fraudulent	Fraudulent	Fraudulent
11109	2013-01-03	2013-01-06	4	M	231189	58069693		SICKLE CELL DISEASE	PAED24C	D57.1	170.43	13.72	184.15	233.58	49.43	Legal	Fraudulent	Fraudulent	Fraudulent	Fraudulent
11126	2013-01-22	2013-01-27	5	F	379672	56638213		VASO-OCCLUSIVE CRISIS	PAED24C	D57.1	170.43	42.96	213.39	233.58	20.19	Legal	Fraudulent	Fraudulent	Fraudulent	Fraudulent
11131	2013-01-15	2013-01-17	12	F	40553	16432710		SICKLE CELL DISEASE	PAED24C	D57.1	170.43	26.89	197.32	233.58	36.26	Legal	Fraudulent	Fraudulent	Fraudulent	Fraudulent
11134	2012-12-25	2013-01-01	10	F	32239	16446143		SICKLE CELL DISEASE	PAED24C	D57.1	170.43	53.03	223.46	233.58	10.12	Legal	Fraudulent	Fraudulent	Fraudulent	Fraudulent
11135	2012-12-31	2013-01-03	9	M	416784	79348170		SICKLE CELL DISEASE	PAED24C	D57.1	170.43	30.77	201.2	233.58	32.38	Legal	Fraudulent	Fraudulent	Fraudulent	Fraudulent
11158	2012-12-05	2013-01-09	11	M	382786	66731078		SICKLE CELL DISEASE	PAED24C	D57.1	170.43	16.48	186.91	233.58	46.67	Legal	Fraudulent	Fraudulent	Fraudulent	Fraudulent
11159	29-21-2012	2013-01-02	6	M	396425	75347449		SICKLE CELL DISEASE	PAED24C	D57.1	170.43	93.72	264.15	233.58	-30.57	Fradulent	Legal	Fraudulent	Fraudulent	Fraudulent
11170	2013-01-09	2013-01-11	11	F	423415	65281384		SICKLE CELL DISEASE	PAED24C	D57.1	170.43	22.86	193.29	233.58	40.29	Legal	Legal	Legal	Legal	Legal
11171	2013-01-17	2013-01-20	1	F	424720	83650464		SICKLE CELL DISEASE	PAED24C	D57.1	170.43	45.01	215.44	233.58	18.14	Legal	Legal	Legal	Legal	Legal
11110	2012-12-31	2013-01-03	1	F	422203	67125805		NEONATAL SEPSIS	PAEDI4C	A41.9	202.28	2.55	204.83	259.05	54.22	Legal	Legal	Legal	Legal	Legal
11111	2012-12-30	2013-01-03	2	F	422058	81818863		NEONATAL SEPSIS	PAEDI4C	A41.9	202.28	3.55	205.83	259.05	53.22	Legal	Legal	Legal	Legal	Legal
11112	2012-12-31	2013-01-03	1	F	422233	82759285		NEONATAL SEPSIS	PAEDI4C	A41.9	202.28	2.55	204.83	259.05	54.22	Legal	Legal	Legal	Legal	Legal
11114	2012-12-29	2013-01-03	5	F	422395	81457030		NEONATAL SEPSIS	PAEDI4C	A41.9	202.28	2.55	204.83	259.05	54.22	Legal	Legal	Legal	Legal	Legal
11122	2013-01-03	2013-01-10	DD	F	421487	81530441		NEONATAL SEPSIS	PAEDI4C	A41.9	202.28	4.98	207.26	259.05	51.79	Legal	Legal	Legal	Legal	Legal
11101	2012-12-13	2013-01-06	2	F	284228	88824803		SEVERE ACUTE MALNUTRITION	PAEDO5C	E43	98.93	12.94	111.87	242.75	130.88	Legal	Legal	Legal	Legal	Legal
11100	2012-12-30	2013-01-05	8	M	422059	81726046		ANAEMIA	PAEDO6C	D51.9	155.48	26.96	182.44	222.21	39.77	Legal	Fraudulent	Fraudulent	Fraudulent	Fraudulent
11124	2013-01-12	2013-01-18	4	F	119243	16853970		BURNS	PSUR27C	T30.0	644.15	61.57	705.72	883.42	177.7	Legal	Legal	Legal	Legal	Legal
7606	1-13-2013	1-13-2013	2	F	424063	84392113			ZOOM02C		11.48	2.33	13.81	16.03	2.22	Legal	Legal	Legal	Legal	Legal
7607	1-15-2013	1-15-2013	2	F	303027	82310829			ZOOM02C		7.6	5.69	13.29	16.03	2.74	Legal	Legal	Legal	Legal	Legal
7608	2013-10-01	2013-10-01	1	F	423561	81556665			ZOOM02C		11.48	16.23	27.71	16.03	-11.68	Fradulent	Legal	Fraudulent	Fraudulent	Fraudulent
7933	1-24-2013	1-24-2013	6	M	320568	60207068			ZOOM02C		7.6	17.98	25.58	16.03	-9.55	Fradulent	Legal	Fraudulent	Fraudulent	Fraudulent
8340	1-25-2013	1-25-2013	9	M	408372	87745792			ZOOM02C		7.6	14.4	22	16.03	-5.97	Fradulent	Legal	Fraudulent	Fraudulent	Fraudulent
8415	1-21-2013	1-21-2013	10	F	221041	16485517			ZOOM02C		7.6	4	11.6	16.03	4.43	Legal	Legal	Legal	Legal	Legal
5665	2013-11-01	2013-11-01	80	F	358726	53377406			ZOOMO2A		13.03		13.03	18.15	5.12	Legal	Legal	Legal	Legal	Legal
5666	2013-01-01	2013-01-01	46	M	422260	66383837			ZOOMO2A		8.66	22.3	30.96	18.15	-12.81	Fradulent	Legal	Fraudulent	Fraudulent	Fraudulent
5667	2013-01-01	2013-01-01	70	M	421590	86752903			ZOOMO2A		8.66	79.82	88.48	18.15	-70.33	Fradulent	Legal	Fraudulent	Fraudulent	Fraudulent
5718	2013-07-01	2013-07-01	35	F	416192	82057154			ZOOMO2A		8.66	0.18	8.84	18.15	9.31	Legal	Legal	Legal	Legal	Legal
5722	2013-07-01	2013-07-01	80	F	423066	16418410			ZOOMO2A		8.66		8.66	18.15	9.49	Legal	Legal	Legal	Legal	Legal
5735	2013-06-01	2013-06-01	42	M	423057	75939480			ZOOMO2A		8.66		8.66	18.15	9.49	Legal	Legal	Legal	Legal	Legal
5897	1-22-2013	1-22-2013	17	M	425458	52923500			ZOOMO2A		8.66	9.3	17.96	18.15	0.19	Legal	Legal	Legal	Legal	Legal
5898	1-22-2013	1-22-2013	23	F	425509	65571904			ZOOMO2A		8.66	26.64	35.3	18.15	-17.15	Fradulent	Legal	Fraudulent	Fraudulent	Fraudulent
5899	1-21-2013	1-21-2013	12	M	425411	69630578			ZOOMO2A		8.66	1.7	10.36	18.15	7.79	Legal	Legal	Legal	Legal	Legal
5934	1-20-2013	1-20-2013	47	F	357797	66664624			ZOOMO2A		8.66		8.66	18.15	9.49	Legal	Legal	Legal	Legal	Legal
5977	1-20-2013	1-20-2013	42	F	425223	16488906			ZOOMO2A		8.66	5.9	14.56	18.15	3.59	Legal	Legal	Legal	Legal	Legal
5978	1-20-2013	1-20-2013	21	F	425194	83473293			ZOOMO2A		8.66	17.8	26.46	18.15	-8.31	Fradulent	Legal	Fraudulent	Fraudulent	Fraudulent
5979	1-20-2013	1-20-2013	19	F	425246	68478760			ZOOMO2A		8.66	4.56	13.22	18.15	4.93	Legal	Legal	Legal	Legal	Legal
11161	2013-01-04	2013-01-07	6	F	422997	73282486		SEVERE MALARIA	PAED37C	B50.9	106.21	10.79	117	250.02	133.02	Legal	Fraudulent	Fraudulent	Fraudulent	Fraudulent
11162	2013-01-05	2013-01-07	3	M	402110	89644684		MALARIA COMPLICATED	PAED37C	B50.9	106.21	5.5	111.71	250.02	138.31	Legal	Fraudulent	Fraudulent	Fraudulent	Fraudulent
11164	2013-01-12	2013-01-14	8	F	423960	89327646		MALARIA COMPLICATED	PAED37C	B50.9	106.21	6.4	112.61	250.02	137.41	Legal	Fraudulent	Fraudulent	Fraudulent	Fraudulent
11168	2013-01-12	2013-01-14	10	F	423952	66612572		SEVERE MALARIA	PAED37C	B50.9	106.21	33.31	139.52	250.02	110.5	Legal	Fraudulent	Fraudulent	Fraudulent	Fraudulent
11180	2013-01-23	2013-01-25	10	F	271124	52923419		MALARIA COMPLICATED	PAED37C	B50.9	106.21	9.78	115.99	250.02	134.03	Legal	Fraudulent	Fraudulent	Fraudulent	Fraudulent
11184	2013-01-17	2013-01-27	8	M	422059	81726046		SEVERE MALARIA	PAED37C	B50.9	106.21	42.37	148.58	250.02	101.44	Legal	Fraudulent	Fraudulent	Fraudulent	Fraudulent
11185	2013-01-23	2013-01-27	2	M	290462	63316237		SEVERE MALARIA	PAED37C	B50.9	106.21	17.23	123.44	250.02	126.58	Legal	Fraudulent	Fraudulent	Fraudulent	Fraudulent
11186	2013-01-25	2013-01-27	1	M	425943	85211588		BRONCHOPNEUMONIA	PAED37C	J18.9	130	7	137	250.02	113.02	Legal	Fraudulent	Fraudulent	Fraudulent	Fraudulent
11187	2013-01-01	2013-01-03	1	F	422533	83263638		LATE PRETERM	PAED37C		197.34	0.06	197.4	250.02	52.62	Legal	Fraudulent	Fraudulent	Fraudulent	Fraudulent
11262	2012-11-25	2012-11-29	1	M	416954	78745332		MALARIA	PAED37C	B50.9	137.67	27.91	165.58	250.02	84.44	Legal	Fraudulent	Fraudulent	Fraudulent	Fraudulent
11108	2013-01-01	2013-01-04	4	M	422339	66621348		PNEUMONIA	PAED38C	M8.9	130	26.5	156.5	252.47	95.97	Legal	Fraudulent	Fraudulent	Fraudulent	Fraudulent
11156	2012-12-29	2013-01-01	1	M	411307	87299954		MALARIA	PAED38C		130	7	137	252.47	115.47	Legal	Fraudulent	Fraudulent	Fraudulent	Fraudulent
11163	2013-01-08	2013-01-11	7	M	370625	16412245		MALARIA COMPLICATED	PAED38C	A41.9	130	39.47	169.47	252.47	83	Legal	Fraudulent	Fraudulent	Fraudulent	Fraudulent
11166	2013-01-07	2013-01-14	1	M	423244	74124807		MENINGITIS	PAED38C	G03.9	130	33.15	163.15	252.47	89.32	Legal	Fraudulent	Fraudulent	Fraudulent	Fraudulent
11172	2013-01-08	2013-01-11	3	M	423364	81923783		ACUTE INFECTION ENDOAR	PAED38C	I33.0	130	48.4	178.4	252.47	74.07	Legal	Fraudulent	Fraudulent	Fraudulent	Fraudulent
221	2013-01-09	2013-01-09	28	F	421891	52846454			OPDC02A	80.9	13.27	0.72	13.99	22.13	8.14	Legal	Legal	Legal	Legal	Legal
222	2013-01-09	2013-01-09	30	F	412309	62129981			OPDC02A	80.9	13.27	0.72	13.99	22.13	8.14	Legal	Legal	Legal	Legal	Legal
223	2013-01-09	2013-01-09	36	F	408308	66910008			OPDC02A	80.9	13.27	0.72	13.99	22.13	8.14	Legal	Legal	Legal	Legal	Legal
224	2013-01-09	2013-01-09	29	F	357786	73229037			OPDC02A	80.9	13.27	0.36	13.63	22.13	8.5	Legal	Legal	Legal	Legal	Legal
225	2013-01-09	2013-01-09	26	F	407023	85944720			OPDC02A	80.9	13.27	0.72	13.99	22.13	8.14	Legal	Legal	Legal	Legal	Legal
226	2013-01-09	2013-01-09	34	F	417561	88871760			OPDC02A	80.9	13.27	0.66	13.93	22.13	8.2	Legal	Legal	Legal	Legal	Legal
227	2013-01-09	2013-01-09	32	F	146517	16371214			OPDC02A	80.9	13.27	0.86	14.13	22.13	8	Legal	Legal	Legal	Legal	Legal
228	2013-01-09	2013-01-09	24	F	418707	87910017			OPDC02A	80.9	13.27	0.36	13.63	22.13	8.5	Legal	Legal	Legal	Legal	Legal
229	2013-01-09	2013-01-09	25	F	408222	86639219			OPDC02A	80.9	13.27	0.72	13.99	22.13	8.14	Legal	Legal	Legal	Legal	Legal
230	2013-01-09	2013-01-09	33	F	420925	83208939			OPDC02A	80.9	13.27	0.12	13.39	22.13	8.74	Legal	Legal	Legal	Legal	Legal
231	2013-01-09	2013-01-09	28	F	213631	49454346			OPDC02A	80.9	13.27	0.72	13.99	22.13	8.14	Legal	Fraudulent	Fraudulent	Fraudulent	Fraudulent
232	2013-01-09	2013-01-09	25	F	404807	28519462			OPDC02A	80.9	13.27	0.72	13.99	22.13	8.14	Legal	Legal	Legal	Legal	Legal
233	2013-01-09	2013-01-09	31	F	370379	81884053			OPDC02A	80.9	13.27	0.72	13.99	22.13	8.14	Legal	Legal	Legal	Legal	Legal
234	2013-01-09	2013-01-09	31	F	421895	36996542			OPDC02A	80.9	13.27	0.06	13.33	22.13	8.8	Legal	Legal	Legal	Legal	Legal
235	2013-01-09	2013-01-09	34	F	401370	89337720			OPDC02A	80.9	13.27	0.72	13.99	22.13	8.14	Legal	Legal	Legal	Legal	Legal
236	2013-01-09	2013-01-09	32	F	260082	16470534			OPDC02A	80.9	13.27	0.72	13.99	22.13	8.14	Legal	Legal	Legal	Legal	Legal
237	2013-01-09	2013-01-09	31	F	393036	80431689			OPDC02A	80.9	13.27	1.7	14.97	22.13	7.16	Legal	Legal	Legal	Legal	Legal
238	2013-01-09	2013-01-09	30	F	415819	88695834			OPDC02A	80.9	13.27	33.6	46.87	22.13	-24.74	Fradulent	Legal	Fraudulent	Fraudulent	Fraudulent
239	2013-01-09	2013-01-09	37	F	266897	44173886			OPDC02A	80.9	13.27	13.86	27.13	22.13	-5	Fradulent	Legal	Fraudulent	Fraudulent	Fraudulent
240	2013-01-09	2013-01-09	38	F	406804	58810071			OPDC02A	80.9	13.27	34.32	47.59	22.13	-25.46	Fradulent	Legal	Fraudulent	Fraudulent	Fraudulent
241	2013-01-09	2013-01-09	32	F	211871	0 012702			OPDC02A	80.9	13.27	0.26	13.53	22.13	8.6	Legal	Legal	Legal	Legal	Legal
242	2013-01-09	2013-01-09	29	F	394111	18130651			OPDC02A	80.9	13.27	0.92	14.19	22.13	7.94	Legal	Legal	Legal	Legal	Legal
243	2013-01-09	2013-01-09	27	F	407719	87466827			OPDC02A	80.9	13.27	0.72	13.99	22.13	8.14	Legal	Legal	Legal	Legal	Legal
244	2013-01-09	2013-01-09	32	F	158885	89608978			OPDC02A	80.9	13.27	0.72	13.99	22.13	8.14	Legal	Legal	Legal	Legal	Legal
245	2013-01-09	2013-01-09	34	F	422860	62725628			OPDC02A	80.9	13.27	0.72	13.99	22.13	8.14	Legal	Legal	Legal	Legal	Legal
246	2013-01-09	2013-01-09	28	F	415812	59798966			OPDC02A	80.9	13.27	0.66	13.93	22.13	8.2	Legal	Legal	Legal	Legal	Legal
6013	1-15-2013	1-15-2013	18	M	424404	79479949			ZOOMO2A		8.66	7.8	16.46	18.15	1.69	Legal	Legal	Legal	Legal	Legal
6016	1-19-2013	1-19-2013	81	M	301207	60869024			ZOOMO2A		8.66	39.2	47.86	18.15	-29.71	Fradulent	Legal	Fraudulent	Fraudulent	Fraudulent
6063	1-22-2013	1-22-2013	28	M	417673	72419594			ZOOMO2A		13.03	16.9	29.93	18.15	-11.78	Fradulent	Legal	Fraudulent	Fraudulent	Fraudulent
6106	1-29-2013	1-29-2013	55	F	426208	74256639			ZOOMO2A		8.66	22.8	31.46	18.15	-13.31	Fradulent	Legal	Fraudulent	Fraudulent	Fraudulent
6107	1-28-2013	1-28-2013	66	F	426358	45162086			ZOOMO2A		8.66	11.6	20.26	18.15	-2.11	Fradulent	Legal	Fraudulent	Fraudulent	Fraudulent
5671	2013-02-01	2013-02-01	2	F	422285	16465609			ZOOMO2C		7.6	11.75	19.35	16.03	-3.32	Fradulent	Legal	Fraudulent	Fraudulent	Fraudulent
5900	1-22-2013	1-22-2013	7	M	425434	61199776			ZOOMO2C		7.6	36.91	44.51	16.03	-28.48	Fradulent	Legal	Fraudulent	Fraudulent	Fraudulent
5992	1-19-2013	1-19-2013	2	F	424984	83001893			ZOOMO2C		7.6	13	20.6	16.03	-4.57	Fradulent	Legal	Fraudulent	Fraudulent	Fraudulent
5995	1-19-2013	1-19-2013	9	M	425146	78315747			ZOOMO2C		7.6	9.6	17.2	16.03	-1.17	Fradulent	Legal	Fraudulent	Fraudulent	Fraudulent
6004	1-18-2013	1-18-2013	1	F	424689	82361224			ZOOMO2C		11.48	9.94	21.42	16.03	-5.39	Fradulent	Legal	Fraudulent	Fraudulent	Fraudulent
6005	1-19-2013	1-19-2013	9	M	267199	16462157			ZOOMO2C		7.6	7.8	15.4	16.03	0.63	Legal	Legal	Legal	Legal	Legal
11133	2013-01-02	2013-01-04	8	F	215146	16420437		ACUTE ASTHMATIC ALTUELE	PAED30C	I45.9	68.9	16.24	85.14	120.53	35.39	Legal	Legal	Legal	Legal	Legal
11165	2013-01-12	2013-01-14	1	M	410816	78896228		VIRAL GASTROENTERITIS	PAED31C	A0.9	96.98	10.31	107.29	126.78	19.49	Legal	Legal	Legal	Legal	Legal
11189	2013-01-13	2013-01-15	3	F	424061	64336360		GASTROEUTETY	PAED31C	A09	96.98	2.33	99.31	126.78	27.47	Legal	Legal	Legal	Legal	Legal
11155	2012-12-31	2013-01-02	2	M	347226	65456193		MALARIA	PAED36C	B54	32.24	12.7	44.94	82.07	37.13	Legal	Legal	Legal	Legal	Legal
11173	2013-01-17	2013-01-19	2	M	424916	85435103		MALARIA	PAED36C	B64	32.24	21	53.24	82.07	28.83	Legal	Legal	Legal	Legal	Legal
11161	2013-01-04	2013-01-07	6	F	422997	73282486		SEVERE MALARIA	PAED37C	B50.9	106.21	10.79	117	250.02	133.02	Legal	Fraudulent	Fraudulent	Fraudulent	Fraudulent
11162	2013-01-05	2013-01-07	3	M	402110	89644684		MALARIA COMPLICATED	PAED37C	B50.9	106.21	5.5	111.71	250.02	138.31	Legal	Fraudulent	Fraudulent	Fraudulent	Fraudulent
11164	2013-01-12	2013-01-14	8	F	423960	89327646		MALARIA COMPLICATED	PAED37C	B50.9	106.21	6.4	112.61	250.02	137.41	Legal	Fraudulent	Fraudulent	Fraudulent	Fraudulent
11168	2013-01-12	2013-01-14	10	F	423952	66612572		SEVERE MALARIA	PAED37C	B50.9	106.21	33.31	139.52	250.02	110.5	Legal	Fraudulent	Fraudulent	Fraudulent	Fraudulent
11180	2013-01-23	2013-01-25	10	F	271124	52923419		MALARIA COMPLICATED	PAED37C	B50.9	106.21	9.78	115.99	250.02	134.03	Legal	Fraudulent	Fraudulent	Fraudulent	Fraudulent
11184	2013-01-17	2013-01-27	8	M	422059	81726046		SEVERE MALARIA	PAED37C	B50.9	106.21	42.37	148.58	250.02	101.44	Legal	Fraudulent	Fraudulent	Fraudulent	Fraudulent
11185	2013-01-23	2013-01-27	2	M	290462	63316237		SEVERE MALARIA	PAED37C	B50.9	106.21	17.23	123.44	250.02	126.58	Legal	Fraudulent	Fraudulent	Fraudulent	Fraudulent
11186	2013-01-25	2013-01-27	1	M	425943	85211588		BRONCHOPNEUMONIA	PAED37C	J18.9	130	7	137	250.02	113.02	Legal	Fraudulent	Fraudulent	Fraudulent	Fraudulent
11187	2013-01-01	2013-01-03	1	F	422533	83263638		LATE PRETERM	PAED37C		197.34	0.06	197.4	250.02	52.62	Legal	Fraudulent	Fraudulent	Fraudulent	Fraudulent
11262	2012-11-25	2012-11-29	1	M	416954	78745332		MALARIA	PAED37C	B50.9	137.67	27.91	165.58	250.02	84.44	Legal	Fraudulent	Fraudulent	Fraudulent	Fraudulent
11108	2013-01-01	2013-01-04	4	M	422339	66621348		PNEUMONIA	PAED38C	M8.9	130	26.5	156.5	252.47	95.97	Legal	Fraudulent	Fraudulent	Fraudulent	Fraudulent
11156	2012-12-29	2013-01-01	1	M	411307	87299954		MALARIA	PAED38C		130	7	137	252.47	115.47	Legal	Fraudulent	Fraudulent	Fraudulent	Fraudulent
11163	2013-01-08	2013-01-11	7	M	370625	16412245		MALARIA COMPLICATED	PAED38C	A41.9	130	39.47	169.47	252.47	83	Legal	Fraudulent	Fraudulent	Fraudulent	Fraudulent
11166	2013-01-07	2013-01-14	1	M	423244	74124807		MENINGITIS	PAED38C	G03.9	130	33.15	163.15	252.47	89.32	Legal	Fraudulent	Fraudulent	Fraudulent	Fraudulent
11172	2013-01-08	2013-01-11	3	M	423364	81923783		ACUTE INFECTION ENDOAR	PAED38C	I33.0	130	48.4	178.4	252.47	74.07	Legal	Fraudulent	Fraudulent	Fraudulent	Fraudulent
11175	2013-01-08	2013-01-20	11	F	422801	89084073		BRONCHOPNEUMONIA	PAED38C	J18.9	130	38.8	168.8	252.47	83.67	Legal	Legal	Legal	Legal	Legal
11176	2013-01-09	2013-01-13	7	M	423532	84001315		SEPSIS	PAED38C	A41.9	130	26.26	156.26	252.47	96.21	Legal	Legal	Legal	Legal	Legal
11193	2013-01-03	2013-01-07	1	F	422543	89597618		BRONCHOPNEUMONIA	PAED38C	J18.9	197.6	4.86	202.46	252.47	50.01	Legal	Legal	Legal	Legal	Legal
11208	2013-01-14	2013-01-19	2	F	422054	57109267		BRONCHOPNEUMONIA	PAED38C	J18.9	197.6	8.9	206.5	252.47	45.97	Legal	Legal	Legal	Legal	Legal
11123	2013-01-20	2013-01-22	7	F	282456	64195262		SEIZURE DISORDERS	PAED20C	R56.8	104.52	14.72	119.24	184.59	65.35	Legal	Fraudulent	Fraudulent	Fraudulent	Fraudulent
11125	2013-01-29	2013-01-31	1	M	419018	74843003		FEBRILE CONVULSION	PAED20C	R56.8	104.52	62.5	167.02	184.59	17.57	Legal	Fraudulent	Fraudulent	Fraudulent	Fraudulent
11141	2013-01-12	2013-01-14	5	M	287349	63701101		SEIZURE DISORDER	PAED20C	R56.8	104.52	8.3	112.82	184.59	71.77	Legal	Fraudulent	Fraudulent	Fraudulent	Fraudulent
11169	2013-01-08	2013-01-14	5	M	423351	67376084		FESRIH CONVULSION	PAED20C	R556.8	104.52	17.9	122.42	184.59	62.17	Legal	Fraudulent	Fraudulent	Fraudulent	Fraudulent
11109	2013-01-03	2013-01-06	4	M	231189	58069693		SICKLE CELL DISEASE	PAED24C	D57.1	170.43	13.72	184.15	233.58	49.43	Legal	Fraudulent	Fraudulent	Fraudulent	Fraudulent
11126	2013-01-22	2013-01-27	5	F	379672	56638213		VASO-OCCLUSIVE CRISIS	PAED24C	D57.1	170.43	42.96	213.39	233.58	20.19	Legal	Fraudulent	Fraudulent	Fraudulent	Fraudulent
11131	2013-01-15	2013-01-17	12	F	40553	16432710		SICKLE CELL DISEASE	PAED24C	D57.1	170.43	26.89	197.32	233.58	36.26	Legal	Fraudulent	Fraudulent	Fraudulent	Fraudulent
11134	2012-12-25	2013-01-01	10	F	32239	16446143		SICKLE CELL DISEASE	PAED24C	D57.1	170.43	53.03	223.46	233.58	10.12	Legal	Fraudulent	Fraudulent	Fraudulent	Fraudulent
11135	2012-12-31	2013-01-03	9	M	416784	79348170		SICKLE CELL DISEASE	PAED24C	D57.1	170.43	30.77	201.2	233.58	32.38	Legal	Fraudulent	Fraudulent	Fraudulent	Fraudulent
11158	2012-12-05	2013-01-09	11	M	382786	66731078		SICKLE CELL DISEASE	PAED24C	D57.1	170.43	16.48	186.91	233.58	46.67	Legal	Fraudulent	Fraudulent	Fraudulent	Fraudulent
11127	2013-01-22	2013-01-25	5	M	425519	87283706		SKIN DISEASE	PAED26C	I23.9	171.6	16.3	187.9	399.29	211.39	Legal	Legal	Legal	Legal	Legal

## Sheet: Sheet2
G-DRG	Age	SEX	Tariff (GH¢)
ASUR01A	1	2	499.19
ASUR02A	1	2	962.49
ASUR03A	1	2	283.35
ASUR04A	1	2	843.55
ASUR05A	1	2	304.26
ASUR06A	1	2	712.91
ASUR07A	1	2	511.17
ASUR08A	1	2	481.5
ASUR09A	1	2	193.23
ASUR10A	1	2	474.12
ASUR11A	1	2	855
ASUR12A	1	2	738.2
ASUR13A	1	2	935.37
ASUR14A	1	2	269.22
ASUR15A	1	2	337.11
ASUR16A	1	2	524.7
ASUR17A	1	2	706.5
ASUR18A	1	2	861.29
ASUR19A	1	2	428.21
ASUR20A	1	2	238.86
ASUR21A	1	2	611.69
ASUR22A	1	2	209.62
ASUR23A	1	2	484.45
ASUR24A	1	2	780.24
ASUR25A	1	2	353.34
ASUR27A	1	2	150.77
ASUR28A	1	2	535.43
ASUR29A	1	2	904.17
ASUR30A	1	2	151.19
ASUR31A	1	2	224.87
ASUR32A	1	2	404.38
ASUR33A	1	2	669.8
ASUR34A	1	2	208.69
ASUR35A	1	2	215.46
ASUR36A	1	2	329.07
ASUR37A	1	2	465.96
DENT01A	1	2	26.97
DENT01C	0	2	24.98
DENT02A	1	2	52.75
DENT03A	1	2	29.64
DENT03C	0	2	28.31
DENT04A	1	2	38.98
DENT04C	0	2	39.3
DENT05A	1	2	40.6
DENT05C	0	2	35.27
DENT06A	1	2	15.48
DENT06C	0	2	11.67
DENT07A	1	2	36.66
DENT07C	0	2	35.4
DENT08A	1	2	62.19
DENT08C	0	2	57.52
DENT09A	1	2	159.3
DENT09C	0	2	129.54
DENT10A	1	2	28.86
DENT10C	0	2	26.3
DENT11A	1	2	52.07
DENT11C	0	2	48.14
DENT12A	1	2	209.39
DENT12C	0	2	187.02
DENT13A	1	2	134.76
DENT13C	0	2	106.12
DENT14A	1	2	447.82
DENT14C	0	2	392.47
DENT15A	1	2	61.95
DENT15C	0	2	49.37
DENT16A	1	2	31.91
DENT16C	0	2	27.88
DENT17A	1	2	20.08
DENT17C	0	2	18.53
DENT18A	1	2	383.67
DENT18C	0	2	336.75
DENT19A	1	2	458.62
DENT19C	0	2	363.14
DENT20A	1	2	272.5
DENT20C	0	2	203.01
DENT21A	1	2	414.77
DENT21C	0	2	350.43
DENT22A	1	2	102.78
DENT22C	0	2	75.41
DENT23A	1	2	15.05
DENT23C	0	2	15.22
DENT24A	1	2	12
DENT24C	0	2	11.78
MEDI01A	1	2	214.32
MEDI02A	0	2	173.7
MEDI03A	1	2	336.88
MEDI04A	0	2	180.93
MEDI05A	1	2	212.64
MEDI06A	0	2	190.83
MEDI07A	1	2	247.68
MEDI08A	0	2	117.88
MEDI10A	1	2	359.9
MEDI11A	0	2	284.27
MEDI12A	1	2	172.89
MEDI13A	0	2	155.36
MEDI14A	1	2	231.42
MEDI15A	0	2	344.82
MEDI16A	1	2	179.85
MEDI17A	0	2	249.55
MEDI18A	1	2	388.6
MEDI19A	0	2	247.4
MEDI20A	1	2	306.15
MEDI21A	0	2	1046.85
MEDI22A	1	2	126.81
MEDI23A	0	2	116.29
MEDI24A	1	2	200.85
MEDI25A	0	2	226.99
MEDI26A	1	2	79.38
MEDI27A	0	2	285.51
MEDI28A	1	2	63.59
MEDI29A	0	2	215.62
MEDI30A	1	2	331.94
MEDI31A	0	2	159.74
MEDI32A	1	2	166.73
MEDI33A	0	2	197.8
MEDI34A	1	2	227.14
MEDI35A	0	2	353.6
MEDI36A	1	2	172.19
MEDI37A	0	2	50.93
MEDI38A	1	2	207.53
MEDI39A	0	2	33.08
MEDI40A	1	2	32.37
MEDI41A	0	2	215.62
OPDC02A	1	2	22.13
OPDC03A	1	2	11.6
OPDC03C	0	2	11.6
OPDC04A	1	2	11.9
OPDC04C	0	2	10.68
OPDC05A	1	2	11.39
OPDC05C	0	2	11.39
OPDC06A	1	2	12.85
OPDC06C	0	2	11.93
OPDC11A	1	2	6.17
OPDC11C	0	2	6.17
OPDC13A	1	2	12.33
OPDC13C	0	2	12.33
ORTH01A	1	2	53.83
ORTH01C	0	2	50.57
ORTH02A	1	2	228.5
ORTH02C	0	2	211.47
ORTH03A	1	2	502.48
ORTH03C	0	2	442.36
ORTH04A	1	2	360.95
ORTH04C	0	2	328.74
ORTH05A	1	2	245.3
ORTH05C	0	2	211.22
ORTH06A	1	2	31.65
ORTH06C	0	2	28.29
ORTH07A	1	2	150.28
ORTH07C	0	2	135.08
ORTH08A	1	2	489.92
ORTH08C	0	2	448.5
ORTH09A	1	2	437.7
ORTH09C	0	2	387.36
ORTH10A	1	2	906.85
ORTH10C	0	2	749.14
ORTH11A	1	2	172.88
ORTH11C	0	2	145.82
ORTH12A	1	2	541.14
ORTH12C	0	2	454.16
ORTH14A	1	2	642.27
ORTH14C	0	2	552.26
ORTH15A	1	2	128.94
ORTH15C	0	2	118.8
ORTH16A	1	2	65.42
ORTH16C	0	2	52.53
ORTH17A	1	2	641.79
ORTH17C	0	2	565.03
ORTH18A	1	2	836
ORTH18C	0	2	693.06
ORTH19A	1	2	387.02
ORTH19C	0	2	371.37
ORTH20A	1	2	482.09
ORTH20C	0	2	441.25
ORTH22A	1	2	381.23
ORTH22C	0	2	346.93
ORTH23A	1	2	335.72
ORTH23C	0	2	306.02
ORTH24A	1	2	183.04
ORTH24C	0	2	229.44
ORTH25A	1	2	215.46
ORTH25C	0	2	220.43
ORTH26A	1	2	329.07
ORTH26C	0	2	350.03
ORTH27A	1	2	465.96
ORTH27C	0	2	478.83
PAED01C	0	2	188.78
PAED02C	0	2	172.09
PAED03C	0	2	342.64
PAED04C	0	2	180.35
PAED05C	0	2	242.75
PAED06C	0	2	222.21
PAED07C	0	2	134.26
PAED08C	0	2	280.98
PAED09C	0	2	154.33
PAED10C	0	2	299
PAED11C	0	2	142.37
PAED12C	0	2	196.67
PAED13C	0	2	437.49
PAED14C	0	2	259.05
PAED15C	0	2	277.3
PAED16C	0	2	217.91
PAED18C	0	2	353.19
PAED19C	0	2	337.29
PAED20C	0	2	184.59
PAED21C	0	2	124.72
PAED22C	0	2	224.17
PAED23C	0	2	331.86
PAED24C	0	2	233.58
PAED25C	0	2	272.68
PAED26C	0	2	399.29
PAED27C	0	2	212.22
PAED28C	0	2	258.02
PAED29C	0	2	725.2
PAED30C	0	2	120.53
PAED31C	0	2	126.78
PAED32C	0	2	171.59
PAED33C	0	2	243.64
PAED34C	0	2	73.99
PAED35C	0	2	270.34
PAED36C	0	2	82.07
PAED37C	0	2	250.02
PAED38C	0	2	252.47
PAED39C	0	2	102.75
PAED40C	0	2	170.53
PAED41C	0	2	219.07
PAED42C	0	2	262.18
PAED43C	0	2	359.31
PAED44C	0	2	52.72
PAED45C	0	2	291.57
PAED46C	0	2	250.02
ZOOM01A	1	2	79.39
ZOOM01C	0	2	69.89
ZOOM02A	1	2	18.15
ZOOM02C	0	2	16.03
ZOOM03A	1	2	56.69
ZOOM03C	0	2	48.7
ZOOM04A	1	2	7.1
ZOOM04C	0	2	7.1
ZOOM05A	1	2	12.66
ZOOM05C	0	2	12.66
PSUR01C	0	2	498.99
PSUR02C	0	2	536.05
PSUR03C	0	2	589.98
PSUR04C	0	2	430.07
PSUR05C	0	2	199.14
PSUR06C	0	2	265.07
PSUR07C	0	2	180.09
PSUR08C	0	2	440.19
PSUR09C	0	2	413.57
PSUR10C	0	2	461.16
PSUR11C	0	2	457.56
PSUR12C	0	2	425.44
PSUR13C	0	2	131.03
PSUR14C	0	2	582.14
PSUR15C	0	2	472.47
PSUR16C	0	2	801.37
PSUR17C	0	2	328.76
PSUR18C	0	2	499.53
PSUR19C	0	2	546.17
PSUR20C	0	2	1441.9
PSUR21C	0	2	169.45
PSUR22C	0	2	62.29
PSUR23C	0	2	568.98
PSUR24C	0	2	559.18
PSUR25C	0	2	497.31
PSUR26C	0	2	329.07
PSUR27C	0	2	883.42
PSUR28C	0	2	892.52
PSUR29C	0	2	304.62
PSUR30C	0	2	516.18
PSUR31C	0	2	522.65
PSUR32C	0	2	902.85
PSUR33C	0	2	156.81
PSUR34C	0	2	181.44
PSUR35C	0	2	686.06
PSUR36C	0	2	220.22
PSUR37C	0	2	220.43
PSUR38C	0	2	350.03
PSUR39C	0	2	478.83
OBGY01A	4	3	363.2
OBGY02A	4	3	204.32
OBGY03A	4	3	255.22
OBGY04A	4	3	115.55
OBGY05A	4	3	118.16
OBGY06A	4	3	101.46
OBGY07A	4	3	158.3
OBGY08A	4	3	120.47
OBGY09A	4	3	78.8
OBGY10A	4	3	155.55
OBGY11A	4	3	157.38
OBGY12A	4	3	116.45
OBGY13A	4	3	297.98
OBGY14A	4	3	370.68
OBGY15A	4	3	297.38
OBGY16A	4	3	9.73
OBGY17A	4	3	281.04
OBGY18A	4	3	388.11
OBGY19A	4	3	479.23
OBGY20A	4	3	353.8
OBGY21A	4	3	312.39
OBGY22A	4	3	446.69
OBGY23A	4	3	97.47
OBGY24A	4	3	379.22
OBGY25A	4	3	182.55
OBGY26A	4	3	153.47
OBGY27A	4	3	263.31
OBGY28A	4	3	367.17
OBGY29A	4	3	120.53
OBGY30A	4	3	125.38
OBGY31A	4	3	155.01
OBGY32A	4	3	312.69
OBGY34A	4	3	88.77
OBGY35A	4	3	215.78
OBGY36A	4	3	404.55
OBGY38A	4	3	117.14
OBGY39A	4	3	667.5
OBGY40A	4	3	181.38
