# Supplementary material for: Decision Support System (DSS) for Fraud Detection in Health Insurance Claims Using Genetic Support Vector Machines (GSVMs)
Source: Hindawi journal article supplement (doi:10.1155/2019/1432597), 2019-09-02
Supplement: f1 [file 1432597.f1.zip › 1432597.f1/ReData4_750_1.xlsx]

## Sheet: Sheet1
No.	Attendance Date	Discharge Date	Age	Sex	Folder No	NHIS ID No	Procudure	Diagnosis	G-DRG	ICD10	Service	Medical	Total	Output
1	2012-12-25	2012-12-31	22	F	421455	66989440	LAPAROLONY	ABDOMIAL TRIRY 2 FRAUMA	ASRO8A	T14.0	332.02	91.2	423.22	Legal
2	2013-01-21	2013-01-28	38	F	46489	63313932	THYRIODECTOMY	TOXIC MULTINODULER GOITRE	ASUR01A	D44.0	339.04	71.38	410.42	Legal
3	2013-01-03	2013-01-08	21	F	69363	16437273	APPENCEMTOMY	ACUTE APPENDCSTIS	ASUR08A	K37.7	332.02	132.2	464.22	Legal
4	2013-01-03	2013-01-11	32	F	270830	16369104	LAPAROTOMY	APPENDICITIS	ASUR08A	K37.7	332.02	110.05	442.07	Legal
5	2013-01-04	2013-01-14	32	F	422671	71258176	LAPAROTOMY	APPENDICITIS	ASUR08A	K37.7	332.02	213.1	545.12	Fraudulent
6	2013-01-16	2013-01-25	38	M	424538	89745566	LAPAROTOMY	PERITONITIS	ASUR08A	K65.9	332.02	78.84	410.86	Legal
7	2013-01-06	2013-01-11	14	M	423000	47979145	APPENCEMTOMY	ACUTE APPENDCSTIS	ASUR08A	K37.7	332.02	39.5	371.52	Legal
8	2013-12-30	2013-01-02	39	M	422066	16422413	APPENCEMTOMY	APPENDICITIS	ASUR08A	K37.7	332.02	39.7	371.72	Legal
9	2013-01-12	2013-01-25	52	F	62002	55060951	APPENCEMTOMY	APPENDICITIS	ASUR08A	K37.7	332.02	74.04	406.06	Legal
10	2013-01-14	2013-01-16	15	M	424033	61273367	APPENCEMTOMY	APPENDICITIS	ASUR08A	K37.7	332.02	101.74	433.76	Legal
11	2013-01-09	2013-01-11	26	F	422659	71979225		PERFIRATION	ASUR09A	A01.0	64.09	46.24	110.33	Legal
12	2013-01-18	2013-01-22	49	M	228713	16467451		ACUTE EPIDIDYMO	ASUR09A		64.09	29.04	93.13	Legal
13	2013-01-20	2013-01-23	69	M	425175	77858288		VARICEAL BLEEDING	ASUR09A	I85.9	64.09	13.74	77.83	Legal
14	2013-01-03	2013-01-06	34	M	420296	85334094	HERNIA REPAIR HYDROCELECTOMY	MESENTERIC HERNIA	ASUR19A	R46.9	267.8	57.95	325.75	Legal
15	2013-01-08	2013-01-10	18	F	423260	69264801	HERMORRHAPHY	STRANGULATED FERNORAL HERNIA	ASUR19A	K46.9	267.8	48.34	316.14	Legal
16	2013-01-03	2013-01-09	48	F	423109	16429713	HERMORRHAPHY	PARAUMBILICAL	ASUR20A	K42.9	144.82	63.22	208.04	Legal
17	2013-01-29	2013-01-31	80	M	422093	79413422	HERNMORRAPHY	RIGHT HIGUNIAL HERNIPLAPHY	ASUR20A	K40.9	144.82	71.14	215.96	Legal
18	2013-01-21	2013-01-25	78	M	421333	17073387	HERMORRHAPHY	INGMINAL HERNIA	ASUR20A	K40.9	144.82	33.3	178.12	Legal
19	2013-01-03	2013-01-21	68	M	141891	26922133	PROSTATESTOMY	BENING PROSTATIC HYPERTROPHY	ASUR21A	N40	478.14	76.8	554.94	Legal
20	2013-01-20	2013-01-25	58	M	425185	82879407	SURGERY ON SCROTUM	TORSION OF TESTIS	ASUR22A	N44	126.1	59.54	185.64	Legal
21	2013-01-03	2013-01-11	50	M	18919	16370459	INCISUN AND DRIANAGE	PALMER ABSCESS	ASUR31A	L02.9	141.44	160.24	301.68	Fraudulent
22	2013-01-08	2013-01-19	35	F	423402	60381032	DEBRIDEMRNT	SEPTIC WOUND	ASUR31A	T79.30	141.44	356.4	497.84	Fraudulent
23	1-23-2013	1-23-2013	34	F	0162-13	81753790	EXTRACTION	APICALPERIODDICALITY	DENT01A		15.47		15.47	Legal
24	1-23-2013	1-23-2013	77	F	0253-13	55952646	EXTRACTION	APICALPERIODDICALITY	DENT01A		15.47		15.47	Legal
25	1-23-2013	1-23-2013	9	M	2174-12	16371882	EXTRACTION	CARIES	DENT01A		14.95		14.95	Legal
26	1-23-2013	1-23-2013	31	F	0248-13	67416693	EXTRACTION	APICALPERIODDICALITY	DENT01A		15.47		15.47	Legal
27	1-23-2013	1-23-2013	29	M	0262-13	75402323	EXTRACTION	APICALPERIODDICALITY	DENT01A		15.47		15.47	Legal
28	1-31-2013	1-31-2013	6	M	1306-11	16817208	EXTRACTION	APICALPERIODDICALITY	DENT01A		14.95		14.95	Legal
29	1-31-2013	1-31-2013	25	F	0375-13	80166265	EXTRACTION	PERIODITIS	DENT01A		15.47		15.47	Legal
30	2013-10-01	2013-10-01	45	F	0083-13	16380545	EXTRACTION	APICALPERIODDICALITY	DENT01A		15.47		15.47	Legal
31	1-31-2013	1-31-2013	25	M	0338-13	82681192	EXTRACTION	APICALPERIODDICALITY	DENT01A		15.47		15.47	Legal
32	2013-09-01	2013-09-01	83	F	0065-13	16493572	EXTRACTION	CARIES	DENT01A		15.47		15.47	Legal
33	2013-09-01	2013-09-01	10	F	1506-09	16414199	EXTRACTION	CARIES	DENT01A		14.95		14.95	Legal
34	2013-08-01	2013-08-01	57	F	0086-13	16502593	EXTRACTION	CARIES	DENT01A		15.47		15.47	Legal
35	2013-10-01	2013-10-01	34	M	0081-13	52399381	EXTRACTION	CARIES	DENT01A		15.47		15.47	Legal
36	2013-10-01	2013-10-01	45	F	4474-09	55470108	EXTRACTION	CARIES	DENT01A		15.47		15.47	Legal
37	2013-10-01	2013-10-01	39	F	1846-08	84894948	EXTRACTION	CARIES	DENT01A		15.47		15.47	Legal
38	2013-10-01	2013-10-01	57	F	1145-07	67083596	EXTRACTION	APICALPERIODDICALITY	DENT01A		15.57		15.57	Legal
39	2013-10-01	2013-10-01	66	F	0097-13	61376326	EXTRACTION	CARIES	DENT01A		15.47		15.47	Legal
40	2013-10-01	2013-10-01	20	M	0053-13	16418234	EXTRACTION	CARIES	DENT01A		15.47		15.47	Legal
41	2013-10-01	2013-10-01	6	F	0078-13	62848849	EXTRACTION	CARIES	DENT01A		14.95		14.95	Legal
42	1-31-2013	1-31-2013	9	M	0377-13	66845370	EXTRACTION	RETAINED ROOT	DENT01C		14.95	2.3	17.25	Legal
43	1-18-2013	1-18-2013	8	M	0085-13	16393330	EXTRACTION	CARIES	DENT01C		14.95		14.95	Legal
44	1-18-2013	1-18-2013	6	F	4836-12	51430060	EXTRACTION	CARIES	DENT01C		14.95		14.95	Legal
45	1-28-2013	1-28-2013	10	M	4013-12	74936113	EXTRACTION	CARIES	DENT01C		14.95	2.5	17.45	Legal
46	1-30-2013	1-30-2013	7	M	0332-13	66962221	EXTRACTION	APICAL PEROIDONITITS	DENT01C		14.95		14.95	Legal
47	2013-10-01	2013-10-01	10	M	0060-13	54512774	EXTRACTION	CARIES	DENT01C		14.95		14.95	Legal
48	2013-10-01	2013-10-01	5	M	0032-13	63427090	EXTRACTION	CARIES	DENT01C		15.47		15.47	Legal
49	2013-10-01	2013-10-01	10	F	0098-13	16378528	EXTRACTION	APICALPERIODDICALITY	DENT01C		14.95		14.95	Legal
50	2013-10-01	2013-10-01	5	F	0054-13	85299862	EXTRACTION	CARIES	DENT01C		14.95		14.95	Legal
51	2013-10-01	2013-10-01	5	M	PP81-13	81878067	EXTRACTION	CARIES	DENT01C		14.95		14.95	Legal
52	1-31-2013	1-31-2013	24	F	0196-12	16374480	EXTRACTION	RETAINED ROOT	DENT08A		49.01	1.8	50.81	Legal
53	2013-11-01	2013-11-01	35	F	4934-12	84164038	CONSULTATION	DRY SOCKET	DENT12A		150.28		150.28	Legal
54	2013-11-01	2013-11-01	35	F	0136-13	66610592	CURETTAGE OF SOCKET	DRY SOCKET	DENT12A		150.28		150.28	Legal
55	1-31-2013	1-31-2013	63	M	0376-13	16358187	EXTRACTION	FRACTURED	DENT20A		118.17		118.17	Legal
56	1-16-2013	1-16-2013	71	M		16364558			INVES41D		3.17		3.17	Fraudulent
57	1-15-2013	1-15-2013	38	M		35872721			INVES41D		3.17		3.17	Fraudulent
58	1-14-2013	1-14-2013	58	F		16380957			INVES41D		3.17		3.17	Fraudulent
59	1-14-2013	1-14-2013	64	F		16354489			INVES41D		3.17		3.17	Fraudulent
60	1-30-2013	1-30-2013	30	M		60665804			INVES52D		4.32		4.32	Fraudulent
61	2013-10-01	2013-10-01	42	F		42946565			INVES52D		4.32		4.32	Fraudulent
62	2013-08-01	2013-08-01	1	M		86153139			INVES52D		4.32		4.32	Fraudulent
63	2013-07-01	2013-07-01	46	M		44326302			INVES52D		4.32		4.32	Fraudulent
64	2013-11-01	2013-11-01	4	M		75155982			INVES56D		2.93		2.93	Fraudulent
65	1-15-2013	1-15-2013	45	M		54066893			INVES58D		12.09		12.09	Fraudulent
66	1-18-2013	1-18-2013	49	M		77424687			INVES58D		12.09		12.09	Fraudulent
67	1-18-2013	1-18-2013	76	F		84112681			INVES58D		12.09		12.09	Fraudulent
68	1-18-2013	1-18-2013	54	M		52816434			INVES58D		12.09		12.09	Fraudulent
69	1-16-2013	1-16-2013	67	F		56694726			INVES58D		12.09		12.09	Fraudulent
70	1-16-2013	1-16-2013	68	F		15584735			INVES58D		12.09		12.09	Fraudulent
71	1-16-2013	1-16-2013	17	M		67132608			INVES58D		12.09		12.09	Fraudulent
72	2013-09-01	2013-09-01	36	F		48641475			INVES58D		12.09		12.09	Fraudulent
73	2013-07-01	2013-07-01	63	M		16511337			INVES58D		12.09		12.09	Fraudulent
74	2013-04-01	2013-04-01	59	F		16393830			INVES75D		7.28		7.28	Fraudulent
75	2013-02-01	2013-02-01	22	M		62689854			INVES75D		7.28		7.28	Fraudulent
76	2013-03-01	2013-03-01	58	F		63056129			INVES75D		7.28		7.28	Fraudulent
77	2013-04-01	2013-04-01	63	F		16444597			INVES75D		7.28		7.28	Fraudulent
78	1-15-2013	1-15-2013	63	F		16451103			INVES75D		7.28		7.28	Fraudulent
79	1-24-2013	1-24-2013	73	M		16439445			INVES75D		7.28		7.28	Fraudulent
80	1-22-2013	1-22-2013	54	F		53546959			INVES75D		7.28		7.28	Fraudulent
81	1-15-2013	1-15-2013	73	M		15569754			INVES89D		12.09		12.09	Fraudulent
82	1-15-2013	1-15-2013	49	F		16396800			INVES89D		12.09		12.09	Fraudulent
83	1-15-2013	1-15-2013	60	F		65830549			INVES89D		12.09		12.09	Fraudulent
84	1-15-2013	1-15-2013	47	M		64203148			INVES89D		12.09		12.09	Fraudulent
85	1-30-2013	1-30-2013	6	M		67130880			INVES89D		12.09		12.09	Fraudulent
86	1-17-2013	1-17-2013	28	F		86605774			INVES89D		12.09		12.09	Fraudulent
87	1-17-2013	1-17-2013	56	M		16390759			INVES89D		12.09		12.09	Fraudulent
88	1-18-2013	1-18-2013	47	M		50536880			INVES89D		12.09		12.09	Fraudulent
89	2013-03-01	2013-03-01	72	F		53714072			INVES90D		16.04		16.04	Fraudulent
90	2013-03-01	2013-03-01	56	M		82573784			INVES90D		16.04		16.04	Fraudulent
91	1-24-2013	1-24-2013	64	M		60568304			INVES90D		16.04		16.04	Fraudulent
92	1-24-2013	1-24-2013	62	F		51340149			INVES90D		16.04		16.04	Fraudulent
93	1-28-2013	1-28-2013	59	F		17623354			INVES90D		16.04		16.04	Fraudulent
94	1-18-2013	1-18-2013	60	F		66666318			INVES90D		16.04		16.04	Fraudulent
95	1-14-2013	1-14-2013	17	M		16373379			INVES90D		16.04		16.04	Fraudulent
96	2013-09-01	2013-09-01	66	F		85428029			INVES90D		16.04		16.04	Fraudulent
97	2013-07-01	2013-07-01	39	F		36600316			INVES90D		16.04		16.04	Fraudulent
98	1-14-2013	1-14-2013	46	F		64914656			INVES90D		16.04		16.04	Fraudulent
99	2013-09-01	2013-09-01	67	F		16518708			INVES90D		16.04		16.04	Fraudulent
100	1-15-2013	1-15-2013	65	M		55700419			INVES90D		16.04		16.04	Fraudulent
101	1-17-2013	1-17-2013	65	F		43855973			INVES90D		16.04		16.04	Fraudulent
102	1-23-2013	1-26-2013	87	F	129085	16423899		HYPERGLYCAEMIA	MED102A	E14	190.45	44.05	234.5	Fraudulent
103	2013-10-01	1-17-2013	22	F	423632	89844502		DIABETES	MEDI02A		104.65	34.75	139.4	Legal
104	2012-12-25	2012-12-28	45	F	78850	16526892		DIABETIES	MEDI02A	E10	104.65	45.8	150.45	Legal
105	2012-12-16	2012-12-27	50	M	420040	58504487		DIABETES MELHTUS	MEDI02A	E10	104.65	94.92	199.57	Fraudulent
106	2012-12-19	2013-01-10	56	M	420305	16463671		DIABETES COMPLICATED	MEDI03A	E14.0	190.45	52.7	243.15	Legal
107	2012-12-26	2013-01-02	67	M	421707	38030758		DIABETES MELLITUS	MEDI03A	E14.0	190.45	6.8	197.25	Legal
108	2013-01-04	2013-01-07	64	M	421687	89633935		DIABETES(HYPERGLYCAENIL)	MEDI03A	E87.0	190.45	5.6	196.05	Legal
109	1-21-2013	1-29-2013	54	F	425279	85350591		DIABETES MELLITUS COMPLICATED	MEDI03A	E14.0	190.45	136.51	326.96	Legal
110	2013-07-01	1-15-2013	54	F	423195	85744799		HYPERGLYCAEMIA	MEDI03A	E74	190.45	73	263.45	Legal
111	1-14-2013	1-19-2013	52	F	424231	85992838		HYPERGLYCAEMIA	MEDI03A	E87	190.45	35.15	225.6	Legal
112	2013-08-01	1-14-2013	47	F	59762	16420246		DIABETES MELLITUS	MEDI03A	E14.0	190.45	17.4	207.85	Legal
113	2013-04-01	2013-11-01	38	F	422743	16008958		HYPERTENSION	MEDI03A	E87.0	190.45	140.81	331.26	Legal
114	2013-04-01	2013-11-01	32	M	422776	72008858		COMPLICATED DIABETES MELITUS	MEDI03A	E14.0	190.45	96.9	287.35	Legal
115	2013-07-01	1-15-2013	73	F	388934	61255181		HYPERGLYCAEMIA	MEDI03A	E87.0	190.45	94.22	284.67	Legal
116	2013-05-01	2013-07-01	74	F	422823	16368463		HYPERGLYCAEMIA	MEDI03A		190.45	5.6	196.05	Legal
117	1-21-2013	1-22-2013	26	F	420818	87728617		SEVERE ANAEMIA	MEDI06A	D51.9	128.83	18.56	147.39	Legal
118	2013-09-01	2013-11-01	37	F	423524	50825407		SEVERE ANAEMIA	MEDI06A	D51.9	147.42	0.06	147.48	Legal
119	1-25-2013	1-29-2013	14	F	421438	77474442		ANAEMIA	MEDI06A	D50.9	128.83	2.2	131.03	Legal
120	2013-08-01	1-26-2013	82	M	421119	16356348		SEVERE ANAMIA	MEDI06A		128.83	56.92	185.75	Legal
121	1-23-2013	1-25-2013	16	F	425759	83513790		SEVERE ANAMIA	MEDI06A		128.83	12.01	140.84	Legal
122	1-13-2013	1-16-2013	24	F	188653	24728479		SEVERE ANAMIA	MEDI06A		128.83	23.6	152.43	Legal
123	2013-10-01	1-16-2013	38	F	423682	16427013		SEVERE ANAMIA	MEDI06A		147.42	80.78	228.2	Fraudulent
124	2013-04-12	2013-12-01	77	F	382466	16448836		ANAMIA	MEDI06A		128.83	0.96	129.79	Legal
125	2013-09-01	2013-11-01	36	F	423434	80178334		SEVERE ANAMIA	MEDI06A		128.83	4.06	132.89	Legal
126	2012-12-28	2012-12-31	76	M	70020	16533792		ANEAMIA	MEDI06A	D51.9	128.83	11.5	140.33	Legal
127	2012-12-20	2012-12-28	64	M	394402	52458162		SEVERE ANAEMIA	MEDI06A	D50.9	128.83	41.86	170.69	Legal
128	2012-11-22	2012-12-26	16	F	416670	58416174		SEVERE ANAEMIA	MEDI06A	D51.9	147.42	8.96	156.38	Legal
129	2012-12-08	2013-01-03	13	M	338510	65888527		HAERT FAILURE	MEDI07A	I50	155.87	21.82	177.69	Legal
130	1-25-2013	1-30-2013	63	M	426024	16386982		HEART DISEASE	MEDI07A	I50.9	155.87	13.2	169.07	Legal
131	1-21-2013	1-23-2013	53	M	232564	55451256		CCF	MEDI07A	I50.9	155.87	15	170.87	Legal
132	2013-10-01	1-29-2013	39	F	127957	19597671		PLERAL EFFUSION	MEDI07A	I31.3	155.87	81.21	237.08	Legal
133	2013-09-01	2013-12-01	60	F	408469	69626751		CONGESTIVE CARDIAC	MEDI07A	I50.9	155.87	9.8	165.67	Legal
134	1-17-2013	1-19-2013	27	F	423995	82719059		CONGESTIVE CARDIAC FAILURE	MEDI07A	I50.9	155.87	3.2	159.07	Legal
135	1-18-2013	1-21-2013	69	F	424987	68534588		CONGESTIVE CARDIAC FAILURE	MEDI07A	I50.9	155.87	25.1	180.97	Legal
136	1-23-2013	1-27-2013	41	M	425800	73584632		CONGESTIVE CARDIAC FAILURE	MEDI07A	I50.9	155.87	14.85	170.72	Legal
137	2013-11-01	1-15-2013	77	M	422747	64589845		CONGESTIVE CARDIA FAILURE	MEDI07A		155.87	2.7	158.57	Legal
138	2013-07-01	1-14-2013	67	F	36021	16426957		HYPERTENSION	MEDI07A		155.87	31.23	187.1	Legal
139	2012-12-28	2012-12-30	89	F	421790	16474096		CONGESTIVE CARDIAC FAILURE	MEDI07A	I50.9	155.87	48.44	204.31	Legal
140	2012-12-13	2012-12-28	89	M	419660	16513223		CONGESTIVE CARDIAC FAILURE	MEDI07A	I50.9	155.87	314.04	469.91	Fraudulent
141	2012-12-15	2012-12-23	77	M	419725	16429980		HEART DISEASE	MEDI07A	I50.9	158.47	162.13	320.6	Fraudulent
142	2013-03-01	2013-06-01	71	F	422480	75130904		OLD CEREBROVASCULAR ACCIDENT	MEDI14A	I64	128.18	60.5	188.68	Legal
143	1-28-2013	2013-01-02	73	M	389939	16395886		CEREBROVASCULAR ACCIDENT	MEDI14A		128.18	165.85	294.03	Fraudulent
144	2012-12-14	2012-12-30	69	F	419882	80621444		CEREBRO VASCULAR ACCIDENT	MEDI14A	I64	128.18	333.41	461.59	Fraudulent
145	2012-12-25	2012-12-27	35	F	420171	30968375		SEVERE HYPERTENSION	MEDI14A	I64	128.18	16.62	144.8	Legal
146	2012-12-16	2012-12-28	60	F	419008	84609748		CEREBRO VASCULAR ACCIDENT	MEDI14A	I64	128.18	268.27	396.45	Fraudulent
147	2012-12-19	2012-12-27	67	F	420552	84192405		CEREBRO VASCULAR ACCIDENT	MEDI14A	I64	104.65	134.12	238.77	Fraudulent
148	2012-12-19	2012-12-21	45	M	420468	16422350		CEREBRO VASCULAR ACCIDENT	MEDI14A	I64	128.18	48.66	176.84	Legal
149	2012-12-20	2012-12-27	82	F	387954	44679240		CEREBRO VASCULAR ACCIDENT	MEDI14A	I64	128.18	223.82	352	Fraudulent
150	2013-01-01	2013-01-06	21	F	226570	16538099		SICKLE CELL DISEASE	MEDI16A	D57.1	123.11	31.17	154.28	Fraudulent
151	2013-01-03	2013-01-07	18	M	287520	58748433		SICKLE CELL DISEASE(CRISIS)	MEDI16A	D57.1	123.11	52.9	176.01	Legal
152	2013-01-22	2013-01-25	16	F	372290	82938058		SICKLE CELL DISEASE	MEDI16A	D57.1	123.11	19.06	142.17	Legal
153	1-16-2013	1-20-2013	15	F	177977	16483632		SICKLE CELL DISEASE	MEDI16A	D57.1	123.11	97.77	220.88	Fraudulent
154	1-17-2013	1-20-2013	34	F	269866	67135672		MALARIA	MEDI16A	D57.1	123.11	39.8	162.91	Legal
155	1-15-2013	1-18-2013	15	F	177977	16483632		SICKLE CELL DISEASE	MEDI16A	D57.1	117.65	210.14	327.79	Fraudulent
156	1-17-2013	1-24-2013	27	F	424927	61272094		SCD	MEDI16A		123.11	49.26	172.37	Legal
157	1-14-2013	1-17-2013	21	M	25994	16356550		SCD	MEDI16A		170.43	34.93	205.36	Fraudulent
158	1-14-2013	1-24-2013	12	M	44586	16476035		MALARIA SERVERE	MEDI16A		123.11	118.43	241.54	Fraudulent
159	1-22-2013	1-25-2013	23	M	338438	57179669		SCD	MEDI16A		123.11	29.01	152.12	Legal
160	1-23-2013	1-29-2013	20	F	425695	68647912		SCD	MEDI16A		123.11	53.49	176.6	Legal
161	2013-09-01	2013-11-01	14	F	395566	15605453		SCD	MEDI16A		123.11	36.91	160.02	Legal
162	2013-04-01	2013-10-01	14	M	44586	16476035		SEVERE ANAMIA	MEDI16A		123.11	41.9	165.01	Fraudulent
163	2013-01-01	2013-03-01	21	F	61694	16505227		SCD	MEDI16A		123.11	24	147.11	Legal
164	2012-12-27	2012-12-30	20	F	226570	16538099		SICKLE CELL DISEASES	MEDI16A	I57.9	123.11	32.2	155.31	Fraudulent
165	2012-12-22	2012-12-24	27	M	420707	62890156		SICKLE CELL WITH VASCOCELUTIVE CRISIS	MEDI16A	D57.1	123.11	9	132.11	Legal
166	2012-12-10	2012-12-13	28	F	419302	66988738		SICKLE CELL DISEASE	MEDI16A	D57.1	123.11	26.06	149.17	Legal
167	2012-12-30	2013-01-05	81	M	422093	79413442		UPPER GI BLEEDING	MEDI17A	D68.9	168.35	145.98	314.33	Fraudulent
168	2016-12-13	2013-01-02	41	F	419662	52096193		EXTENSIVE BURNS	MEDI18A		316.68	107.56	424.24	Fraudulent
169	2012-12-07	2012-12-24	73	F	414633	87174962		BURNS	MEDI18A	T30.0	316.68	305.55	622.23	Fraudulent
170	2013-05-01	2013-08-01	64	F	423010	58607252		HYPERTENSION	MEDI20A		104.65	46.2	150.85	Legal
171	2012-12-22	2012-12-26	22	M	421048	60787021		CHRONIC RENSL FAILURE	MEDI20A	N18.9	123.37	34.48	157.85	Legal
172	2013-01-25	2013-01-27	25	F	420929	28537829		ACUTE ASTHMATIC ATTSCK	MEDI22A	I45.9	65.52	84.84	150.36	Fraudulent
173	2012-12-15	2012-12-20	39	F	419910	16488171	E.O.U	THREATENG ABORTION	OBGY06A	OO6	64.09	20.21	84.3	Legal
174	2012-12-13	2012-12-20	37	F	419658	87890732	E.O.U	INEVITABLE ABORTION	OBGY06A	OO6	72.8	33.86	106.66	Fraudulent
175	2012-12-17	2012-12-20	36	F	268158	76313282	E.O.U	RETAINED PLACENTA	OBGY06A	OO6	72.8	40.9	113.7	Fraudulent
176	2012-12-30	2013-01-01	19	F	387473	69991605		PRAPERAL SEPSIS	OBGY09A	O26.9	64.09	39.22	103.31	Fraudulent
177	2013-01-06	2013-01-07	39	F	380623	73699782		BLEEDING UTERINE FAROID	OBGY09A	O26.9	64.09	1.16	65.25	Legal
178	2012-12-26	2013-01-07	33	F	408279	61273124		GESTATIONAL DIABETES	OBGY09A	O26.10	64.09	56	120.09	Fraudulent
179	2013-01-05	2013-01-08	40	F	423017	84729269	ANTE NATAL	PREMATURE RUOTURE OF MEMBRENES	OBGY09A	O26.9	64.09		64.09	Legal
180	2013-01-07	2013-01-08	22	F	423039	55473020		URENERY TRACT INFECTION	OBGY09A	26.9	64.09	3.66	67.75	Legal
181	2013-01-11	2013-01-12	25	F	408273	67373257		POST DATE	OBGY09A		64.09		64.09	Legal
182	2013-01-09	2013-01-12	35	F	421886	16386299		CHRONIC HYPERTENSION	OBGY09A		64.09	27.06	91.15	Fraudulent
183	2013-01-10	2013-01-14	49	F	413512	16374885		DEGENERATING UTERINE FIBROID	OBGY09A	O26.9	64.09	11.9	75.99	Legal
184	2013-01-14	2013-01-17	31	F	405540	82668005		CHRONIC HYPERTENSION	OBGY09A	O26.9	64.09	36.6	100.69	Fraudulent
185	2012-12-31	2013-01-03	34	F	355872	63290002		HYPEREMESIS GRAVIDARIUM	OBGY09A	O26.9	64.09	17.05	81.14	Fraudulent
186	2012-12-31	2013-01-02	35	F	393275	85890604		GASTOEUTENTS IN CYESIS	OBGY09A	O26.9	64.09	11.2	75.29	Fraudulent
187	2012-12-31	2013-01-03	30	F	422180	66666200		ECTOPIC GESTATION	OBGY09A	O26.9	64.09	33.6	97.69	Fraudulent
188	2012-12-28	2013-01-01	37	F	414517	87913400		HYPEREMESIS GRAVIDARIUM	OBGY09A	O26.9	64.09	22.25	86.34	Fraudulent
189	2012-12-29	2013-01-01	32	F	221513	50384777		INCOMPLETE ABORTION	OBGY09A	O26.9	64.09	4	68.09	Legal
190	2013-01-17	2013-01-21	24	F	423860	17445273		ECLAMPSIA	OBGY09A	O26.9	64.09	143.16	207.25	Fraudulent
191	2013-01-11	2013-01-14	35	F	422696	89797739		MENORRHAGIA R/O ABORTION	OBGY09A	O26.9	64.09	33.36	97.45	Fraudulent
192	2013-01-08	2013-01-14	22	F	423310	86479829		INTRA UTERINE DEATH	OBGY09A	O26.9	64.09	43.18	107.27	Fraudulent
193	2012-12-29	2013-01-16	35	F	422023	68364250		CHRONIC HYPERTENSION IN CYESIS	OBGY09A	O26.9	64.09	73.7	137.79	Fraudulent
194	2013-01-10	2013-01-15	35	F	420952	85413176		PREVIOUS CAESAREAN SECTION AT TERM	OBGY09A		64.09		64.09	Legal
195	2013-01-09	2013-01-15	18	F	419517	10465485		PREVIOUS CAESAREAN SECTION AT TERM	OBGY09A		64.09		64.09	Legal
196	2013-01-16	2013-01-16	20	F	421882	16757277		PREGNANCY INDUCED	OBGY09A		64.09		64.09	Legal
197	2013-01-09	2013-01-15	35	F	421873	88508880		CHRONIC HYPERTENSION	OBGY09A		64.09	29.88	93.97	Fraudulent
198	2013-01-11	2013-01-15	36	F	404454	82420373		PREVIOUS CAESAREAN SECTION AT TERM	OBGY09A		64.09		64.09	Legal
199	2013-01-14	2013-01-15	24	F	423900	82303294		POSRT PARTUM EDAMPSIA	OBGY09A	O26.9	64.09	41.18	105.27	Fraudulent
200	2013-01-15	2013-01-17	31	F	419548	89126198		SEVERE PRE-ECLAMPSIA	OBGY09A	O26.9	64.09	47.64	111.73	Fraudulent
201	2013-01-16	2013-01-17	35	F	424315	67124115		EXCESSIVE VOMITING IN PREGNANCY	OBGY09A	O26.9	64.09	41.25	105.34	Fraudulent
202	2013-01-14	2013-01-16	30	F	417557	88737634		PLACENTA PRAAIG	OBGY09A	O26.9	64.09	12.96	77.05	Legal
203	2013-01-22	2013-01-27	25	F	393065	82682360	CEASAREAN SECTION	FOETAL DISTRESS	OBGY32A	O26.9	231.14	92.03	323.17	Fraudulent
204	2013-01-22	2013-01-27	29	F	418656	16508596	CEASAREAN SECTION	PRE- ECLAMPSIA	OBGY32A	O26.9	231.14	77.72	308.86	Legal
205	2013-01-23	2013-01-25	32	F	425563	84906425	CEASAREAN SECTION	C/S O/A SEVERE PRE-ECLAMPSIA	OBGY32A	O26.9	231.14	45.6	276.74	Legal
206	2013-01-21	2013-01-25	28	F	213631	49454346	CEASAREAN SECTION	C/S O/A ANTEPARTUM HEMMORRHAGE	OBGY32A	O67.9	231.14	141.36	372.5	Fraudulent
207	2013-01-23	2013-01-25	30	F	425094	56396896	CEASAREAN SECTION	C/S O/A RUPTURED UTERUS	OBGY32A	O26.9	231.14	130.34	361.48	Fraudulent
208	2013-01-21	2013-01-25	33	F	394122	78436803	CEASAREAN SECTION	LUSCS O/A EARLY PRIM TERM	OBGY32A	O26.9	231.14	83.28	314.42	Fraudulent
209	2013-01-22	2013-01-25	32	F	399081	23670661	CEASAREAN SECTION	C/S O/A 1 PREVIOUS	OBGY32A	O26.9	231.14	78.8	309.94	Legal
210	2013-01-21	2013-01-25	25	F	389817	65572645	CEASAREAN SECTION	C/S O/A PROLONGED	OBGY32A	O26.9	231.14	98.43	329.57	Fraudulent
211	2013-01-22	2013-01-26	22	F	425395	65475446	CEASAREAN SECTION	LUSCS O/A ECLAMPSIA	OBGY32A	O26.9	231.14	85.06	316.2	Fraudulent
212	2013-01-23	2013-01-27	28	F	425812	83663049	CEASAREAN SECTION	CEPHSLIC PELVIC	OBGY32A	O26.9	231.14	89.78	320.92	Fraudulent
213	2013-01-22	2013-01-27	36	F	406983	46842246	CEASAREAN SECTION	O/A PREVIOUS CAESAREAN SECTION	OBGY32A	O26.9	231.14	65.78	296.92	Legal
214	2013-01-24	2013-01-27	26	F	398860	45040256	CEASAREAN SECTION	O/A 2PREVIOUS CAESAREAN SECTION	OBGY32A	O26.9	231.14	63.68	294.82	Legal
215	2013-01-09	2013-01-21	26	F	412320	60374492	CEASAREAN SECTION	1PREVIOUS C/SECTION	OBGY32A	O26.9	231.14	167.02	398.16	Fraudulent
216	2013-01-09	2013-01-12	26	F	379543	78293449	CEASAREAN SECTION	PREVIOUS C/SECTION	OBGY32A	O26.9	231.14	25.52	256.66	Legal
217	2012-12-18	2012-12-21	32	F	420336	83387164	CEASAREAN SECTION	OBSTRUCTED LABOUR	OBGY32A	O26.9	231.14	108.36	339.5	Fraudulent
218	2012-12-16	2012-12-19	32	F	420038	82669888	CEASAREAN SECTION	FETAL DISEASE, CPD	OBGY32A	P20	231.14	102.9	334.04	Fraudulent
219	2012-12-15	2012-12-19	35	F	415583	81620568	CEASAREAN SECTION	SEVERE PRE-ECLARPSIE	OBGY32A	O26.9	231.14	100.26	331.4	Fraudulent
220	2012-12-25	2012-12-31	31	F	417572	15730887	CEASAREAN SECTION	LUSCS PEREVS	OBGY32A	26.9	231.14	81.64	312.78	Fraudulent
221	2012-12-27	2012-12-31	23	F	401401	82610003	CEASAREAN SECTION	FOETAL DISTRESS	OBGY32A	P20	231.14	103.46	334.6	Fraudulent
222	2012-12-27	2012-12-31	30	F	421658	86528625	CEASAREAN SECTION	ABRUPTIO PLACENTA	OBGY32A	O26.9	231.14	60.88	292.02	Legal
223	2016-01-01	2016-01-01	55	M	NP-30-13	35174927	ELECTRO THERAPY	LUMBAR SPONDYLASIS	OPDC011D		35.7		35.7	Fraudulent
224	2013-02-01	2013-02-01	57	F	2013-02-01	28589137	ELECTRO THERAPY	LOWBACK PAIN	OPDC011D		35.7		35.7	Fraudulent
225	2013-10-12	2013-10-12	45	M	NP-1142-12	84367299	ELECTRO THERAPY	RT KNEE PAIN	OPDC011D		35.7		35.7	Fraudulent
226	2013-04-01	2013-04-01	49	F	1112-12	16504028	EXERCISE THERAPY	LT ROTATOR CUFF TENDINTIS	OPDC011D		35.7		35.7	Fraudulent
227	2013-04-01	2013-04-01	58	F	NP-1131-12	61819051	ELECTRO THERAPY	LUMBAR SPONDYLASIS	OPDC011D		35.7		35.7	Fraudulent
228	2013-04-01	2013-04-01	80	F	NP-1083-12	16365194	ELECTRO THERAPY	FOOT DROP	OPDC011D		35.7		35.7	Fraudulent
229	2013-02-01	2013-02-01	47	M	NP-1198-12	46800280	ELECTRO THERAPY	RT BELLS PALSY	OPDC011D		35.7		35.7	Fraudulent
230	2013-09-01	2013-09-01	46	M	1198-12	46800280	ELECTRO THERAPY	RT BELLS PALSY	OPDC011D		35.7		35.7	Fraudulent
231	2013-07-01	2013-07-01	56	M	NP-10-13	63601641	EXERCISE THERAPY	CVA	OPDC011D		35.7		35.7	Fraudulent
232	2013-09-01	2013-09-01	76	F	NP-20-13	17435564	ELECTRO THERAPY	CERVICAL SPONDYOSIS	OPDC011D		35.7		35.7	Fraudulent
233	2013-09-01	2013-09-01	46	M	NP-1172-12	61342925	ELECTRO THERAPY	LUMAR SPONDYLOSIS	OPDC011D		35.7		35.7	Fraudulent
234	1-18-2013	1-18-2013	9	M	NP-1186-12	75300892	THERMOTHERAPY	LIMITED ROM LT ELBOW	OPDC011D		35.7		35.7	Fraudulent
235	1-14-2013	1-14-2013	57	F	NP-02-13	28589137	THERMOTHERPY	PARAPARSIS	OPDC011D		35.7		35.7	Fraudulent
236	1-15-2013	1-15-2013	52	M	NP-1180-12	16412107	ELECTRO THERAPY	LUMBAR SPONDYLOSIS	OPDC011D		35.7		35.7	Fraudulent
237	2013-01-11	2013-01-11	28	F	389973	60394089			OPDC02A	80.9	13.27	0.66	13.93	Legal
238	2013-01-11	2013-01-11	30	F	408706	16462054			OPDC02A	80.9	13.27	0.06	13.33	Legal
239	2013-01-11	2013-01-11	30	F	415596	87649155			OPDC02A	80.9	13.27	0.66	13.93	Legal
240	2013-01-11	2013-01-11	28	F	419557	71405530			OPDC02A	80.9	13.27	0.36	13.63	Legal
241	2013-01-11	2013-01-11	27	F	413317	87675895			OPDC02A	80.9	13.27	0.36	13.63	Legal
242	2013-01-11	2013-01-11	33	F	226762	66335208			OPDC02A	80.9	13.27	0.56	13.83	Legal
243	2013-01-11	2013-01-11	30	F	415549	67414683			OPDC02A	80.9	13.27	0.36	13.63	Legal
244	2013-07-01	2013-07-01	6	F	0074-13	64534311	CONSULTATION	CARIES	OPDC03A		4.88		4.88	Legal
245	2013-08-01	2013-08-01	57	F	0101-13	24718581	CONSULTATION	GINGINTIS	OPDC03A		4.88		4.88	Legal
246	2013-10-01	2013-10-01	20	F	4841-12	16359555	CONSULTATION	CARIES	OPDC03A		4.88		4.88	Legal
247	2013-08-01	2013-08-01	17	M	0091-13	16519546	CONSULTATION	CARIES	OPDC03A		4.88		4.88	Legal
248	2013-09-01	2013-09-01	27	M	0122-13	69453752	CONSULTATION	GINGINTIS	OPDC03A		4.88		4.88	Legal
249	2013-10-01	2013-10-01	27	F	4816-12	84168848	CONSULTATION	CARIES	OPDC03A		4.88		4.88	Legal
250	2013-10-01	2013-10-01	75	F	0040-13	59399725	CONSULTATION	DENTALVATION	OPDC03A		4.88		4.88	Legal
251	2013-10-01	2013-10-01	45	M	0086-13	10734806	CONSULTATION	CARIES	OPDC03A		4.88		4.88	Legal
252	2013-04-01	2013-04-01	58	M	2926-12	37947076	CONSULTATION	CARIES	OPDC03A		4.88		4.88	Legal
253	1-21-2013	1-21-2013	40	F	4603-12	59710585	CONSULTATION	GINGINTIS	OPDC03A		4.88		4.88	Legal
254	1-21-2013	1-21-2013	22	M	0271-13	64621059	CONSULTATION	APICALPERIODDICALITY	OPDC03A		4.88		4.88	Legal
255	1-21-2013	1-21-2013	54	F	0273-13	62493862	CONSULTATION	PERIODITIS	OPDC03A		4.88		4.88	Legal
256	1-18-2013	1-18-2013	23	M	0244-13	75926859	CONSULTATION	CARIES	OPDC03A		4.88		4.88	Legal
257	2013-03-01	2013-03-01	15	F	399684	82207956			OPDC04A		5.81	24.7	30.51	Fraudulent
258	2013-03-01	2013-03-01	2	M	422559	70943081			OPDC04A		5.54	12	17.54	Fraudulent
259	2013-02-01	2013-02-01	16	M	422416	15670534			OPDC04A		5.81	4.9	10.71	Fraudulent
260	2013-02-01	2013-02-01	9	F	422415	44891004			OPDC04A		5.54	3.62	9.16	Legal
261	2013-02-01	2013-02-01	38	F	422398	52640264			OPDC04A		8.35	18.4	26.75	Fraudulent
262	2013-02-01	2013-02-01	6	M	236662	88513681			OPDC04A		5.54	6.02	11.56	Fraudulent
263	2013-03-01	2013-03-01	51	F	373491	64242046			OPDC04A		5.81	10.5	16.31	Fraudulent
264	2013-03-01	2013-03-01	9	F	422629	15757129			OPDC04A		5.51	11.83	17.34	Fraudulent
265	2013-04-01	2013-04-01	33	F	424096	56431010			OPDC04A		5.81	6.58	12.39	Fraudulent
266	1-14-2013	1-14-2013	21	M	424201	80460525			OPDC04A		5.81	15.4	21.21	Fraudulent
267	2013-04-01	2013-04-01	34	F	418500	82284383			OPDC04A		5.81	1.2	7.01	Legal
268	1-14-2013	1-14-2013	57	F	39478	16368210			OPDC04A		5.81	27.5	33.31	Fraudulent
269	1-14-2013	1-14-2013	3	M	414100	58700045			OPDC04A		5.51	12.63	18.14	Fraudulent
270	1-14-2013	1-14-2013	64	F	424206	66494350			OPDC04A		5.81	4.2	10.01	Legal
271	1-14-2013	1-14-2013	29	F	1172105	16501293			OPDC04A		5.81	7.2	13.01	Fraudulent
272	1-14-2013	1-14-2013	24	M	424133	65779240			OPDC04A		5.81	7.2	13.01	Fraudulent
273	1-14-2013	1-14-2013	31	M	419239	58421778			OPDC04A		5.81	0.7	6.51	Legal
274	2013-08-01	2013-08-01	68	M	420469	72486792			OPDC04A		5.81	0.7	6.51	Legal
275	1-14-2013	1-14-2013	47	F	393943	61207836			OPDC04A		5.81	4.7	10.51	Legal
276	2013-10-01	2013-10-01	19	F	139-13	50992175			OPDC05A		6.34		6.34	Legal
277	1-14-2013	1-14-2013	13	F	5471-11	52510002			OPDC05A		6.34		6.34	Legal
278	1-14-2013	1-14-2013	25	F	879-10	16509438			OPDC05A		6.34		6.34	Legal
279	2013-08-01	2013-08-01	7	M	108-13	80893531			OPDC05C		6.15	5.3	11.45	Fraudulent
280	2013-10-01	2013-10-01	10	F	3781-11	16496585			OPDC05C		6.15	2.1	8.25	Legal
281	1-31-2013	1-31-2013	2	F	6524-12	67966522			OPDC05C		6.15		6.15	Legal
282	1-22-2013	1-22-2013	5	M	6491-123	85288439			OPDC05C		6.15		6.15	Legal
283	1-22-2013	1-22-2013	5	F	2457-12	86597914			OPDC05C		6.15		6.15	Legal
284	1-15-2013	1-15-2013	4	F	248-13	67240780			OPDC05C		6.15		6.15	Legal
285	1-15-2013	1-15-2013	3	F	240-13	82563392			OPDC05C		6.15		6.15	Legal
286	1-15-2013	1-15-2013	7	M	1498-12	37277316			OPDC05C		6.15		6.15	Legal
287	1-14-2013	1-14-2013	2	F	205-13	86219801			OPDC05C		6.15		6.15	Legal
288	1-14-2013	1-14-2013	8	M	198-18	73632627			OPDC05C		6.15		6.15	Legal
289	1-15-2013	1-15-2013	3	F	1613-12	75271913			OPDC05C		6.15		6.15	Legal
290	1-14-2013	1-14-2013	11	M	5447-11	67327109			OPDC05C		6.15		6.15	Legal
291	2013-10-01	2013-10-01	4	F	4512-12	82291500			OPDC05C		6.15		6.15	Legal
292	1-14-2013	1-14-2013	1	F	187-13	83994237			OPDC05C		6.15		6.15	Legal
293	1-14-2013	1-14-2013	3	F	180-13	82764401			OPDC05C		6.15		6.15	Legal
294	2013-01-12	2013-01-12	25	F	404980	81880512			OPDC06A		6.16	9.15	15.31	Fraudulent
295	2013-12-11	2013-12-11	17	F	418581	85661459			OPDC06A		6.16		6.16	Legal
296	2013-01-08	2013-01-08	51	F	245575	41580440			OPDC06A		6.16	26.3	32.46	Fraudulent
297	2013-01-08	2013-01-08	30	F	ART 4410	66151741			OPDC06A		6.16	7.7	13.86	Fraudulent
298	2013-01-08	2013-01-08	56	M	418469	16460499			OPDC06A		6.16	93.3	99.46	Fraudulent
299	2013-01-08	2013-01-08	77	F	423318	16372108			OPDC06A		6.16	2.5	8.66	Legal
300	2013-01-08	2013-01-08	56	M	423341	17215743			OPDC06A		6.16	13.26	19.42	Fraudulent
301	2013-01-08	2013-01-08	55	F	243818	16358051			OPDC06A		6.16	12.6	18.76	Fraudulent
302	2013-01-08	2013-01-08	28	F	183796	36200339			OPDC06A		6.16	4.9	11.06	Legal
303	2013-01-02	2013-01-02	73	M	371475	16529930			OPDC06A		6.16		6.16	Legal
304	2013-01-02	2013-01-02	30	M	92884	16454362			OPDC06A		6.16	37.3	43.46	Fraudulent
305	2013-08-01	2013-08-01	6	F	351911	16448638			OPDC06C		5.98	1.2	7.18	Legal
306	2013-10-01	2013-10-01	5	F	423622	79473520			OPDC06C		5.98	1.5	7.48	Legal
307	2013-11-01	2013-11-01	1	F	421245	86018860			OPDC06C		5.98	2.25	8.23	Legal
308	2013-11-01	2013-11-01	2	F	329426	84366535			OPDC06C		5.98	12.25	18.23	Fraudulent
309	2013-11-01	2013-11-01	6	F	423756	79319521			OPDC06C		5.98		5.98	Legal
310	2013-11-01	2013-11-01	1	F	365964	79941653			OPDC06C		5.98		5.98	Legal
311	2013-11-01	2013-11-01	9	M	423755	79318760			OPDC06C		5.98		5.98	Legal
312	2013-11-01	2013-11-01	11	F	384178	50894367			OPDC06C		8.78	1.61	10.39	Legal
313	2013-11-01	2013-11-01	2	F	370577	78704881			OPDC06C		5.98	1.65	7.63	Legal
314	2013-11-01	2013-11-01	3	F	423732	66623008			OPDC06C		5.98	1.2	7.18	Legal
315	2013-11-01	2013-11-01	1	F	362716	83312046			OPDC06C		8.78	0.2	8.98	Legal
316	2013-11-01	2013-11-01	2	F	423784	69521768			OPDC06C		5.98	1	6.98	Legal
317	2013-11-01	2013-11-01	2	F	372705	63329552			OPDC06C		5.98		5.98	Legal
318	2013-11-01	2013-11-01	1	F	423761	82725443			OPDC06C		5.98	1.38	7.36	Legal
319	2013-06-01	2013-06-01	9	F	330367	16445181			OPDC06C		8.78	7	15.78	Fraudulent
320	2013-11-01	2013-11-01	3	F	347522	59844113			OPDC06C		5.98	2.65	8.63	Legal
321	2013-11-01	2013-11-01	1	F	408824	85433975			OPDC06C		5.98		5.98	Legal
322	2013-11-01	2013-11-01	1	F	356043	81073257			OPDC06C		5.98		5.98	Legal
323	2013-11-01	2013-11-01	2	F	342616	66774823			OPDC06C		5.98		5.98	Legal
324	2013-11-01	2013-11-01	3	F	282489	53114053			OPDC06C		5.98	0.06	6.04	Legal
325	2013-11-01	2013-11-01	8	F	259582	61199680			OPDC06C		5.98	1.81	7.79	Legal
326	12-20-2012	12-20-2012	30	F	420584	45796631	BANDAGING		ORTH01A		38.48		38.48	Legal
327	12-24-2012	12-24-2012	53	M	311009	66208775	BANDAGING	FRACTURE	ORTH01A		49.14		49.14	Legal
328	1-25-2013	1-25-2013	54	F	425198	82799732	BANDAGING	FIBULA FRACTURE	ORTH01C		36.14		36.14	Legal
329	1-24-2013	1-24-2013	62	M	425897	16495533	BANDAGING	COLLIES FRACYURE	ORTH01C		36.14		36.14	Legal
330	2013-07-01	2013-07-01	49	M	421304	63369414	BANDAGING	FRACTURED	ORTH01C		36.14		36.14	Legal
331	2013-04-01	2013-04-01	12	M	422807	16439100	BANDAGING	FRACTURED	ORTH01C		36.14	0.41	36.55	Legal
332	1-29-2013	1-29-2013	71	F	1009499	16473134	BANDAGING	FRACTURED	ORTH01C		46.02		46.02	Legal
333	1-29-2013	1-29-2013	8	M	422156	16458870	BANDAGING		ORTH01C		46.02		46.02	Legal
334	1-28-2013	1-28-2013	7	M	426095	38061628	BANDAGING		ORTH01C		46.02		46.02	Legal
335	1-29-2013	1-29-2013	3	M	342118	71868280	BANDAGING		ORTH01C		46.02		46.02	Legal
336	12-27-2012	12-27-2012	32	M	421268	81363087	EXCISTION		ORTH07A		85.93		85.93	Legal
337	2013-08-01	2013-08-01	24	F	363272	53381522	INASIAN AND DRESSING	ADSCESS LT THURB	ORTH11A		123.24	10.3	133.54	Legal
338	2012-01-02	2013-01-21	7	M	422488	81236976		FRACTURE OF TIBA/FIBIELAR	ORTH12C	T14.2	361.53	34.89	396.42	Legal
339	2012-12-26	2013-01-18	13	F	420480	43887013	ABOVE KNEE AMPITATION	AMPUTSTION	ORTH21A	R02	368.94	274.99	643.93	Fraudulent
340	2012-11-01	2012-12-27	72	M	412907	16422223	RIGHT ABOVEL. AMPUTATIVE	DIABETIC FOOT ULCER	ORTH21A	RO2	368.94	643.83	1012.77	Fraudulent
341	2012-11-22	2012-12-21	63	M	365667	16510280	AMPUTATION	DIABETIC GARGRENOUS FOOT	ORTH21A	RO3	368.94	359.41	728.35	Fraudulent
342	2012-11-03	2013-01-04	28	M	413850	86144989	FASCIOTOMY	SUPERFICIAL BURNS	ORTHO9A	T30.0	412.75	40.78	453.53	Legal
343	2013-01-01	2013-01-21	28	M	369874	45896728	FASCIOTOMY	BURNS	ORTHO9A	T30.0	412.75	28.7	441.45	Legal
344	2012-12-31	2013-01-04	37	M	421276	25165445	FASCIOTOMY	SUPERFICIAL BURNS	ORTHO9A	T30.0	412.75	23.7	436.45	Legal
345	2013-01-02	2013-01-21	64	F	125510	16391314	ABOVE KNEE AMPITATION		ORTHO9A	202	368.94	337	705.94	Fraudulent
346	2013-01-19	2013-01-22	1	F	420357	89406321		PREMATURITY	PAED10C	PO7.0	197.34	2.2	199.54	Legal
347	2013-01-08	2013-01-10	2	F	423491	65572542		DISLOCATION OF HIP JOINT	PAED10C		197.34	2.85	200.19	Legal
348	2013-01-15	2013-01-17	3DY	F	424869	69662849		MILD HIE	PAED10C		197.34	1.4	198.74	Legal
349	2013-01-01	2013-01-03	1DY	F	422405	65053596		MECONIUM STAINED	PAED10C		197.34	3.95	201.29	Legal
350	2013-01-11	2013-01-20	9DY	F	424041	85890604		LOW BIRTH WEIGHT	PAED10C	P07.0	197.34	2.3	199.64	Fraudulent
351	2013-01-17	2013-01-20	3	F	319714	58717350		LOW BIRTH WEIGHT	PAED10C	P07.0	197.34	3.65	200.99	Legal
352	2013-01-10	2013-01-18	15DY	F	398909	76565682		TOXIC EPIDERAL HEOROLYSIS	PAED10C		197.34	13.1	210.44	Legal
353	2013-01-22	2013-01-28	3DY	F	425561	84672096		NEONATAL JAUNDICE	PAED10C	P59.9	125.32	3.5	128.82	Legal
354	2013-01-18	2013-01-20	1DY	F	404854	85154434		THICK MECONIUM STAINED	PAED10C		197.34	2.65	199.99	Legal
355	2013-01-21	2013-01-24	1DY	F	425861	82074337		THICK MECONIUM STAINED	PAED10C		197.34	2.65	199.99	Legal
356	2013-01-10	2013-01-12	1DY	F	423660	85135930		PREMATURITY	PAED10C	P07.0	197.34	2.65	199.99	Legal
357	2013-01-27	2013-01-29	1DY	F	426191	83357114		HYPOXIC ISEHEMA	PAED12C		119.73	3.9	123.63	Legal
358	2013-01-09	2013-01-13	2DY	M	423466	81861987		SEVERE BIRTH ASPHUXIA	PAED12C		119.73	3.83	123.56	Legal
359	2013-01-03	2013-01-08	5DY	F	423364	62832961		MECONIUM STAINED	PAED12C		119.73	5.35	125.08	Legal
360	2013-01-06	2013-01-08	2DY	M	423363	83442645		MECONIUM STAINED	PAED12C		119.73	0.6	120.33	Legal
361	2012-11-10	2012-11-13	1	F	414998	62877113		MATERNAL BLOOD ASPIRATION	PAED12C		119.73	3.15	122.88	Legal
362	2012-12-22	2012-12-27	1	F	420994	87916006		SEVERE BIRTH ASPHYK	PAED12C		119.73	6.15	125.88	Legal
363	2013-01-04	2013-01-09	2	F	422831	67492893		RESPIRATERY DISTRESS	PAED13	P220	249.99	4.6	254.59	Legal
364	2012-12-31	2013-01-10	1	F	422252	82603955		NEONATAL SEPSIS	PAED14C	A41.9	202.28	2.65	204.93	Legal
365	2013-01-18	2013-01-22	2	F	422371	89592971		NEONATAI SEPSIS	PAED14C	A14.9	202.28	0.7	202.98	Legal
366	2013-01-15	2013-01-22	1	F	424436	56975613		NEONATAL SEPSIS	PAED14C	A14.9	202.28	9.3	211.58	Legal
367	2013-01-08	2013-01-10	1	F	423291	62976701		SEPSIS	PAED14C	A41.9	202.28	2.33	204.61	Legal
368	2013-01-19	2013-01-20	1	F	425065	85986330		SEVERE BIRTH ASPHUXIA	PAED14C		119.73	2.65	122.38	Legal
369	2013-01-21	2013-01-24	1	F	425908	65475446		EARLY NEONATAL SEPSIS	PAED14C	A14.9	202.28	2.65	204.93	Fraudulent
370	2013-01-21	2013-01-24	1	F	424873	82248089		stabel baby	PAED14C	A41.9	202.28	2.65	204.93	Legal
371	2013-01-21	2013-01-04	5	M	374108	37561366		BRONCHOPNEUMONIA	PAED14C	J18.9	130	84.49	214.49	Legal
372	2013-12-31	2013-01-03	2	F	422215	81567105		SIPSIS	PAED18C	A14.9	202.28	2.55	204.83	Legal
373	2013-01-18	2013-01-28	1DY	F	425048	64191292		SEVERE HYPOXIC	PAED18C	693.4	210.86	6.6	217.46	Legal
374	2013-01-20	2013-01-22	7	F	282456	64195262		SEIZURE DISORDERS	PAED20C	R56.8	104.52	14.72	119.24	Fraudulent
375	2013-01-29	2013-01-31	1	M	419018	74843003		FEBRILE CONVULSION	PAED20C	R56.8	104.52	62.5	167.02	Fraudulent
376	2013-01-12	2013-01-14	5	M	287349	63701101		SEIZURE DISORDER	PAED20C	R56.8	104.52	8.3	112.82	Fraudulent
377	2013-01-08	2013-01-14	5	M	423351	67376084		FESRIH CONVULSION	PAED20C	R556.8	104.52	17.9	122.42	Fraudulent
378	2013-01-03	2013-01-06	4	M	231189	58069693		SICKLE CELL DISEASE	PAED24C	D57.1	170.43	13.72	184.15	Fraudulent
379	2013-01-22	2013-01-27	5	F	379672	56638213		VASO-OCCLUSIVE CRISIS	PAED24C	D57.1	170.43	42.96	213.39	Fraudulent
380	2013-01-15	2013-01-17	12	F	40553	16432710		SICKLE CELL DISEASE	PAED24C	D57.1	170.43	26.89	197.32	Fraudulent
381	2012-12-25	2013-01-01	10	F	32239	16446143		SICKLE CELL DISEASE	PAED24C	D57.1	170.43	53.03	223.46	Fraudulent
382	2012-12-31	2013-01-03	9	M	416784	79348170		SICKLE CELL DISEASE	PAED24C	D57.1	170.43	30.77	201.2	Fraudulent
383	2012-12-05	2013-01-09	11	M	382786	66731078		SICKLE CELL DISEASE	PAED24C	D57.1	170.43	16.48	186.91	Fraudulent
384	29-21-2012	2013-01-02	6	M	396425	75347449		SICKLE CELL DISEASE	PAED24C	D57.1	170.43	93.72	264.15	Fraudulent
385	2013-01-09	2013-01-11	11	F	423415	65281384		SICKLE CELL DISEASE	PAED24C	D57.1	170.43	22.86	193.29	Legal
386	2013-01-17	2013-01-20	1	F	424720	83650464		SICKLE CELL DISEASE	PAED24C	D57.1	170.43	45.01	215.44	Legal
387	2012-12-31	2013-01-03	1	F	422203	67125805		NEONATAL SEPSIS	PAEDI4C	A41.9	202.28	2.55	204.83	Legal
388	2012-12-30	2013-01-03	2	F	422058	81818863		NEONATAL SEPSIS	PAEDI4C	A41.9	202.28	3.55	205.83	Legal
389	2012-12-31	2013-01-03	1	F	422233	82759285		NEONATAL SEPSIS	PAEDI4C	A41.9	202.28	2.55	204.83	Legal
390	2012-12-29	2013-01-03	5	F	422395	81457030		NEONATAL SEPSIS	PAEDI4C	A41.9	202.28	2.55	204.83	Legal
391	2013-01-03	2013-01-10	DD	F	421487	81530441		NEONATAL SEPSIS	PAEDI4C	A41.9	202.28	4.98	207.26	Legal
392	2012-12-13	2013-01-06	2	F	284228	88824803		SEVERE ACUTE MALNUTRITION	PAEDO5C	E43	98.93	12.94	111.87	Legal
393	2012-12-30	2013-01-05	8	M	422059	81726046		ANAEMIA	PAEDO6C	D51.9	155.48	26.96	182.44	Fraudulent
394	2013-01-12	2013-01-18	4	F	119243	16853970		BURNS	PSUR27C	T30.0	644.15	61.57	705.72	Legal
395	1-13-2013	1-13-2013	2	F	424063	84392113			ZOOM02C		11.48	2.33	13.81	Legal
396	1-15-2013	1-15-2013	2	F	303027	82310829			ZOOM02C		7.6	5.69	13.29	Legal
397	2013-10-01	2013-10-01	1	F	423561	81556665			ZOOM02C		11.48	16.23	27.71	Fraudulent
398	1-24-2013	1-24-2013	6	M	320568	60207068			ZOOM02C		7.6	17.98	25.58	Fraudulent
399	1-25-2013	1-25-2013	9	M	408372	87745792			ZOOM02C		7.6	14.4	22	Fraudulent
400	1-21-2013	1-21-2013	10	F	221041	16485517			ZOOM02C		7.6	4	11.6	Legal
401	2013-11-01	2013-11-01	80	F	358726	53377406			ZOOMO2A		13.03		13.03	Legal
402	2013-01-01	2013-01-01	46	M	422260	66383837			ZOOMO2A		8.66	22.3	30.96	Fraudulent
403	2013-01-01	2013-01-01	70	M	421590	86752903			ZOOMO2A		8.66	79.82	88.48	Fraudulent
404	2013-07-01	2013-07-01	35	F	416192	82057154			ZOOMO2A		8.66	0.18	8.84	Legal
405	2013-07-01	2013-07-01	80	F	423066	16418410			ZOOMO2A		8.66		8.66	Legal
406	2013-06-01	2013-06-01	42	M	423057	75939480			ZOOMO2A		8.66		8.66	Legal
407	1-22-2013	1-22-2013	17	M	425458	52923500			ZOOMO2A		8.66	9.3	17.96	Legal
408	1-22-2013	1-22-2013	23	F	425509	65571904			ZOOMO2A		8.66	26.64	35.3	Fraudulent
409	1-21-2013	1-21-2013	12	M	425411	69630578			ZOOMO2A		8.66	1.7	10.36	Legal
410	1-20-2013	1-20-2013	47	F	357797	66664624			ZOOMO2A		8.66		8.66	Legal
411	1-20-2013	1-20-2013	42	F	425223	16488906			ZOOMO2A		8.66	5.9	14.56	Legal
412	1-20-2013	1-20-2013	21	F	425194	83473293			ZOOMO2A		8.66	17.8	26.46	Fraudulent
413	1-20-2013	1-20-2013	19	F	425246	68478760			ZOOMO2A		8.66	4.56	13.22	Legal
414	2013-01-04	2013-01-07	6	F	422997	73282486		SEVERE MALARIA	PAED37C	B50.9	106.21	10.79	117	Fraudulent
415	2013-01-05	2013-01-07	3	M	402110	89644684		MALARIA COMPLICATED	PAED37C	B50.9	106.21	5.5	111.71	Fraudulent
416	2013-01-12	2013-01-14	8	F	423960	89327646		MALARIA COMPLICATED	PAED37C	B50.9	106.21	6.4	112.61	Fraudulent
417	2013-01-12	2013-01-14	10	F	423952	66612572		SEVERE MALARIA	PAED37C	B50.9	106.21	33.31	139.52	Fraudulent
418	2013-01-23	2013-01-25	10	F	271124	52923419		MALARIA COMPLICATED	PAED37C	B50.9	106.21	9.78	115.99	Fraudulent
419	2013-01-17	2013-01-27	8	M	422059	81726046		SEVERE MALARIA	PAED37C	B50.9	106.21	42.37	148.58	Fraudulent
420	2013-01-23	2013-01-27	2	M	290462	63316237		SEVERE MALARIA	PAED37C	B50.9	106.21	17.23	123.44	Fraudulent
421	2013-01-25	2013-01-27	1	M	425943	85211588		BRONCHOPNEUMONIA	PAED37C	J18.9	130	7	137	Fraudulent
422	2013-01-01	2013-01-03	1	F	422533	83263638		LATE PRETERM	PAED37C		197.34	0.06	197.4	Fraudulent
423	2012-11-25	2012-11-29	1	M	416954	78745332		MALARIA	PAED37C	B50.9	137.67	27.91	165.58	Fraudulent
424	2013-01-01	2013-01-04	4	M	422339	66621348		PNEUMONIA	PAED38C	M8.9	130	26.5	156.5	Fraudulent
425	2012-12-29	2013-01-01	1	M	411307	87299954		MALARIA	PAED38C		130	7	137	Fraudulent
426	2013-01-08	2013-01-11	7	M	370625	16412245		MALARIA COMPLICATED	PAED38C	A41.9	130	39.47	169.47	Fraudulent
427	2013-01-07	2013-01-14	1	M	423244	74124807		MENINGITIS	PAED38C	G03.9	130	33.15	163.15	Fraudulent
428	2013-01-08	2013-01-11	3	M	423364	81923783		ACUTE INFECTION ENDOAR	PAED38C	I33.0	130	48.4	178.4	Fraudulent
429	2013-01-09	2013-01-09	28	F	421891	52846454			OPDC02A	80.9	13.27	0.72	13.99	Legal
430	2013-01-09	2013-01-09	30	F	412309	62129981			OPDC02A	80.9	13.27	0.72	13.99	Legal
431	2013-01-09	2013-01-09	36	F	408308	66910008			OPDC02A	80.9	13.27	0.72	13.99	Legal
432	2013-01-09	2013-01-09	29	F	357786	73229037			OPDC02A	80.9	13.27	0.36	13.63	Legal
433	2013-01-09	2013-01-09	26	F	407023	85944720			OPDC02A	80.9	13.27	0.72	13.99	Legal
434	2013-01-09	2013-01-09	34	F	417561	88871760			OPDC02A	80.9	13.27	0.66	13.93	Legal
435	2013-01-09	2013-01-09	32	F	146517	16371214			OPDC02A	80.9	13.27	0.86	14.13	Legal
436	2013-01-09	2013-01-09	24	F	418707	87910017			OPDC02A	80.9	13.27	0.36	13.63	Legal
437	2013-01-09	2013-01-09	25	F	408222	86639219			OPDC02A	80.9	13.27	0.72	13.99	Legal
438	2013-01-09	2013-01-09	33	F	420925	83208939			OPDC02A	80.9	13.27	0.12	13.39	Legal
439	2013-01-09	2013-01-09	28	F	213631	49454346			OPDC02A	80.9	13.27	0.72	13.99	Fraudulent
440	2013-01-09	2013-01-09	25	F	404807	28519462			OPDC02A	80.9	13.27	0.72	13.99	Legal
441	2013-01-09	2013-01-09	31	F	370379	81884053			OPDC02A	80.9	13.27	0.72	13.99	Legal
442	2013-01-09	2013-01-09	31	F	421895	36996542			OPDC02A	80.9	13.27	0.06	13.33	Legal
443	2013-01-09	2013-01-09	34	F	401370	89337720			OPDC02A	80.9	13.27	0.72	13.99	Legal
444	2013-01-09	2013-01-09	32	F	260082	16470534			OPDC02A	80.9	13.27	0.72	13.99	Legal
445	2013-01-09	2013-01-09	31	F	393036	80431689			OPDC02A	80.9	13.27	1.7	14.97	Legal
446	2013-01-09	2013-01-09	30	F	415819	88695834			OPDC02A	80.9	13.27	33.6	46.87	Fraudulent
447	2013-01-09	2013-01-09	37	F	266897	44173886			OPDC02A	80.9	13.27	13.86	27.13	Fraudulent
448	2013-01-09	2013-01-09	38	F	406804	58810071			OPDC02A	80.9	13.27	34.32	47.59	Fraudulent
449	2013-01-09	2013-01-09	32	F	211871	0 012702			OPDC02A	80.9	13.27	0.26	13.53	Legal
450	2013-01-09	2013-01-09	29	F	394111	18130651			OPDC02A	80.9	13.27	0.92	14.19	Legal
451	2013-01-09	2013-01-09	27	F	407719	87466827			OPDC02A	80.9	13.27	0.72	13.99	Legal
452	2013-01-09	2013-01-09	32	F	158885	89608978			OPDC02A	80.9	13.27	0.72	13.99	Legal
453	2013-01-09	2013-01-09	34	F	422860	62725628			OPDC02A	80.9	13.27	0.72	13.99	Legal
454	2013-01-09	2013-01-09	28	F	415812	59798966			OPDC02A	80.9	13.27	0.66	13.93	Legal
455	1-15-2013	1-15-2013	18	M	424404	79479949			ZOOMO2A		8.66	7.8	16.46	Legal
456	1-19-2013	1-19-2013	81	M	301207	60869024			ZOOMO2A		8.66	39.2	47.86	Fraudulent
457	1-22-2013	1-22-2013	28	M	417673	72419594			ZOOMO2A		13.03	16.9	29.93	Fraudulent
458	1-29-2013	1-29-2013	55	F	426208	74256639			ZOOMO2A		8.66	22.8	31.46	Fraudulent
459	1-28-2013	1-28-2013	66	F	426358	45162086			ZOOMO2A		8.66	11.6	20.26	Fraudulent
460	2013-02-01	2013-02-01	2	F	422285	16465609			ZOOMO2C		7.6	11.75	19.35	Fraudulent
461	1-22-2013	1-22-2013	7	M	425434	61199776			ZOOMO2C		7.6	36.91	44.51	Fraudulent
462	1-19-2013	1-19-2013	2	F	424984	83001893			ZOOMO2C		7.6	13	20.6	Fraudulent
463	1-19-2013	1-19-2013	9	M	425146	78315747			ZOOMO2C		7.6	9.6	17.2	Fraudulent
464	1-18-2013	1-18-2013	1	F	424689	82361224			ZOOMO2C		11.48	9.94	21.42	Fraudulent
465	1-19-2013	1-19-2013	9	M	267199	16462157			ZOOMO2C		7.6	7.8	15.4	Legal
466	2013-01-02	2013-01-04	8	F	215146	16420437		ACUTE ASTHMATIC ALTUELE	PAED30C	I45.9	68.9	16.24	85.14	Legal
467	2013-01-12	2013-01-14	1	M	410816	78896228		VIRAL GASTROENTERITIS	PAED31C	A0.9	96.98	10.31	107.29	Legal
468	2013-01-13	2013-01-15	3	F	424061	64336360		GASTROEUTETY	PAED31C	A09	96.98	2.33	99.31	Legal
469	2012-12-31	2013-01-02	2	M	347226	65456193		MALARIA	PAED36C	B54	32.24	12.7	44.94	Legal
470	2013-01-17	2013-01-19	2	M	424916	85435103		MALARIA	PAED36C	B64	32.24	21	53.24	Legal
471	2013-01-04	2013-01-07	6	F	422997	73282486		SEVERE MALARIA	PAED37C	B50.9	106.21	10.79	117	Fraudulent
472	2013-01-05	2013-01-07	3	M	402110	89644684		MALARIA COMPLICATED	PAED37C	B50.9	106.21	5.5	111.71	Fraudulent
473	2013-01-12	2013-01-14	8	F	423960	89327646		MALARIA COMPLICATED	PAED37C	B50.9	106.21	6.4	112.61	Fraudulent
474	2013-01-12	2013-01-14	10	F	423952	66612572		SEVERE MALARIA	PAED37C	B50.9	106.21	33.31	139.52	Fraudulent
475	2013-01-23	2013-01-25	10	F	271124	52923419		MALARIA COMPLICATED	PAED37C	B50.9	106.21	9.78	115.99	Fraudulent
476	2013-01-17	2013-01-27	8	M	422059	81726046		SEVERE MALARIA	PAED37C	B50.9	106.21	42.37	148.58	Fraudulent
477	2013-01-23	2013-01-27	2	M	290462	63316237		SEVERE MALARIA	PAED37C	B50.9	106.21	17.23	123.44	Fraudulent
478	2013-01-25	2013-01-27	1	M	425943	85211588		BRONCHOPNEUMONIA	PAED37C	J18.9	130	7	137	Fraudulent
479	2013-01-01	2013-01-03	1	F	422533	83263638		LATE PRETERM	PAED37C		197.34	0.06	197.4	Fraudulent
480	2012-11-25	2012-11-29	1	M	416954	78745332		MALARIA	PAED37C	B50.9	137.67	27.91	165.58	Fraudulent
481	2013-01-01	2013-01-04	4	M	422339	66621348		PNEUMONIA	PAED38C	M8.9	130	26.5	156.5	Fraudulent
482	2012-12-29	2013-01-01	1	M	411307	87299954		MALARIA	PAED38C		130	7	137	Fraudulent
483	2013-01-08	2013-01-11	7	M	370625	16412245		MALARIA COMPLICATED	PAED38C	A41.9	130	39.47	169.47	Fraudulent
484	2013-01-07	2013-01-14	1	M	423244	74124807		MENINGITIS	PAED38C	G03.9	130	33.15	163.15	Fraudulent
485	2013-01-08	2013-01-11	3	M	423364	81923783		ACUTE INFECTION ENDOAR	PAED38C	I33.0	130	48.4	178.4	Fraudulent
486	2013-01-08	2013-01-20	11	F	422801	89084073		BRONCHOPNEUMONIA	PAED38C	J18.9	130	38.8	168.8	Legal
487	2013-01-09	2013-01-13	7	M	423532	84001315		SEPSIS	PAED38C	A41.9	130	26.26	156.26	Legal
488	2013-01-03	2013-01-07	1	F	422543	89597618		BRONCHOPNEUMONIA	PAED38C	J18.9	197.6	4.86	202.46	Legal
489	2013-01-14	2013-01-19	2	F	422054	57109267		BRONCHOPNEUMONIA	PAED38C	J18.9	197.6	8.9	206.5	Legal
490	2013-01-20	2013-01-22	7	F	282456	64195262		SEIZURE DISORDERS	PAED20C	R56.8	104.52	14.72	119.24	Fraudulent
491	2013-01-29	2013-01-31	1	M	419018	74843003		FEBRILE CONVULSION	PAED20C	R56.8	104.52	62.5	167.02	Fraudulent
492	2013-01-12	2013-01-14	5	M	287349	63701101		SEIZURE DISORDER	PAED20C	R56.8	104.52	8.3	112.82	Fraudulent
493	2013-01-08	2013-01-14	5	M	423351	67376084		FESRIH CONVULSION	PAED20C	R556.8	104.52	17.9	122.42	Fraudulent
494	2013-01-03	2013-01-06	4	M	231189	58069693		SICKLE CELL DISEASE	PAED24C	D57.1	170.43	13.72	184.15	Fraudulent
495	2013-01-22	2013-01-27	5	F	379672	56638213		VASO-OCCLUSIVE CRISIS	PAED24C	D57.1	170.43	42.96	213.39	Fraudulent
496	2013-01-15	2013-01-17	12	F	40553	16432710		SICKLE CELL DISEASE	PAED24C	D57.1	170.43	26.89	197.32	Fraudulent
497	2012-12-25	2013-01-01	10	F	32239	16446143		SICKLE CELL DISEASE	PAED24C	D57.1	170.43	53.03	223.46	Fraudulent
498	2012-12-31	2013-01-03	9	M	416784	79348170		SICKLE CELL DISEASE	PAED24C	D57.1	170.43	30.77	201.2	Fraudulent
499	2012-12-05	2013-01-09	11	M	382786	66731078		SICKLE CELL DISEASE	PAED24C	D57.1	170.43	16.48	186.91	Fraudulent
500	2013-01-22	2013-01-25	5	M	425519	87283706		SKIN DISEASE	PAED26C	I23.9	171.6	16.3	187.9	Legal
501	2012-11-22	2012-12-20	37	M	410390	78739282	INCISION DAMAGE&DEBRIDEMENT	DIABETIC FOOT(RT)	ASUR31A	T.73.9	141.44	258.34	399.78	Fraudulent
502	2012-12-25	2012-12-31	22	F	421455	66989440	LAPAROLONY	ABDOMIAL TRIRY 2 FRAUMA	ASUR08A	T14.0	332.02	91.2	423.22	Legal
503	2013-01-21	2013-01-28	38	F	46489	63313932	THYRIODECTOMY	TOXIC MULTINODULER GOITRE	ASUR01A	D44.0	339.04	71.38	410.42	Legal
504	2013-01-03	2013-01-08	21	F	69363	16437273	APPENCEMTOMY	ACUTE APPENDCSTIS	ASUR08A	K37.7	332.02	132.2	464.22	Legal
505	2013-01-03	2013-01-11	32	F	270830	16369104	LAPAROTOMY	APPENDICITIS	ASUR08A	K37.7	332.02	110.05	442.07	Legal
506	2013-01-04	2013-01-14	32	F	422671	71258176	LAPAROTOMY	APPENDICITIS	ASUR08A	K37.7	332.02	213.1	545.12	Fraudulent
507	2013-01-16	2013-01-25	38	M	424538	89745566	LAPAROTOMY	PERITONITIS	ASUR08A	K65.9	332.02	78.84	410.86	Legal
508	2013-01-06	2013-01-11	14	M	423000	47979145	APPENCEMTOMY	ACUTE APPENDCSTIS	ASUR08A	K37.7	332.02	39.5	371.52	Legal
509	2013-12-30	2013-01-02	39	M	422066	16422413	APPENCEMTOMY	APPENDICITIS	ASUR08A	K37.7	332.02	39.7	371.72	Legal
510	2013-01-12	2013-01-25	52	F	62002	55060951	APPENCEMTOMY	APPENDICITIS	ASUR08A	K37.7	332.02	74.04	406.06	Legal
511	2013-01-14	2013-01-16	15	M	424033	61273367	APPENCEMTOMY	APPENDICITIS	ASUR08A	K37.7	332.02	101.74	433.76	Legal
512	2013-01-09	2013-01-11	26	F	422659	71979225		PERFIRATION	ASUR09A	A01.0	64.09	46.24	110.33	Legal
513	2013-01-18	2013-01-22	49	M	228713	16467451		ACUTE EPIDIDYMO	ASUR09A		64.09	29.04	93.13	Legal
514	2013-01-20	2013-01-23	69	M	425175	77858288		VARICEAL BLEEDING	ASUR09A	I85.9	64.09	13.74	77.83	Legal
515	2013-01-03	2013-01-06	34	M	420296	85334094	HERNIA REPAIR HYDROCELECTOMY	MESENTERIC HERNIA	ASUR19A	R46.9	267.8	57.95	325.75	Legal
516	2013-01-08	2013-01-10	18	F	423260	69264801	HERMORRHAPHY	STRANGULATED FERNORAL HERNIA	ASUR19A	K46.9	267.8	48.34	316.14	Legal
517	2013-01-03	2013-01-09	48	F	423109	16429713	HERMORRHAPHY	PARAUMBILICAL	ASUR20A	K42.9	144.82	63.22	208.04	Legal
518	2013-01-29	2013-01-31	80	M	422093	79413422	HERNMORRAPHY	RIGHT HIGUNIAL HERNIPLAPHY	ASUR20A	K40.9	144.82	71.14	215.96	Legal
519	2013-01-21	2013-01-25	78	M	421333	17073387	HERMORRHAPHY	INGMINAL HERNIA	ASUR20A	K40.9	144.82	33.3	178.12	Legal
520	2013-01-03	2013-01-21	68	M	141891	26922133	PROSTATESTOMY	BENING PROSTATIC HYPERTROPHY	ASUR21A	N40	478.14	76.8	554.94	Legal
521	2013-01-20	2013-01-25	58	M	425185	82879407	SURGERY ON SCROTUM	TORSION OF TESTIS	ASUR22A	N44	126.1	59.54	185.64	Legal
522	2013-01-03	2013-01-11	50	M	18919	16370459	INCISUN AND DRIANAGE	PALMER ABSCESS	ASUR31A	L02.9	141.44	160.24	301.68	Fraudulent
523	2013-01-08	2013-01-19	35	F	423402	60381032	DEBRIDEMRNT	SEPTIC WOUND	ASUR31A	T79.30	141.44	356.4	497.84	Fraudulent
524	2013-02-01	2013-02-01	42	M	420750	58454715	EXTRACTION	CAVIES	DENT01A		15.47	1.5	16.97	Legal
525	1-14-2013	1-14-2013	68	F	0174-12	89210371	EXTRACTION	PERIODONTITIS	DENT01A		15.47	1.5	16.97	Legal
526	1-14-2013	1-14-2013	22	M	0189-13	37344100	ANTIBIATIC	APICAL PERIODONTITIS	DENT01A		15.47	1.5	16.97	Legal
527	1-14-2013	1-14-2013	48	F	3721-11	16420425	EXTRACTION	APICAL PERIODONTITIS	DENT01A		15.47	1.5	16.97	Legal
528	1-14-2013	1-14-2013	58	F	0177-13	68013739	EXTRACTION	APICAL PERIODONTITIS	DENT01A		15.47	5.42	20.89	Legal
529	1-14-2013	1-14-2013	54	F	3587-11	10133465	EXTRACTION	APICAL PERIODONTITIS	DENT01A		15.47	1.5	16.97	Legal
530	1-14-2013	1-14-2013	12	F	4122-12	15553534	EXTRACTION	CARIES	DENT01A		14.95	0.9	15.85	Legal
531	2013-07-01	2013-07-01	39	M	0076-12	68547278	EXTRACTION	PERIODONTITIS	DENT01A		15.47	5.42	20.89	Legal
532	2013-07-01	2013-07-01	81	M	3842-12	15605606	EXTRACTION	PERIODONTITIS	DENT01A		15.47	1.5	16.97	Legal
533	2013-10-01	2013-10-01	19	M	91113	16519546	EXTRACTION	CARIES	DENT01A		15.47	1.5	16.97	Legal
534	2013-09-01	2013-09-01	9	M	0124-13	16397879	EXTRACTION	CARIES	DENT01A		14.95	13.48	28.43	Fraudulent
535	2013-09-01	2013-09-01	27	F	0036-13	16472866	EXTRACTION	CARIES	DENT01A		15.47	1.5	16.97	Legal
536	1-18-2013	1-18-2013	54	M		52816434			INVES58D		12.09		12.09	Fraudulent
537	1-16-2013	1-16-2013	67	F		56694726			INVES58D		12.09		12.09	Fraudulent
538	1-16-2013	1-16-2013	68	F		15584735			INVES58D		12.09		12.09	Fraudulent
539	1-16-2013	1-16-2013	17	M		67132608			INVES58D		12.09		12.09	Fraudulent
540	2013-09-01	2013-09-01	36	F		48641475			INVES58D		12.09		12.09	Fraudulent
541	2013-07-01	2013-07-01	63	M		16511337			INVES58D		12.09		12.09	Fraudulent
542	2013-04-01	2013-04-01	59	F		16393830			INVES75D		7.28		7.28	Fraudulent
543	2013-02-01	2013-02-01	22	M		62689854			INVES75D		7.28		7.28	Fraudulent
544	2013-03-01	2013-03-01	58	F		63056129			INVES75D		7.28		7.28	Fraudulent
545	2013-04-01	2013-04-01	63	F		16444597			INVES75D		7.28		7.28	Fraudulent
546	1-15-2013	1-15-2013	63	F		16451103			INVES75D		7.28		7.28	Fraudulent
547	1-24-2013	1-24-2013	73	M		16439445			INVES75D		7.28		7.28	Fraudulent
548	1-22-2013	1-22-2013	54	F		53546959			INVES75D		7.28		7.28	Fraudulent
549	1-21-2013	1-21-2013	51	M		16512118			INVES75D		7.28		7.28	Fraudulent
550	1-22-2013	1-22-2013	50	M		67923809			INVES75D		7.28		7.28	Fraudulent
551	2013-02-01	2013-02-01	71	F		85965128			INVES89D		12.09		12.09	Fraudulent
552	2013-02-01	2013-02-01	57	F		61935875			INVES89D		12.09		12.09	Fraudulent
553	2013-08-01	2013-08-01	49	F		48431100			INVES89D		12.09		12.09	Fraudulent
554	2013-08-01	2013-08-01	69	M		67654684			INVES89D		12.09		12.09	Fraudulent
555	2013-04-01	2013-04-01	60	F		85372758			INVES89D		12.09		12.09	Fraudulent
556	2013-04-01	2013-04-01	39	M		80765363			INVES89D		12.09		12.09	Fraudulent
557	2013-04-01	2013-04-01	64	F		47607044			INVES89D		12.09		12.09	Fraudulent
558	1-23-2013	1-26-2013	87	F	129085	16423899		HYPERGLYCAEMIA	MED102A	E14	190.45	44.05	234.5	Fraudulent
559	1-15-2013	1-22-2013	51	M	416597	78535114		HYPERGLYCAEMIA	MED103A	E87.0	190.45	61.5	251.95	Legal
560	1-20-2013	1-23-2013	75	M	422968	61308950		ANAEMIA	MED106A	D50.9	128.83	5.8	134.63	Legal
561	1-25-2013	1-28-2013	33	F	269866	67135672		S. ANAEMIA	MED106A	D51.9	128.83	32.86	161.69	Legal
562	1-27-2013	1-29-2013	35	F	426150	71602244		SEIZURE ATTACK	MED112A	G41.9	104.78	17.6	122.38	Legal
563	1-15-2013	1-24-2013	34	M	424356	39203332		C. ACCIDENT	MED114A	I64	128.18	17.86	146.04	Legal
564	1-24-2013	1-27-2013	15	F	58438	16391446		VASOCLUSIVE CRISIS IN SICKLE CELL DISEASE	MED116A	D57.1	123.11	58.8	181.91	Fraudulent
565	1-13-2013	1-22-2013	20	F	30070	16493692		SICKLE CELL DISEASE WITH VOC	MED116A	D57.1	123.11	85.12	208.23	Fraudulent
566	1-25-2013	1-27-2013	75	F	426022	75246648		ACUTE WATERY DIARH.	MED123A	A09	88.92	18.7	107.62	Legal
567	1-28-2013	1-31-2013	47	F	426124	66799749		ACUTE GASTRO-E.	MED123A	A09	88.92	26.82	115.74	Legal
568	1-27-2013	1-30-2013	45	F	426182	58069345		ACUTE GASTRO-E.	MED123A	A09	88.92	14.56	103.48	Legal
569	1-19-2013	1-26-2013	47	M	412435	79536767		PNEUMONIA	MED130A	J18.9	148.46	120.74	269.2	Legal
570	1-22-2013	1-26-2013	46	F	425469	87236206		PNEUMONIA	MED130A	J18.9	148.46	118.58	267.04	Legal
571	1-22-2013	1-25-2013	7	M	381667	68430832		CELLULITIS OF BOTH LEGS	MED131A	L03.9	63.96	96.4	160.36	Fraudulent
572	1-22-2013	1-29-2013	76	F	392335	16456322		HYPERGLYCAEMIA	MED132A	I10	90.22	221.05	311.27	Fraudulent
573	1-18-2013	1-22-2013	56	M	424953	16506601		DEEP VEIN THROMLOSIS	MED134A	I82.9	133.64	128.1	261.74	Fraudulent
574	1-15-2013	1-23-2013	67	M	310974	65039702		DEEP VEIN THROMLOSIS	MED134A	I82.9	133.64	18.6	152.24	Legal
575	2012-08-12	2013-12-01	66	M	419017	88731803		DEEP VEIN THROMLOSIS	MED134A	I82.9	133.64	585.22	718.86	Fraudulent
576	1-14-2013	1-31-2013	37	M	424269	88112969		RETROVIRAL INFECTION WITH ENCEPHALO	MED138A		158.47	13.95	172.42	Legal
577	2013-03-01	1-13-2013	35	M	420836	76515474		RETROVIRAL INFECTION WITH ENCEPHALO	MED138A		158.47	18.78	177.25	Legal
578	2012-12-14	2012-12-26	44	F	419854	16358598		CELLULITIS R. LEG	MEDI 03A	E14	190.45	369.22	559.67	Fraudulent
579	2012-12-19	2012-12-24	26	M	397987	87239372		HYPERGLYCEMIA	MEDI 03A	E87	190.45	41.98	232.43	Legal
580	2013-01-21	2013-01-24	52	F	414369	78680773		THYRPTOXICOSIS/GOITRE	MEDIO1A	EO4.9	119.86	11.12	130.98	Legal
581	2012-12-28	2013-01-05	82	F	102083	16351075		DIABETIES MELLITUS COM	MEDIO3A	E14.0	190.45	152.24	342.69	Fraudulent
582	2012-12-16	2012-12-24	60	F	158805	16506625		DIABETES MELITU TYPEII	MEDIO3A	E14	190.45	447.76	638.21	Fraudulent
583	2012-12-31	2013-01-05	61	F	420534	44704193		ANAEMIA	MEDIO6A	D57.9	128.83	12.36	141.19	Legal
584	2012-12-23	2012-12-28	67	M	176737	16381336		CONGESTIVE CARDIAC FAILURE	MEDIO7A	I50.9	155.87	15.26	171.13	Legal
585	2012-12-26	2013-01-05	29	F	421537	16360552	GYNAELOGICAL LAPAROTOMY	ECTOPIC GESTATION	OBGY01A	OOO9	292.5	114.08	406.58	Fraudulent
586	2012-12-23	2013-01-01	44	F	420781	23806105	GYNAELOGICAL LAPAROTOMY	ECTOPIC GESTATION	OBGY01A	OOO9	292.5	127.64	420.14	Fraudulent
587	2013-01-07	2013-01-11	42	F	417431	79036723	LAPONOTOMY	OVARIAN CYST	OBGY01A	D27	292.5	94.36	386.86	Fraudulent
588	2013-01-30	2013-01-31	21	F	419881	58166188	SALPINGECTOMY	LEAKING RT ECTOPIC	OBGY01A	OOO9	292.5	101.76	394.26	Fraudulent
589	2012-12-30	2013-01-31	27	F	422004	65572086	LAPORATOMT	RUPTURED ECTOPIC GESTATION	OBGY01A	OOO9	292.5	89.22	381.72	Fraudulent
590	2013-01-18	2013-01-28	36	F	425003	82419434	GYNAECOLOGICAL LAPAROTOMY	RUPTURED EDEMIC PREGNANCY	OBGY01A	OO0.9	292.5	94.92	387.42	Fraudulent
591	2013-01-03	2013-01-26	25	F	336305	55916924	LAPAROTOMY	RETAINED PRODUCT	OBGY01A	OO8.9	292.5	225.78	518.28	Fraudulent
592	2013-01-19	2013-01-24	12	F	425144	32058208	LAPAROTOMY	ECTOPIC PREGNANCY	OBGY01A	OOO.6	292.5	74.92	367.42	Fraudulent
593	2012-12-25	2012-12-31	62	F	420232	40419835	LAPAROTOMY	ENDOMETRIOSIS	OBGY01A	480.9	292.5	73.24	365.74	Fraudulent
594	2012-12-28	2012-12-31	29	F	421650	19597974	GYNAEOLOGICAL LAPARATOMY		OBGY01A	OOO.9	292.5	63.93	356.43	Legal
595	2012-12-28	2012-12-31	29	F	421710	16474159	LAPORATORY	RUPTARED ECTOPIC	OBGY01A	OOO.9	292.5	75.08	367.58	Fraudulent
596	2012-12-21	2012-12-28	30	F	420785	89369383	GYNAEOLOGICAL LAPARATOMY	LEAKING ECTOPIC GESTATION	OBGY01A		292.5	75.34	367.84	Fraudulent
597	2013-01-24	2013-01-27	26	F	425913	69022350		CHRONIC PELVIC PANI	OBGY02A	N.73.9	155.61	5.34	160.95	Legal
598	2013-01-25	2013-01-26	26	F	426043	52957608		PELVIC INFLAMATORY DISEASE	OBGY02A	N.73.9	155.61	12.7	168.31	Legal
599	2013-01-09	2013-01-13	37	F	395728	60865750	CULDOTOMY	PELVIC INFLAMMATORY	OBGY04A	N73.9	78.39	100.18	178.57	Fraudulent
600	2013-01-18	2013-01-24	20	F	425063	70181051	CULDOCENTESIS	PELVIC INFLAMATORY DISEASE	OBGY04A	N.73.9	78.39	117.58	195.97	Fraudulent
601	2012-12-30	2013-01-01	31	F	422087	86706843	E.O.U	THREATENED ABORTION	OBGY06A	OO6	72.8	8.96	81.76	Legal
602	2012-12-31	2013-01-01	20	F	422102	20048764	E.O.U	INCOMPLETE ABORTION	OBGY06A	OO6	72.8	19.3	92.1	Legal
603	2013-01-02	2013-01-04	38	F	386261	19583516	E.O.U	INCOMPLETE ABORTION	OBGY06A	OO6	72.8	11.8	84.6	Legal
604	2013-01-01	2013-01-04	32	F	422354	62017432	E.O.U	INCOMPLETE ABORTION	OBGY06A	OO6	72.8	25.4	98.2	Legal
605	2013-01-02	2013-01-04	27	F	422274	86226432	E.O.U	INCOMPLETE ABORTION	OBGY06A	OO6	72.8	10.6	83.4	Legal
606	2013-01-03	2013-01-05	32	F	420965	80471444	E.O.U	INCOMPLETE ABORTION	OBGY06A	OO6	72.8	13	85.8	Legal
607	2013-01-11	2013-01-13	29	F	212709	19586556	E.O.U	BLIGHTED OVUM	OBGY06A	OO6	72.8	54.1	126.9	Fraudulent
608	2013-01-03	2013-01-06	33	F	419020	37904830	E.O.U	INCOMPLETED ABORTION	OBGY06A	OO6	72.8	109.88	182.68	Fraudulent
609	2013-01-11	2013-01-14	38	F	390132	24730050	E.O.U	BLIGHTED OVUM	OBGY06A	OO6	72.8	15.98	88.78	Legal
610	2013-01-09	2013-01-11	40	F	398581	16511958	E.O.U	INCOMPLETE ABORTION	OBGY06A	OO6	72.8	49.88	122.68	Fraudulent
611	2013-01-07	2013-01-10	23	F	423083	61458505	E.O.U	INCOMPLETE ABORTION	OBGY06A	OO6	72.8	19.02	91.82	Legal
612	2013-01-14	2013-01-15	22	F	418685	88009623	SPONTANEOUS VAGINAL DELIVERY	DELIVERY	OBGY33A	80.9	50.96	2	52.96	Legal
613	2013-01-14	2013-01-15	25	F	419441	62149275	SPONTANEOUS VAGINAL DELIVERY	DELIVERY	OBGY33A	80.9	50.96	2	52.96	Legal
614	2013-01-16	2013-01-17	21	F	421847	82825938	SPONTANEOUS VAGINAL DELIVERY	DELIVERY	OBGY33A	80.9	50.96	3	53.96	Legal
615	2013-01-16	2013-01-16	36	F	418962	84217268	SPONTANEOUS VAGINAL DELIVERY	DELIVERY	OBGY33A	80.9	50.96	6	56.96	Legal
616	2013-01-16	2013-01-16	46	F	303334	46126408	SPONTANEOUS VAGINAL DELIVERY	DELIVERY	OBGY33A	80.9	50.96	8	58.96	Legal
617	2013-01-15	2013-01-16	23	F	423101	78076172	SPONTANEOUS VAGINAL DELIVERY	DELIVERY	OBGY33A	80.9	50.96	8	58.96	Legal
618	2013-01-16	2013-01-17	33	F	424668	81814599	SPONTANEOUS VAGINAL DELIVERY	DELIVERY	OBGY33A	80.9	50.96	4.2	55.16	Legal
619	2013-01-30	2013-01-30	30	F	390432	78183734			OPDC02A	80.9	13.27		13.27	Legal
620	2013-01-30	2013-01-30	28	F	423870	90193809			OPDC02A	80.9	13.27		13.27	Legal
621	2012-12-21	2012-12-21	33	F	0 27300	62616561			OPDC02A	80.9	13.27		13.27	Legal
622	1-14-2013	1-14-2013	16	F	0176-13	16412963	ANTIBIATIC	APICAL PERIODONTITIS	OPDC03A		4.88	1.5	6.38	Legal
623	1-14-2013	1-14-2013	57	M	0187-12	84473657	ANTIBIATIC	APICAL PERIODONTITIS	OPDC03A		4.88	1.5	6.38	Legal
624	1-14-2013	1-14-2013	48	F	1903-11	16539191	CARIES	APICAL PERIODONTITIS	OPDC03A		4.88	1.5	6.38	Legal
625	1-14-2013	1-14-2013	32	M	0171-13	65643315	ANTIBIATIC	APICAL PERIODONTITIS	OPDC03A		4.88	1.5	6.38	Legal
626	1-14-2013	1-14-2013	37	F	3543-12	66064338	ANTIBIATIC	APICAL PERIODONTITIS	OPDC03A		4.88	1.5	6.38	Legal
627	1-14-2013	1-14-2013	44	F	1145-12	16417498	ANTIBIATIC	APICAL PERIODONTITIS	OPDC03A		4.88	1.5	6.38	Legal
628	1-14-2013	1-14-2013	6	F	0178-12	16440432	ANTIBIATIC	CARIES	OPDC03A		4.88	2.3	7.18	Legal
629	1-14-2013	1-14-2013	54	F	0173-12	16472233	ANTIBIATIC	APICAL PERIODONTITIS	OPDC03A		4.88	15.96	20.84	Fraudulent
630	2013-02-01	2013-02-01	70	M	6020-12	1652590	ANTIBIATIC	APICAL PERIODONTITIS	OPDC03A		4.88	1.5	6.38	Legal
631	2013-02-01	2013-02-01	27	M	0013-13	74081926	ANTIBIATIC	PERIODONTITIS	OPDC03A		4.88	14.3	19.18	Fraudulent
632	2013-02-01	2013-02-01	29	F	0014-13	16358559	ANTIBIATIC	CARIES	OPDC03A		4.88	1.5	6.38	Legal
633	2013-02-01	2013-02-01	62	M	0022-13	69952060	ANTIBIATIC	CARIES	OPDC03A		4.88	1.5	6.38	Legal
634	2013-02-01	2013-02-01	28	M	0009-12	76592382	ANTIBIATIC	CARIES	OPDC03A		4.88	1.5	6.38	Legal
635	1-14-2013	1-14-2013	27	M	0010-13	66621249	ANTIBIATIC	CARIES	OPDC03A		4.88	1.5	6.38	Legal
636	2013-04-01	2013-04-01	4	F	0054-13	85299862	ANTIBIATIC	CARIES	OPDC03A		4.88	8	12.88	Fraudulent
637	2013-04-01	2013-04-01	5	M	0081-13	81878067	ANTIBIATIC	CARIES	OPDC03A		4.88	8	12.88	Fraudulent
638	2013-01-31	2013-01-31	39	F	418692	16516670			OPDC02A	80.9	13.27		13.27	Legal
639	2013-01-23	2013-01-23	20	F	421887	89947056			OPDC02A	80.9	13.27		13.27	Legal
640	2012-12-21	2012-12-21	33	F	0 27300	62616561			OPDC02A	80.9	13.27		13.27	Legal
641	1-14-2013	1-14-2013	16	F	0176-13	16412963	ANTIBIATIC	APICAL PERIODONTITIS	OPDC03A		4.88	1.5	6.38	Legal
642	1-14-2013	1-14-2013	57	M	0187-12	84473657	ANTIBIATIC	APICAL PERIODONTITIS	OPDC03A		4.88	1.5	6.38	Legal
643	1-14-2013	1-14-2013	48	F	1903-11	16539191	CARIES	APICAL PERIODONTITIS	OPDC03A		4.88	1.5	6.38	Legal
644	1-14-2013	1-14-2013	32	M	0171-13	65643315	ANTIBIATIC	APICAL PERIODONTITIS	OPDC03A		4.88	1.5	6.38	Legal
645	1-14-2013	1-14-2013	37	F	3543-12	66064338	ANTIBIATIC	APICAL PERIODONTITIS	OPDC03A		4.88	1.5	6.38	Legal
646	1-14-2013	1-14-2013	44	F	1145-12	16417498	ANTIBIATIC	APICAL PERIODONTITIS	OPDC03A		4.88	1.5	6.38	Legal
647	1-14-2013	1-14-2013	6	F	0178-12	16440432	ANTIBIATIC	CARIES	OPDC03A		4.88	2.3	7.18	Legal
648	1-14-2013	1-14-2013	54	F	0173-12	16472233	ANTIBIATIC	APICAL PERIODONTITIS	OPDC03A		4.88	15.96	20.84	Fraudulent
649	2013-02-01	2013-02-01	70	M	6020-12	1652590	ANTIBIATIC	APICAL PERIODONTITIS	OPDC03A		4.88	1.5	6.38	Legal
650	2013-02-01	2013-02-01	27	M	0013-13	74081926	ANTIBIATIC	PERIODONTITIS	OPDC03A		4.88	14.3	19.18	Fraudulent
651	2013-02-01	2013-02-01	29	F	0014-13	16358559	ANTIBIATIC	CARIES	OPDC03A		4.88	1.5	6.38	Legal
652	2013-02-01	2013-02-01	62	M	0022-13	69952060	ANTIBIATIC	CARIES	OPDC03A		4.88	1.5	6.38	Legal
653	2013-02-01	2013-02-01	28	M	0009-12	76592382	ANTIBIATIC	CARIES	OPDC03A		4.88	1.5	6.38	Legal
654	1-14-2013	1-14-2013	27	M	0010-13	66621249	ANTIBIATIC	CARIES	OPDC03A		4.88	1.5	6.38	Legal
655	2013-04-01	2013-04-01	4	F	0054-13	85299862	ANTIBIATIC	CARIES	OPDC03A		4.88	8	12.88	Fraudulent
656	2013-04-01	2013-04-01	5	M	0081-13	81878067	ANTIBIATIC	CARIES	OPDC03A		4.88	8	12.88	Fraudulent
657	12-26-2012	12-26-2012	2	F	413775	80014341			OPDC06C		5.98	2.9	8.88	Legal
658	12-26-2012	12-26-2012	13	F	421483	67789679			OPDC06C		5.98	0.2	6.18	Legal
659	12-26-2012	12-26-2012	2	F	421482	65478384			OPDC06C		5.98	10.13	16.11	Fraudulent
660	12-28-2012	12-28-2012	1	M	421742	67261041			OPDC06C		5.98	2	7.98	Legal
661	12-28-2012	12-28-2012	2	F	421776	65947745			OPDC06C		5.98	8	13.98	Fraudulent
662	12-28-2012	12-28-2012	10	F	421673	81913973			OPDC06C		8.78	1.33	10.11	Legal
663	12-28-2012	12-28-2012	1	M	421768	83481430			OPDC06C		8.78	3.5	12.28	Legal
664	2012-08-10	2012-08-10	1	M	372938	78531335			OPDC06C		5.98		5.98	Legal
665	2012-11-12	2012-11-12	10	F	221041	16485517			OPDC06C		5.98	1.33	7.31	Legal
666	2012-12-28	2012-12-30	64	M	421574	15547673		HYPERTENSION	OPDC0A	I10	90.22		90.22	Fraudulent
667	2012-12-24	2012-12-28	43	M	418464	89313091		CEREBRO VASCULAR ACCIDENT	OPDC0A	I64	128.18	84	212.18	Fraudulent
668	2012-11-28	2012-12-26	50	F	417232	88526955	INCISION DAMAGE&DEBRIDEMENT	CELLULITIS RT LEG	OPDC0A	LO3.9	141.44	309.22	450.66	Fraudulent
669	2013-11-01	2013-11-01	42	M	0153-13	46951744	ANTIBIATIC	DENTOALVEOLAR	OPDOC3A		4.88	4.88	9.76	Legal
670	2013-11-01	2013-11-01	34	F	0162-12	81753790	ANTIBIATIC	APICAL PERIODONTITIS	OPDOC3A		4.88	15.96	20.84	Fraudulent
671	2013-11-01	2013-11-01	55	M	48561-12	16531536	ANTIBIATIC	APICAL PERIODONTITIS	OPDOC3A		4.88	5.96	10.84	Fraudulent
672	2013-11-01	2013-11-01	41	F	0152-13	64475045	ANTIBIATIC	DENTOALVEOLAR	OPDOC3A		4.88	15.96	20.84	Fraudulent
673	2013-11-01	2013-11-01	52	M	0154-13	16809210	CANULLTAL	CARIES	OPDOC3A		4.88	5.4	10.28	Legal
674	2013-07-01	2013-07-01	8	M	0085-12	16393330	MEDICATION	APICAL PERIODONTITIS	OPDOC3A		4.88	8.63	13.51	Fraudulent
675	2013-07-01	2013-07-01	30	F	0066-13	16462033	ANTIBIATIC	CARIES	OPDOC3A		4.88	1.5	6.38	Legal
676	2013-07-01	2013-07-01	84	F	0068-13	16493572	ANTIBIATIC	CARIES	OPDOC3A		4.88	1.5	6.38	Legal
677	2013-08-01	2013-08-01	22	F	0107-13	16421444	ANTIBIATIC	PERIODONTITIS	OPDOC3A		4.88	5.42	10.3	Legal
678	2013-12-01	2013-12-01	53	F	421319	66845996	BANDAGING	FRACTURED	ORTH01A		38.48		38.48	Legal
679	12-20-2012	12-20-2012	30	F	420584	45796631	BANDAGING		ORTH01A		38.48		38.48	Legal
680	12-24-2012	12-24-2012	53	M	311009	66208775	BANDAGING	FRACTURE	ORTH01A		49.14		49.14	Legal
681	1-25-2013	1-25-2013	54	F	425198	82799732	BANDAGING	FIBULA FRACTURE	ORTH01C		36.14		36.14	Legal
682	1-24-2013	1-24-2013	62	M	425897	16495533	BANDAGING	COLLIES FRACYURE	ORTH01C		36.14		36.14	Legal
683	2013-07-01	2013-07-01	49	M	421304	63369414	BANDAGING	FRACTURED	ORTH01C		36.14		36.14	Legal
684	2013-04-01	2013-04-01	12	M	422807	16439100	BANDAGING	FRACTURED	ORTH01C		36.14	0.41	36.55	Legal
685	1-29-2013	1-29-2013	71	F	1009499	16473134	BANDAGING	FRACTURED	ORTH01C		46.02		46.02	Legal
686	1-29-2013	1-29-2013	8	M	422156	16458870	BANDAGING		ORTH01C		46.02		46.02	Legal
687	1-28-2013	1-28-2013	7	M	426095	38061628	BANDAGING		ORTH01C		46.02		46.02	Legal
688	1-29-2013	1-29-2013	3	M	342118	71868280	BANDAGING		ORTH01C		46.02		46.02	Legal
689	2013-11-01	2013-11-01	27	M	423902	86691577	BANDAGING	MODERATE HEAD INJURY	ORTH01C		38.48		38.48	Legal
690	1-14-2013	1-14-2013	24	M	424054	68436899	BANDAGING	RIGHT ACETABULAR FRACTURE	ORTH01C		36.14		36.14	Legal
691	12-27-2012	12-27-2012	22	M	421625	82634617	BANDAGING		ORTH01C		36.14		36.14	Legal
692	12-24-2012	12-24-2012	47	M	405648	81940438	BANDAGING		ORTH01C		46.02		46.02	Legal
693	11-22-2012	11-22-2012	7	M	416590	67741157	BANDAGING		ORTH01C		46.02	3.4	49.42	Legal
694	11-19-2012	11-19-2012	27	M	416227	80644823	BANDAGING		ORTH01C		36.14	0.35	36.49	Legal
695	2013-03-01	2013-03-01	55	F	4201830	16507995	CLOSED REDUCTION	DISPLACE RADAIL	ORTH04A		244.01		244.01	Legal
696	12-22-2012	12-22-2012	54	F	420830	16507995	CLOSED REDUCTION	RT RAPLIAL	ORTH04A		244.01		244.01	Legal
697	12-24-2012	12-24-2012	61	F	337859	73893215	CLOSED REDUCTION	TIBIA FRACTURE	ORTH04A		340.99		340.99	Legal
698	12-22-2012	12-22-2012	37	F	418957	16429615	CLOSED REDUCTION		ORTH04A		340.99		340.99	Legal
699	2012-06-12	2012-06-12	2	F	306735	84559868	CLOSED REDUCTION OF FRACTURE	FRACTURE	ORTH04C		205.66		205.66	Legal
700	1-26-2013	1-26-2013	33	M	426121	82379615	DRESSING	LAC LT EYE BOW	ORTH06A		19.5	30.94	50.44	Fraudulent
701	2013-04-01	2013-04-01	44	M	421298	82397333	DRESSING		ORTH06A		17.16	69.26	86.42	Fraudulent
702	1-19-2012	1-19-2012	49	F	414637	52744005	CLOSED REDUCTION		ORTH06A		17.16	2.02	19.18	Legal
703	11-29-2012	11-29-2012	30	M	417769	83297840	DRESSING	MULTIPLE ABRASIAN	ORTH06A		17.16		17.16	Legal
704	2013-01-04	2013-01-14	9	F	419752	84807161		MALNUTRITION	PAED05C	E43	98.93	3.46	102.39	Legal
705	2013-01-04	2013-01-12	10	F	399456	17619706		ANAMIA	PAED06C	D51.9	113.62	24.2	137.82	Legal
706	2013-01-03	2013-01-07	1	F	422577	75307310		SEVERE ANAEMIA	PAED06C	D50.9	113.62	1.3	114.92	Legal
707	2013-01-18	2013-01-20	2	M	425043	76533007		SEVERE ANAEMIA	PAED06C	D50.9	113.62	15.28	128.9	Legal
708	2012-12-30	2013-01-01	3	F	422231	89166022		NEONATAL JUNCDICE	PAED09C	P59.9	125.32	4.68	130	Legal
709	2013-01-12	2013-01-15	4	F	423969	69636535		NEONATAL JEURDURY	PAED09C	125.32	125.32	0.7	126.02	Legal
710	2013-01-21	2013-01-21	5	F	425394	87149399		NECRATAL SANDICE	PAED09C	P59.9	125.32		125.32	Legal
711	2012-12-05	2012-12-07	1	F	418577	56181479		NEONATAL JAUNDICE	PAED09C	P59.9	125.32		125.32	Legal
712	2012-11-23	2012-11-29	8	F	416538	88412826		HAEMOPERITONEUM	PAED09C	K66.1	204.88	220.91	425.79	Fraudulent
713	2013-01-03	2013-01-11	5DY	F	422677	83010443		NEONATAL JAUNDICE	PAED09H	P59.9	125.32	8.7	134.02	Fraudulent
714	2013-01-05	2013-01-07	1	F	422810	82971515		PRETERM	PAED10C	PO7.3	197.34	2.65	199.99	Legal
715	2013-01-02	2013-01-07	2	F	418167	87466621		PRETERM	PAED10C	PO7.4	197.34	1.4	198.74	Legal
716	2013-01-28	2013-01-30	1	F	426691	84232128		NEAR TERM NEONATE	PAED10C		197.34	2.65	199.99	Legal
717	2013-01-03	2013-01-05	3	F	418201	58201183		LEFT HEART ABSCESS	PAED10C		197.34	3.95	201.29	Legal
718	2013-01-08	2013-01-17	1	F	422371	89592971		PREMATURITY	PAED10C	P07.3	197.34	3.65	200.99	Legal
719	2013-01-17	2013-01-24	1	F	420665	87257207		PREMATURITY	PAED10C	P07.0	197.34	3.3	200.64	Legal
720	2013-01-22	2013-01-29	1	F	426149	16351012		LOW BIRTH WEIGHT	PAED10C	PO7.0	197.34	2.65	199.99	Legal
721	2013-01-10	2013-01-13	4	F	423575	84849302		HAOMORRAGIC DISEASE	PAED10C		197.34	3.1	200.44	Legal
722	2013-01-21	2013-01-28	2	F	418167	87466621		PREMATURITY	PAED10C	PO7.2	197.34	3.8	201.14	Legal
723	2012-12-30	2013-01-05	8	M	422059	81726046		ANAEMIA	PAEDO6C	D51.9	155.48	26.96	182.44	Fraudulent
724	2013-01-12	2013-01-18	4	F	119243	16853970		BURNS	PSUR27C	T30.0	644.15	61.57	705.72	Legal
725	1-27-2013	1-27-2013	76	F	426194	16469174			ZOOM02A		13.03	8.35	21.38	Fraudulent
726	1-30-2013	1-30-2013	75	F	426664	59827482			ZOOM02A		13.03	10.32	23.35	Fraudulent
727	1-30-2013	1-30-2013	55	F	79099	56381662			ZOOM02A		8.66		8.66	Legal
728	1-29-2013	1-29-2013	41	M	426606	67925241			ZOOM02A		13.03	8	21.03	Fraudulent
729	1-31-2013	1-31-2013	49	F	401863	56855371			ZOOM02A		8.66	84	92.66	Fraudulent
730	1-16-2013	1-16-2013	6	F	3903901	86496649			ZOOM02C		7.6	7.06	14.66	Legal
731	1-16-2013	1-16-2013	1	M	424652	74833403			ZOOM02C		7.6	38.56	46.16	Fraudulent
732	1-16-2013	1-16-2013	1	F	423207	10767418			ZOOM02C		7.6	29.92	37.52	Fraudulent
733	2013-07-01	2013-07-01	6	M	145894	50453668			ZOOM02C		7.6	4.36	11.96	Legal
734	1-23-2013	1-23-2013	4	F	244118	52140129			ZOOM02C		7.6		7.6	Legal
735	1-23-2013	1-23-2013	6	F	244744	37343282			ZOOM02C		7.6	25.45	33.05	Fraudulent
736	1-24-2013	1-24-2013	12	F	425917	76001477			ZOOM02C		7.66	6.9	14.56	Legal
737	1-26-2013	1-26-2013	3	M	413112	76101255			ZOOM02C		7.6	7	14.6	Legal
738	1-22-2013	1-22-2013	2	M	389991	77736668			ZOOM02C		11.48	18.28	29.76	Fraudulent
739	1-13-2013	1-13-2013	2	F	424063	84392113			ZOOM02C		11.48	2.33	13.81	Legal
740	1-15-2013	1-15-2013	2	F	303027	82310829			ZOOM02C		7.6	5.69	13.29	Legal
741	2013-10-01	2013-10-01	1	F	423561	81556665			ZOOM02C		11.48	16.23	27.71	Fraudulent
742	1-24-2013	1-24-2013	6	M	320568	60207068			ZOOM02C		7.6	17.98	25.58	Fraudulent
743	1-25-2013	1-25-2013	9	M	408372	87745792			ZOOM02C		7.6	14.4	22	Fraudulent
744	1-21-2013	1-21-2013	10	F	221041	16485517			ZOOM02C		7.6	4	11.6	Legal
745	2013-11-01	2013-11-01	80	F	358726	53377406			ZOOMO2A		13.03		13.03	Legal
746	2013-01-01	2013-01-01	46	M	422260	66383837			ZOOMO2A		8.66	22.3	30.96	Fraudulent
747	2013-01-01	2013-01-01	70	M	421590	86752903			ZOOMO2A		8.66	79.82	88.48	Fraudulent
748	2013-07-01	2013-07-01	35	F	416192	82057154			ZOOMO2A		8.66	0.18	8.84	Legal
749	2013-07-01	2013-07-01	80	F	423066	16418410			ZOOMO2A		8.66		8.66	Legal
750	2013-01-12	2013-01-14	5	M	287349	63701101		SEIZURE DISORDER	PAED20C	R56.8	104.52	8.3	112.82	Fraudulent
