# Supplementary material for: Decision Support System (DSS) for Fraud Detection in Health Insurance Claims Using Genetic Support Vector Machines (GSVMs)
Source: Hindawi journal article supplement (doi:10.1155/2019/1432597), 2019-09-02
Supplement: f1 [file 1432597.f1.zip › 1432597.f1/ReData5_1000.xlsx]

## Sheet: Sheet1
No	AttendanceDate	DischargeDate	Age	Sex	FolderNo	NHIS_ID_No	Procudure	Diagnosis	G_DRG	ICD10	Service	Medical	Total	Output
1	2012-11-22	2012-12-20	37	M	410390	78739282	INCISION DAMAGE&DEBRIDEMENT	DIABETIC FOOT(RT)	ASUR31A	0	141.44	258.34	399.78	Fraudulent
2	2012-12-25	2012-12-31	22	F	421455	66989440	LAPAROLONY	ABDOMIAL TRIRY 2 FRAUMA	ASURO8A	0	332.02	91.2	423.22	Legal
3	2013-01-21	2013-01-28	38	F	46489	63313932	THYRIODECTOMY	TOXIC MULTINODULER GOITRE	ASUR01A	0	339.04	71.38	410.42	Legal
4	2013-01-03	2013-01-08	21	F	69363	16437273	APPENCEMTOMY	ACUTE APPENDCSTIS	ASUR08A	0	332.02	132.2	464.22	Legal
5	2013-01-03	2013-01-11	32	F	270830	16369104	LAPAROTOMY	APPENDICITIS	ASUR08A	0	332.02	110.05	442.07	Legal
6	2013-01-14	2013-01-16	15	M	424033	61273367	APPENCEMTOMY	APPENDICITIS	ASUR08A	0	332.02	101.74	433.76	Legal
7	2013-01-09	2013-01-11	26	F	422659	71979225		PERFIRATION	ASUR09A	0	64.09	46.24	110.33	Legal
8	2013-01-18	2013-01-22	49	M	228713	16467451		ACUTE EPIDIDYMO	ASUR09A	0	64.09	29.04	93.13	Legal
9	2013-01-20	2013-01-23	69	M	425175	77858288		VARICEAL BLEEDING	ASUR09A	0	64.09	13.74	77.83	Legal
10	2013-01-03	2013-01-06	34	M	420296	85334094	HERNIA REPAIR HYDROCELECTOMY	MESENTERIC HERNIA	ASUR19A	0	267.8	57.95	325.75	Legal
11	2013-01-08	2013-01-10	18	F	423260	69264801	HERMORRHAPHY	STRANGULATED FERNORAL HERNIA	ASUR19A	0	267.8	48.34	316.14	Fraudulent
12	2013-01-03	2013-01-09	48	F	423109	16429713	HERMORRHAPHY	PARAUMBILICAL	ASUR20A	0	144.82	63.22	208.04	Fraudulent
13	2013-01-29	2013-01-31	80	M	422093	79413422	HERNMORRAPHY	RIGHT HIGUNIAL HERNIPLAPHY	ASUR20A	0	144.82	71.14	215.96	Fraudulent
14	2013-01-21	2013-01-25	78	M	421333	17073387	HERMORRHAPHY	INGMINAL HERNIA	ASUR20A	0	144.82	33.3	178.12	Legal
15	2013-01-03	2013-01-21	68	M	141891	26922133	PROSTATESTOMY	BENING PROSTATIC HYPERTROPHY	ASUR21A	0	478.14	76.8	554.94	Fraudulent
16	2013-01-20	2013-01-25	58	M	425185	82879407	SURGERY ON SCROTUM	TORSION OF TESTIS	ASUR22A	0	126.1	59.54	185.64	Legal
17	2013-01-03	2013-01-11	50	M	18919	16370459	INCISUN AND DRIANAGE	PALMER ABSCESS	ASUR31A	0	141.44	160.24	301.68	Fraudulent
18	2013-01-08	2013-01-19	35	F	423402	60381032	DEBRIDEMRNT	SEPTIC WOUND	ASUR31A	0	141.44	356.4	497.84	Fraudulent
19	1-28-2013	1-28-2013	31	F	0296-13	86195382	EXTRACTION	APICALPERIODDICALITY	DENT01A	0	15.47	0	15.47	Legal
20	1-25-2013	1-25-2013	41	M	0289-13	16538564	EXTRACTION	CARIES	DENT01A	0	15.47	0	15.47	Legal
21	1-25-2013	1-25-2013	26	F	0261-13	52856288	EXTRACTION	APICALPERIODDICALITY	DENT01A	0	15.47	0	15.47	Legal
22	1-24-2013	1-24-2013	26	F	0259-13	63595526	EXTRACTION	APICALPERIODDICALITY	DENT01A	0	15.47	0	15.47	Legal
23	1-24-2013	1-24-2013	14	F	0258-13	37000947	EXTRACTION	APICALPERIODDICALITY	DENT01A	0	15.47	0	15.47	Legal
24	1-24-2013	1-24-2013	43	F	0193-13	15600749	EXTRACTION	APICALPERIODDICALITY	DENT01A	0	15.47	0	15.47	Legal
25	1-24-2013	1-24-2013	63	F	0056-13	16473917	EXTRACTION	APICALPERIODDICALITY	DENT01A	0	15.47	0	15.47	Legal
26	1-24-2013	1-24-2013	64	F	0228-13	16514946	EXTRACTION	APICALPERIODDICALITY	DENT01A	0	15.47	0	15.47	Legal
27	1-22-2013	1-22-2013	12	F	0229-13	16432775	EXTRACTION	APICALPERIODDICALITY	DENT01A	0	15.48	0	15.48	Legal
28	1-22-2013	1-22-2013	6	F	I178-13	16440432	EXTRACTION	APICALPERIODDICALITY	DENT01A	0	14.95	0	14.95	Legal
29	1-22-2013	1-22-2013	58	M	0227-13	48652048	EXTRACTION	PERIODITIS	DENT01A	0	15.47	0	15.47	Legal
30	1-22-2013	1-22-2013	54	M	0223-13	79875425	EXTRACTION	APICALPERIODDICALITY	DENT01A	0	15.47	0	15.47	Legal
31	1-23-2013	1-23-2013	34	F	0162-13	81753790	EXTRACTION	APICALPERIODDICALITY	DENT01A	0	15.47	0	15.47	Legal
32	1-23-2013	1-23-2013	77	F	0253-13	55952646	EXTRACTION	APICALPERIODDICALITY	DENT01A	0	15.47	0	15.47	Legal
33	1-23-2013	1-23-2013	9	M	2174-12	16371882	EXTRACTION	CARIES	DENT01A	0	14.95	0	14.95	Legal
34	1-23-2013	1-23-2013	31	F	0248-13	67416693	EXTRACTION	APICALPERIODDICALITY	DENT01A	0	15.47	0	15.47	Legal
35	1-23-2013	1-23-2013	29	M	0262-13	75402323	EXTRACTION	APICALPERIODDICALITY	DENT01A	0	15.47	0	15.47	Legal
36	1-31-2013	1-31-2013	6	M	1306-11	16817208	EXTRACTION	APICALPERIODDICALITY	DENT01A	0	14.95	0	14.95	Legal
37	1-31-2013	1-31-2013	25	F	0375-13	80166265	EXTRACTION	PERIODITIS	DENT01A	0	15.47	0	15.47	Legal
38	2013-10-01	2013-10-01	45	F	0083-13	16380545	EXTRACTION	APICALPERIODDICALITY	DENT01A	0	15.47	0	15.47	Legal
39	1-31-2013	1-31-2013	25	M	0338-13	82681192	EXTRACTION	APICALPERIODDICALITY	DENT01A	0	15.47	0	15.47	Legal
40	2013-09-01	2013-09-01	83	F	0065-13	16493572	EXTRACTION	CARIES	DENT01A	0	15.47	0	15.47	Legal
41	2013-09-01	2013-09-01	10	F	1506-09	16414199	EXTRACTION	CARIES	DENT01A	0	14.95	0	14.95	Legal
42	2013-08-01	2013-08-01	57	F	0086-13	16502593	EXTRACTION	CARIES	DENT01A	0	15.47	0	15.47	Legal
43	2013-10-01	2013-10-01	34	M	0081-13	52399381	EXTRACTION	CARIES	DENT01A	0	15.47	0	15.47	Legal
44	2013-10-01	2013-10-01	45	F	4474-09	55470108	EXTRACTION	CARIES	DENT01A	0	15.47	0	15.47	Legal
45	2013-10-01	2013-10-01	39	F	1846-08	84894948	EXTRACTION	CARIES	DENT01A	0	15.47	0	15.47	Legal
46	2013-10-01	2013-10-01	57	F	1145-07	67083596	EXTRACTION	APICALPERIODDICALITY	DENT01A	0	15.57	0	15.57	Legal
47	2013-10-01	2013-10-01	66	F	0097-13	61376326	EXTRACTION	CARIES	DENT01A	0	15.47	0	15.47	Legal
48	2013-10-01	2013-10-01	20	M	0053-13	16418234	EXTRACTION	CARIES	DENT01A	0	15.47	0	15.47	Legal
49	2013-10-01	2013-10-01	6	F	0078-13	62848849	EXTRACTION	CARIES	DENT01A	0	14.95	0	14.95	Legal
50	1-31-2013	1-31-2013	9	M	0377-13	66845370	EXTRACTION	RETAINED ROOT	DENT01C	0	14.95	2.3	17.25	Legal
51	1-18-2013	1-18-2013	8	M	0085-13	16393330	EXTRACTION	CARIES	DENT01C	0	14.95	0	14.95	Legal
52	1-18-2013	1-18-2013	6	F	4836-12	51430060	EXTRACTION	CARIES	DENT01C	0	14.95	0	14.95	Legal
53	1-28-2013	1-28-2013	10	M	4013-12	74936113	EXTRACTION	CARIES	DENT01C	0	14.95	2.5	17.45	Legal
54	1-30-2013	1-30-2013	7	M	0332-13	66962221	EXTRACTION	APICAL PEROIDONITITS	DENT01C	0	14.95	0	14.95	Legal
55	2013-10-01	2013-10-01	10	M	0060-13	54512774	EXTRACTION	CARIES	DENT01C	0	14.95	0	14.95	Legal
56	2013-10-01	2013-10-01	5	M	0032-13	63427090	EXTRACTION	CARIES	DENT01C	0	15.47	0	15.47	Legal
57	2013-10-01	2013-10-01	10	F	0098-13	16378528	EXTRACTION	APICALPERIODDICALITY	DENT01C	0	14.95	0	14.95	Legal
58	2013-10-01	2013-10-01	5	F	0054-13	85299862	EXTRACTION	CARIES	DENT01C	0	14.95	0	14.95	Legal
59	2013-10-01	2013-10-01	5	M	PP81-13	81878067	EXTRACTION	CARIES	DENT01C	0	14.95	0	14.95	Legal
60	1-31-2013	1-31-2013	24	F	0196-12	16374480	EXTRACTION	RETAINED ROOT	DENT08A	0	49.01	1.8	50.81	Legal
61	2013-11-01	2013-11-01	35	F	4934-12	84164038	CONSULTATION	DRY SOCKET	DENT12A	0	150.28	0	150.28	Legal
62	2013-11-01	2013-11-01	35	F	0136-13	66610592	CURETTAGE OF SOCKET	DRY SOCKET	DENT12A	0	150.28	0	150.28	Legal
63	1-31-2013	1-31-2013	63	M	0376-13	16358187	EXTRACTION	FRACTURED	DENT20A	0	118.17	0	118.17	Legal
64	1-23-2013	1-23-2013	62	M		52852741			INVES	0	8.26	0	8.26	Fraudulent
65	2013-10-01	2013-10-01	56	M		37555883			INVES16E	0	1.98	0	1.98	Fraudulent
66	2013-04-01	2013-04-01	21	M		83507927			INVES21D	0	5.95	0	5.95	Fraudulent
67	2013-02-01	2013-02-01	32	F		57459068			INVES21D	0	5.95	0	5.95	Fraudulent
68	2013-03-01	2013-03-01	36	F		67899544			INVES24D	0	6.92	0	6.92	Fraudulent
69	1-15-2013	1-15-2013	36	F		15115077			INVES24D	0	6.92	0	6.92	Fraudulent
70	2013-07-01	2013-07-01	56	F		16509239			INVES27E	0	3.04	0	3.04	Fraudulent
71	2013-03-01	2013-03-01	17	F		16503921			INVES41D	0	3.17	0	3.17	Fraudulent
72	2013-04-01	2013-04-01	47	F		31859662			INVES41D	0	3.17	0	3.17	Fraudulent
73	2013-02-01	2013-02-01	51	F		67666151			INVES41D	0	3.17	0	3.17	Fraudulent
74	2013-02-01	2013-02-01	74	M		38420766			INVES41D	0	3.17	0	3.17	Fraudulent
75	1-30-2013	1-30-2013	48	F		83089623			INVES41D	0	3.17	0	3.17	Fraudulent
76	1-17-2013	1-17-2013	61	F		16397911			INVES41D	0	3.17	0	3.17	Fraudulent
77	1-15-2013	1-15-2013	68	F		41147744			INVES41D	0	3.17	0	3.17	Fraudulent
78	1-15-2013	1-15-2013	32	M		84121511			INVES41D	0	3.17	0	3.17	Fraudulent
79	1-15-2013	1-15-2013	38	F		71107238			INVES41D	0	3.17	0	3.17	Fraudulent
80	2013-08-01	2013-08-01	72	F		59933210			INVES41D	0	3.17	0	3.17	Fraudulent
81	2013-10-01	2013-10-01	55	F		15728541			INVES41D	0	3.17	0	3.17	Fraudulent
82	2013-10-01	2013-10-01	47	M		16501054			INVES41D	0	3.17	0	3.17	Fraudulent
83	2013-10-01	2013-10-01	44	F		80664633			INVES41D	0	3.17	0	3.17	Fraudulent
84	2013-07-01	2013-07-01	59	F		78688946			INVES41D	0	3.17	0	3.17	Fraudulent
85	1-15-2013	1-15-2013	38	M		35872721			INVES41D	0	3.17	0	3.17	Fraudulent
86	1-14-2013	1-14-2013	58	F		16380957			INVES41D	0	3.17	0	3.17	Fraudulent
87	1-14-2013	1-14-2013	64	F		16354489			INVES41D	0	3.17	0	3.17	Fraudulent
88	1-30-2013	1-30-2013	30	M		60665804			INVES52D	0	4.32	0	4.32	Fraudulent
89	2013-10-01	2013-10-01	42	F		42946565			INVES52D	0	4.32	0	4.32	Fraudulent
90	2013-08-01	2013-08-01	1	M		86153139			INVES52D	0	4.32	0	4.32	Fraudulent
91	2013-07-01	2013-07-01	46	M		44326302			INVES52D	0	4.32	0	4.32	Fraudulent
92	2013-11-01	2013-11-01	4	M		75155982			INVES56D	0	2.93	0	2.93	Fraudulent
93	1-15-2013	1-15-2013	45	M		54066893			INVES58D	0	12.09	0	12.09	Fraudulent
94	1-18-2013	1-18-2013	49	M		77424687			INVES58D	0	12.09	0	12.09	Fraudulent
95	1-18-2013	1-18-2013	76	F		84112681			INVES58D	0	12.09	0	12.09	Fraudulent
96	1-18-2013	1-18-2013	54	M		52816434			INVES58D	0	12.09	0	12.09	Fraudulent
97	1-16-2013	1-16-2013	67	F		56694726			INVES58D	0	12.09	0	12.09	Fraudulent
98	1-16-2013	1-16-2013	68	F		15584735			INVES58D	0	12.09	0	12.09	Fraudulent
99	1-16-2013	1-16-2013	17	M		67132608			INVES58D	0	12.09	0	12.09	Fraudulent
100	2013-09-01	2013-09-01	36	F		48641475			INVES58D	0	12.09	0	12.09	Fraudulent
101	2013-07-01	2013-07-01	63	M		16511337			INVES58D	0	12.09	0	12.09	Fraudulent
102	2013-04-01	2013-04-01	59	F		16393830			INVES75D	0	7.28	0	7.28	Fraudulent
103	2013-02-01	2013-02-01	22	M		62689854			INVES75D	0	7.28	0	7.28	Fraudulent
104	2013-03-01	2013-03-01	58	F		63056129			INVES75D	0	7.28	0	7.28	Fraudulent
105	2013-04-01	2013-04-01	63	F		16444597			INVES75D	0	7.28	0	7.28	Fraudulent
106	1-15-2013	1-15-2013	63	F		16451103			INVES75D	0	7.28	0	7.28	Fraudulent
107	1-24-2013	1-24-2013	73	M		16439445			INVES75D	0	7.28	0	7.28	Fraudulent
108	1-22-2013	1-22-2013	54	F		53546959			INVES75D	0	7.28	0	7.28	Fraudulent
109	1-21-2013	1-21-2013	51	M		16512118			INVES75D	0	7.28	0	7.28	Fraudulent
110	1-22-2013	1-22-2013	50	M		67923809			INVES75D	0	7.28	0	7.28	Fraudulent
111	2013-02-01	2013-02-01	71	F		85965128			INVES89D	0	12.09	0	12.09	Fraudulent
112	2013-02-01	2013-02-01	57	F		61935875			INVES89D	0	12.09	0	12.09	Fraudulent
113	2013-08-01	2013-08-01	49	F		48431100			INVES89D	0	12.09	0	12.09	Fraudulent
114	2013-08-01	2013-08-01	69	M		67654684			INVES89D	0	12.09	0	12.09	Fraudulent
115	2013-04-01	2013-04-01	60	F		85372758			INVES89D	0	12.09	0	12.09	Fraudulent
116	2013-04-01	2013-04-01	39	M		80765363			INVES89D	0	12.09	0	12.09	Fraudulent
117	2013-04-01	2013-04-01	64	F		47607044			INVES89D	0	12.09	0	12.09	Fraudulent
118	2013-04-01	2013-04-01	67	F		75255037			INVES89D	0	12.09	0	12.09	Fraudulent
119	2013-07-01	2013-07-01	44	M		84533096			INVES89D	0	12.09	0	12.09	Fraudulent
120	2013-07-01	2013-07-01	55	M		78432860			INVES89D	0	12.09	0	12.09	Fraudulent
121	2013-07-01	2013-07-01	59	M		16384770			INVES89D	0	12.09	0	12.09	Fraudulent
122	2013-11-01	2013-11-01	35	M		16468012			INVES89D	0	12.09	0	12.09	Fraudulent
123	2013-09-01	2013-09-01	42	F		81878620			INVES89D	0	12.09	0	12.09	Fraudulent
124	2013-10-01	2013-10-01	41	F		52806340			INVES89D	0	12.09	0	12.09	Fraudulent
125	1-15-2013	1-15-2013	38	F		60832673			INVES89D	0	12.09	0	12.09	Fraudulent
126	1-15-2013	1-15-2013	36	F		68010212			INVES89D	0	12.09	0	12.09	Fraudulent
127	1-15-2013	1-15-2013	73	M		15569754			INVES89D	0	12.09	0	12.09	Fraudulent
128	1-15-2013	1-15-2013	49	F		16396800			INVES89D	0	12.09	0	12.09	Fraudulent
129	1-15-2013	1-15-2013	60	F		65830549			INVES89D	0	12.09	0	12.09	Fraudulent
130	1-15-2013	1-15-2013	47	M		64203148			INVES89D	0	12.09	0	12.09	Fraudulent
131	1-30-2013	1-30-2013	6	M		67130880			INVES89D	0	12.09	0	12.09	Fraudulent
132	1-17-2013	1-17-2013	28	F		86605774			INVES89D	0	12.09	0	12.09	Fraudulent
133	1-17-2013	1-17-2013	56	M		16390759			INVES89D	0	12.09	0	12.09	Fraudulent
134	1-18-2013	1-18-2013	47	M		50536880			INVES89D	0	12.09	0	12.09	Fraudulent
135	2013-03-01	2013-03-01	72	F		53714072			INVES90D	0	16.04	0	16.04	Fraudulent
136	2013-03-01	2013-03-01	56	M		82573784			INVES90D	0	16.04	0	16.04	Fraudulent
137	1-24-2013	1-24-2013	64	M		60568304			INVES90D	0	16.04	0	16.04	Fraudulent
138	1-24-2013	1-24-2013	62	F		51340149			INVES90D	0	16.04	0	16.04	Fraudulent
139	1-28-2013	1-28-2013	59	F		17623354			INVES90D	0	16.04	0	16.04	Fraudulent
140	1-18-2013	1-18-2013	60	F		66666318			INVES90D	0	16.04	0	16.04	Fraudulent
141	1-14-2013	1-14-2013	17	M		16373379			INVES90D	0	16.04	0	16.04	Fraudulent
142	2013-09-01	2013-09-01	66	F		85428029			INVES90D	0	16.04	0	16.04	Fraudulent
143	2013-07-01	2013-07-01	39	F		36600316			INVES90D	0	16.04	0	16.04	Fraudulent
144	1-14-2013	1-14-2013	46	F		64914656			INVES90D	0	16.04	0	16.04	Fraudulent
145	2013-09-01	2013-09-01	67	F		16518708			INVES90D	0	16.04	0	16.04	Fraudulent
146	1-15-2013	1-15-2013	65	M		55700419			INVES90D	0	16.04	0	16.04	Fraudulent
147	1-17-2013	1-17-2013	65	F		43855973			INVES90D	0	16.04	0	16.04	Fraudulent
148	1-23-2013	1-26-2013	87	F	129085	16423899		HYPERGLYCAEMIA	MED102A	0	190.45	44.05	234.5	Fraudulent
149	1-15-2013	1-22-2013	51	M	416597	78535114		HYPERGLYCAEMIA	MED103A	0	190.45	61.5	251.95	Legal
150	1-20-2013	1-23-2013	75	M	422968	61308950		ANAEMIA	MED106A	0	128.83	5.8	134.63	Legal
151	1-25-2013	1-28-2013	33	F	269866	67135672		S. ANAEMIA	MED106A	0	128.83	32.86	161.69	Legal
152	1-27-2013	1-29-2013	35	F	426150	71602244		SEIZURE ATTACK	MED112A	0	104.78	17.6	122.38	Legal
153	1-15-2013	1-24-2013	34	M	424356	39203332		C. ACCIDENT	MED114A	0	128.18	17.86	146.04	Legal
154	1-24-2013	1-27-2013	15	F	58438	16391446		VASOCLUSIVE CRISIS IN SICKLE CELL DISEASE	MED116A	0	123.11	58.8	181.91	Legal
155	1-13-2013	1-22-2013	20	F	30070	16493692		SICKLE CELL DISEASE WITH VOC	MED116A	0	123.11	85.12	208.23	Fraudulent
156	1-25-2013	1-27-2013	75	F	426022	75246648		ACUTE WATERY DIARH.	MED123A	0	88.92	18.7	107.62	Legal
157	1-28-2013	1-31-2013	47	F	426124	66799749		ACUTE GASTRO-E.	MED123A	0	88.92	26.82	115.74	Legal
158	1-27-2013	1-30-2013	45	F	426182	58069345		ACUTE GASTRO-E.	MED123A	0	88.92	14.56	103.48	Legal
159	1-19-2013	1-26-2013	47	M	412435	79536767		PNEUMONIA	MED130A	0	148.46	120.74	269.2	Legal
160	1-22-2013	1-26-2013	46	F	425469	87236206		PNEUMONIA	MED130A	0	148.46	118.58	267.04	Legal
161	1-22-2013	1-25-2013	7	M	381667	68430832		CELLULITIS OF BOTH LEGS	MED131A	0	63.96	96.4	160.36	Fraudulent
162	1-22-2013	1-29-2013	76	F	392335	16456322		HYPERGLYCAEMIA	MED132A	0	90.22	221.05	311.27	Fraudulent
163	1-18-2013	1-22-2013	56	M	424953	16506601		DEEP VEIN THROMLOSIS	MED134A	0	133.64	128.1	261.74	Fraudulent
164	1-15-2013	1-23-2013	67	M	310974	65039702		DEEP VEIN THROMLOSIS	MED134A	0	133.64	18.6	152.24	Legal
165	2012-08-12	2013-12-01	66	M	419017	88731803		DEEP VEIN THROMLOSIS	MED134A	0	133.64	585.22	718.86	Fraudulent
166	1-14-2013	1-31-2013	37	M	424269	88112969		RETROVIRAL INFECTION WITH ENCEPHALO	MED138A	0	158.47	13.95	172.42	Legal
167	2013-03-01	1-13-2013	35	M	420836	76515474		RETROVIRAL INFECTION WITH ENCEPHALO	MED138A	0	158.47	18.78	177.25	Legal
168	2012-12-14	2012-12-26	44	F	419854	16358598		CELLULITIS R. LEG	MEDI 03A	0	190.45	369.22	559.67	Fraudulent
169	2012-12-19	2012-12-24	26	M	397987	87239372		HYPERGLYCEMIA	MEDI 03A	0	190.45	41.98	232.43	Legal
170	2012-12-18	2012-12-24	53	M	397517	80822959		HYPERGLYCEMIA	MEDI 03A	0	190.45	87.5	277.95	Fraudulent
171	2012-12-30	2013-01-05	53	F	422039	16510603		CEREBROVASCULAR ACCIDENT	MEDI 14A	0	128.18	41.7	169.88	Legal
172	2013-01-03	2013-01-06	45	F	397457	60247659		SEVERE HYPERTENSION	MEDI 14A	0	104.65	5.62	110.27	Legal
173	2012-12-28	2013-01-03	77	F	341568	16518751		CEREBROVASCULAR ACCIDENT	MEDI 14A	0	155.87	52.97	208.84	Legal
174	2013-01-01	2013-01-05	26	F	57964	16446157		SICKLE CELL DISEASE	MEDI 16A	0	123.11	16.48	139.59	Legal
175	2012-12-25	2012-12-29	67	M	421425	71397231		UPPERGASTRO INTESTINAL BLEEDING	MEDI 25A	0	186.55	0	186.55	Legal
176	27-112-2012	2012-12-31	67	F	418458	73989792		ORTHOSTATIC PNEUMONIA	MEDI 30A	0	148.46	195.03	343.49	Fraudulent
177	2012-12-31	2013-01-05	40	M	422275	74075463		ALCOLEF INDUCED GEOTOTIS	MEDI 36A	0	96.33	15.6	111.93	Legal
178	2013-01-05	2013-01-07	40	M	253881	37677757		CHRONIC LIVER DISEASE	MEDI02A	0	8.66	26.24	34.9	Legal
179	2013-01-13	2013-01-23	55	F	86387	16431311		DIABETUS MELLUTIS	MEDI02A	0	104.65	49.85	154.5	Legal
180	2013-01-16	2013-01-18	65	M	230405	66476232		DIABETUS MELLUTIS	MEDI02A	0	10.65	51.71	62.36	Legal
181	2013-01-16	2013-01-18	55	F	424689	16445934		HYPERTENSION	MEDI02A	0	104.65	40.3	144.95	Legal
182	2013-01-17	2013-01-21	55	F	424716	16350873		DIABETES MELLITUS	MEDI02A	0	104.65	53.4	158.05	Legal
183	1-26-2013	1-29-2013	70	F	421498	41865638		DIABETES MELLITUS	MEDI02A	0	104.65	44.35	149	Legal
184	1-28-2001	2013-02-02	50	F	236009	61343381		SEVERE HPERTENSION	MEDI02A	0	104.65	89.16	193.81	Fraudulent
185	1-25-2013	2013-02-02	49	F	210904	86988370		DIABETES	MEDI02A	0	190.45	12.9	203.35	Fraudulent
186	2013-07-01	2013-09-01	45	F	423108	16537152		DIABETES	MEDI02A	0	104.65	26.6	131.25	Legal
187	2013-10-01	1-17-2013	22	F	423632	89844502		DIABETES	MEDI02A	0	104.65	34.75	139.4	Legal
188	2012-12-25	2012-12-28	45	F	78850	16526892		DIABETIES	MEDI02A	0	104.65	45.8	150.45	Legal
189	2012-12-16	2012-12-27	50	M	420040	58504487		DIABETES MELHTUS	MEDI02A	0	104.65	94.92	199.57	Fraudulent
190	2012-12-19	2013-01-10	56	M	420305	16463671		DIABETES COMPLICATED	MEDI03A	0	190.45	52.7	243.15	Legal
191	2012-12-26	2013-01-02	67	M	421707	38030758		DIABETES MELLITUS	MEDI03A	0	190.45	6.8	197.25	Legal
192	2013-01-04	2013-01-07	64	M	421687	89633935		DIABETES(HYPERGLYCAENIL)	MEDI03A	0	190.45	5.6	196.05	Legal
193	1-21-2013	1-29-2013	54	F	425279	85350591		DIABETES MELLITUS COMPLICATED	MEDI03A	0	190.45	136.51	326.96	Legal
194	2013-03-01	1-15-2013	44	F	422590	82551289		DRESING	MEDI03A	0	190.45	131.28	321.73	Legal
195	2013-04-01	1-17-2013	25	F	78850	6526892		HYPERTENSION	MEDI03A	0	190.45	102.35	292.8	Legal
196	2012-12-13	2012-12-24	38	M	419673	57183696		DIABETIC KETEAUDOSIS	MEDI03A	0	190.45	86.6	277.05	Legal
197	2012-12-22	2012-12-24	87	F	254412	64252039		DIABETES MELHTUS	MEDI03A	0	190.45	2.5	192.95	Legal
198	2012-12-19	2012-12-25	47	M	59762	16420246		DIABETIC WITH HYPOGLYCEMIA	MEDI03A	0	190.45	38.1	228.55	Legal
199	2012-12-22	2012-12-28	65	F	397638	77078220		DIABETES KETOACIDOSIS	MEDI03A	0	190.45	79.36	269.81	Legal
200	2012-12-20	2012-12-24	50	F	419617	67475995		DIABETIS MELLITIS	MEDI03A	0	190.45	72.5	262.95	Legal
201	2012-12-12	2012-12-24	62	M	419456	57991757		HYPERGLYCAEMIA	MEDI03A	0	190.45	74.6	265.05	Legal
202	2013-01-08	2013-01-10	36	M	423386	65785968		ANAEMIA	MEDI06A	0	128.83	0	128.83	Legal
203	2013-01-10	2013-01-25	75	M	423649	52856382		ANAEMIA	MEDI06A	0	128.83	68.2	197.03	Fraudulent
204	2013-01-15	2013-01-18	14	F	424389	87149153		ANAEMIA	MEDI06A	0	128.83	27.64	156.47	Legal
205	2013-10-01	1-19-2013	16	F	423629	47378847		SEVERE ANAEMIA	MEDI06A	0	128.83	22.36	151.19	Legal
206	1-16-2013	1-20-2013	32	F	421860	60120617		ANAEMIA IN PREGNANCY	MEDI06A	0	128.83	0.06	128.89	Legal
207	2013-10-01	1-19-2013	91	F	416672	16447520		SEVERE ANAEMIA	MEDI06A	0	128.83	64.56	193.39	Fraudulent
208	1-16-2013	1-20-2013	22	F	419688	87585294		ANAEMIA IN CYESIS	MEDI06A	0	128.83	6.65	135.48	Legal
209	2012-12-28	2012-12-31	76	M	70020	16533792		ANEAMIA	MEDI06A	0	128.83	11.5	140.33	Legal
210	2012-12-20	2012-12-28	64	M	394402	52458162		SEVERE ANAEMIA	MEDI06A	0	128.83	41.86	170.69	Legal
211	2012-11-22	2012-12-26	16	F	416670	58416174		SEVERE ANAEMIA	MEDI06A	0	147.42	8.96	156.38	Legal
212	2012-12-08	2013-01-03	13	M	338510	65888527		HAERT FAILURE	MEDI07A	0	155.87	21.82	177.69	Legal
213	1-25-2013	1-30-2013	63	M	426024	16386982		HEART DISEASE	MEDI07A	0	155.87	13.2	169.07	Legal
214	1-21-2013	1-23-2013	53	M	232564	55451256		CCF	MEDI07A	0	155.87	15	170.87	Legal
215	2013-10-01	1-29-2013	39	F	127957	19597671		PLERAL EFFUSION	MEDI07A	0	155.87	81.21	237.08	Legal
216	2013-09-01	2013-12-01	60	F	408469	69626751		CONGESTIVE CARDIAC	MEDI07A	0	155.87	9.8	165.67	Legal
217	1-17-2013	1-19-2013	27	F	423995	82719059		CONGESTIVE CARDIAC FAILURE	MEDI07A	0	155.87	3.2	159.07	Legal
218	2012-12-16	2012-12-24	77	M	381667	68430832		CARDIAC FAILURE	MEDI07A	0	155.87	112.64	268.51	Fraudulent
219	2012-12-21	2012-12-24	44	M	420698	10487938		CARDIAC FAILURE	MEDI07A	0	155.87	24.6	180.47	Legal
220	2012-12-28	2013-01-01	27	F	421727	88531296		ORYANOPHOSPHATE POISONING	MEDI08A	0	95.55	8	103.55	Legal
221	2013-01-16	2013-01-22	13	F	424486	82030746		CEREBRAL MALARIA	MEDI09A	0	128.83	60.51	189.34	Fraudulent
222	2013-10-01	1-14-2013	27	F	423552	62945214		UNIARY TRACT INFECTION	MEDI13A	0	63.96	51.9	115.86	Legal
223	2013-01-03	2013-01-07	70	M	118399	16531125		CEREBROVASCULAR ACCIDENT	MEDI14A	0	128.18	43.37	171.55	Legal
224	2013-01-06	2013-01-25	55	F	423078	90025342		CEREBROVASCULAR ACCIDENT	MEDI14A	0	128.18	179.21	307.39	Fraudulent
225	2012-12-14	2012-12-30	69	F	419882	80621444		CEREBRO VASCULAR ACCIDENT	MEDI14A	0	128.18	333.41	461.59	Fraudulent
226	2012-12-25	2012-12-27	35	F	420171	30968375		SEVERE HYPERTENSION	MEDI14A	0	128.18	16.62	144.8	Legal
227	2012-12-16	2012-12-28	60	F	419008	84609748		CEREBRO VASCULAR ACCIDENT	MEDI14A	0	128.18	268.27	396.45	Fraudulent
228	2012-12-19	2012-12-27	67	F	420552	84192405		CEREBRO VASCULAR ACCIDENT	MEDI14A	0	104.65	134.12	238.77	Fraudulent
229	2012-12-19	2012-12-21	45	M	420468	16422350		CEREBRO VASCULAR ACCIDENT	MEDI14A	0	128.18	48.66	176.84	Legal
230	2012-12-20	2012-12-27	82	F	387954	44679240		CEREBRO VASCULAR ACCIDENT	MEDI14A	0	128.18	223.82	352	Fraudulent
231	2013-01-01	2013-01-06	21	F	226570	16538099		SICKLE CELL DISEASE	MEDI16A	0	123.11	31.17	154.28	Fraudulent
232	2013-01-03	2013-01-07	18	M	287520	58748433		SICKLE CELL DISEASE(CRISIS)	MEDI16A	0	123.11	52.9	176.01	Legal
233	2013-01-22	2013-01-25	16	F	372290	82938058		SICKLE CELL DISEASE	MEDI16A	0	123.11	19.06	142.17	Legal
234	1-16-2013	1-20-2013	15	F	177977	16483632		SICKLE CELL DISEASE	MEDI16A	0	123.11	97.77	220.88	Fraudulent
235	1-23-2013	1-29-2013	20	F	425695	68647912		SCD	MEDI16A	0	123.11	53.49	176.6	Legal
236	2013-09-01	2013-11-01	14	F	395566	15605453		SCD	MEDI16A	0	123.11	36.91	160.02	Legal
237	2013-04-01	2013-10-01	14	M	44586	16476035		SEVERE ANAMIA	MEDI16A	0	123.11	41.9	165.01	Legal
238	2013-01-01	2013-03-01	21	F	61694	16505227		SCD	MEDI16A	0	123.11	24	147.11	Legal
239	2012-12-27	2012-12-30	20	F	226570	16538099		SICKLE CELL DISEASES	MEDI16A	0	123.11	32.2	155.31	Fraudulent
240	2012-12-22	2012-12-24	27	M	420707	62890156		SICKLE CELL WITH VASCOCELUTIVE CRISIS	MEDI16A	0	123.11	9	132.11	Legal
241	2012-12-10	2012-12-13	28	F	419302	66988738		SICKLE CELL DISEASE	MEDI16A	0	123.11	26.06	149.17	Legal
242	2012-12-30	2013-01-05	81	M	422093	79413442		UPPER GI BLEEDING	MEDI17A	0	168.35	145.98	314.33	Fraudulent
243	2016-12-13	2013-01-02	41	F	419662	52096193		EXTENSIVE BURNS	MEDI18A	0	316.68	107.56	424.24	Fraudulent
244	2012-12-07	2012-12-24	73	F	414633	87174962		BURNS	MEDI18A	0	316.68	305.55	622.23	Fraudulent
245	2013-05-01	2013-08-01	64	F	423010	58607252		HYPERTENSION	MEDI20A	0	104.65	46.2	150.85	Legal
246	2012-12-22	2012-12-26	22	M	421048	60787021		CHRONIC RENSL FAILURE	MEDI20A	0	123.37	34.48	157.85	Legal
247	2013-01-25	2013-01-27	25	F	420929	28537829		ACUTE ASTHMATIC ATTSCK	MEDI22A	0	65.52	84.84	150.36	Fraudulent
248	2013-01-04	2013-01-10	80	M	301207	60869024		GASTROEUTERITIS	MEDI23A	0	88.92	48.1	137.02	Fraudulent
249	2013-01-22	2013-01-25	30	F	425420	72482467		GASTROEUTERITIS	MEDI23A	0	88.92	47.4	136.32	Fraudulent
250	2013-10-01	1-13-2013	36	F	423690	63860086		GASTRO-ENTERITIS	MEDI23A	0	88.92	5.32	94.24	Legal
251	2013-11-01	1-14-2013	73	F	338601	89896053		GASTROENTRITIS	MEDI23A	0	88.92	33.45	122.37	Fraudulent
252	2013-11-01	1-14-2013	27	F	423725	26700112		RESOIRATORY TRACT INFECTUIN	MEDI23A	0	88.92	54.6	143.52	Fraudulent
253	2013-12-01	1-15-2013	73	M	423978	66424747		MALARIA	MEDI23A	0	88.92	61.42	150.34	Fraudulent
254	2013-08-01	2013-11-01	39	F	423082	64052604		INTENSTINAL OBSTRACTION	MEDI23A	0	88.92	95.9	184.82	Fraudulent
255	2013-07-01	2013-09-01	29	F	418278	81185346		GASTROENTEITIS	MEDI23A	0	88.92	51.7	140.62	Fraudulent
256	2012-12-25	2012-12-27	55	M	421467	16510771		GASTICENTENTIS	MEDI23A	0	88.92	17.2	106.12	Legal
257	2012-12-17	2012-12-24	79	F	291092	16493125		GASTROENTRITIS	MEDI23A	0	88.92	57.7	146.62	Fraudulent
258	2012-12-23	2012-12-24	32	F	322226	82430090		GASTROENTRITIS	MEDI23A	0	88.92	16.9	105.82	Legal
259	2013-01-03	2013-01-07	59	M	422610	16416946		CHRONIC LIVER DISEASE	MEDI24A	0	103.09	68.57	171.66	Legal
260	2013-01-04	2013-01-08	53	M	402293	50531060		CHRONIC LIVER DISEASE	MEDI24A	0	103.09	42.95	146.04	Legal
261	2012-12-31	2013-01-02	72	M	422264	65597744		UPPER GASTRO INTESTINAL BLEEDING	MEDI25A	0	208.78	93.72	302.5	Fraudulent
262	2013-01-02	2013-01-04	53	M	422476	60617045		UPPER GASTRO INTESTINAL BLEEDING	MEDI25A	0	208.78	48.88	43.37	Legal
263	2013-09-01	1-17-2013	45	F	422812	89820952		ANAMIA	MEDI25A	0	208.78	1.5	210.28	Fraudulent
264	2012-12-26	2012-12-29	19	F	417149	75805137		INTESTINAL	MEDI25A	0	186.55	25.25	211.8	Legal
265	2013-05-01	2013-08-01	35	F	422955	75188670		PEPTIC ULCER DDISEASE	MEDI26A	0	38.09	133.06	171.15	Fraudulent
266	2013-01-25	2013-01-27	31	F	418690	57760699		MALARIA	MEDI28A	0	37.7	7.3	45	Legal
267	1-16-2013	1-20-2013	22	F	404436	88193131		MALARIA IN PREGNANCY	MEDI28A	0	37.7	48.25	85.95	Fraudulent
268	1-16-2013	1-19-2013	28	F	341283	60403560		MALARIA	MEDI28A	0	37.7	10.23	47.93	Legal
269	12-31-2002	2013-03-01	94	M	297103	76345738		MALARIA	MEDI28A	0	37.7	7.8	45.5	Legal
270	2012-12-12	2012-12-18	58	M	419432	75980713		MALARIA	MEDI28A	0	37.7	23.2	60.9	Legal
271	2012-12-13	2012-12-15	87	F	342179	61433597		MALARIA	MEDI28A	0	37.7	63.7	101.4	Fraudulent
272	2013-01-07	2013-01-09	18	M	390360	65577567		SEVERE MALARIA	MEDI29A	0	112.84	0.6	113.44	Legal
273	2013-01-07	2013-01-10	32	M	282384	67404459		MALARIA COMPLICATED	MEDI29A	0	112.84	12.1	124.94	Legal
274	2012-12-31	2013-01-07	29	M	422282	53393045		SEVERE MALARIA	MEDI29A	0	112.84	33	145.84	Legal
275	2013-01-22	2013-01-25	66	F	425197	84819811		SEVERE MALARIA	MEDI29A	0	112.84	0	112.84	Legal
276	2013-01-01	2013-01-18	67	F	417367	16393462		MALARIA COMPLICATED	MEDI29A	0	112.84	128.13	240.97	Fraudulent
277	1-21-2013	1-24-2013	26	M	425209	66284665		MALARIA COMPLICATED	MEDI29A	0	112.84	77.5	190.34	Legal
278	2013-10-01	1-14-2013	14	M	423701	67661864		SEVERE MALARIA	MEDI29A	0	112.84	19.8	132.64	Legal
279	2012-12-16	2012-12-27	33	M	412876	16407599		MALARIA COMPLICATED	MEDI29A	0	112.84	18.2	131.04	Legal
280	2013-01-03	2013-01-05	28	M	422664	74073081		ENTERIC FEVER	MEDI30A	0	148.46	25.2	173.66	Legal
281	2013-01-08	2013-01-10	43	M	422686	84265538		TYPHOID FEVER	MEDI30A	0	148.46	57.74	206.2	Legal
282	2013-08-01	1-13-2013	43	F	423046	56347682		ENTERIC FEVER	MEDI30A	0	148.46	47.7	196.16	Legal
283	2012-12-19	2012-12-31	89	M	420478	16518114		CEREBRO VASCULAR ACCIDENT	MEDI30A	0	148.46	160.46	308.92	Legal
284	2012-12-24	2012-12-31	51	M	421237	80430644		ENTERIC FEVER	MEDI30A	0	148.46	38.4	186.86	Legal
285	2012-11-03	2012-11-05	52	F	418171	56113951		PYELONEPHRITIS	MEDI30A	0	148.46	69.77	218.23	Legal
286	2012-11-30	2012-12-11	40	F	417820	64210345		PNEUMONIA	MEDI30A	0	180.7	23.8	204.5	Legal
287	1-21-2013	1-25-2013	57	M	297541	60743930		URINARY TRACT INFECTION	MEDI31A	0	63.96	18.45	82.41	Legal
288	12-31-2012	2013-05-01	41	F	419508	79478077		URINARY TRACT INFECTION	MEDI31A	0	89.7	206.53	296.23	Fraudulent
289	2012-12-18	2012-12-28	14	F	420321	16445926		CELLULITISOF LEFT ARM	MEDI31A	0	63.96	337.8	401.76	Fraudulent
290	2012-11-27	2012-11-30	33	F	277297	66687387		PEPTIC ULCER DISEASE	MEDI31A	0	63.96	14.6	78.56	Legal
291	2013-01-09	2013-01-11	57	F	423474	16421027		HYPERTENSION	MEDI32A	0	90.22	53	143.22	Legal
292	2012-12-28	2013-01-01	62	M	415281	85010254		HYPERTENSION	MEDI32A	0	90.22	0.54	90.76	Legal
293	2013-01-21	2013-01-24	45	F	167901	17625656		SEVERE HYPERTENSION	MEDI32A	0	90.22	36	126.22	Legal
294	2013-01-23	2013-01-27	40	F	425718	88494320		HYPERTENSION IN PREGNANCY	MEDI32A	0	37.7	0	37.7	Legal
295	2012-12-29	2013-01-03	53	M	397517	80822959		HYPERSIVE HEART	MEDI32A	0	90.22	0.42	90.64	Fraudulent
296	2012-12-30	2013-01-02	51	M	230510	16378344		CONGESTURE CARDIAE FAILURE	MEDI32A	0	6.16	77.86	84.02	Legal
297	2013-01-23	2013-01-25	45	F	351208	65141507		SEVERE HYPERTENSION	MEDI32A	0	90.22	105.9	196.12	Fraudulent
298	2013-01-15	2013-01-18	60	F	387187	85337894		HYPERTENSION	MEDI32A	0	90.22	39.2	129.42	Legal
299	2012-12-22	2012-12-29	48	F	420244	59675240		HYPERTENSION	MEDI32A	0	90.22	21.2	111.42	Legal
300	2013-08-01	1-23-2013	57	M	422375	64188124		DEEP VEIN THROMBOSIS	MEDI34A	0	133.64	259.2	392.84	Fraudulent
301	2013-10-01	1-24-2013	74	M	420593	51211834		DEEP VEIN THROMBOSIS	MEDI34A	0	133.64	220.48	354.12	Fraudulent
302	1-17-2013	1-21-2013	62	F	305260	62912594		DEEP VEIN THROMBOSIS	MEDI34A	0	133.64	46.1	179.74	Legal
303	2013-12-01	1-14-2013	76	M	172207	37654560		DIABETES MELLITUS SIMPLE	MEDI34A	0	104.65	19.95	124.6	Legal
304	1-25-2013	1-31-2013	58	F	161815	20692237		DEEP VEIN DIABETY	MEDI34A	0	133.64	254.35	387.99	Fraudulent
305	2013-05-01	1-14-2013	54	M	386358	16358174		HYPERTENSION	MEDI34A	0	133.64	48.9	182.54	Legal
306	2012-12-26	2012-12-28	76	F	421553	16373090		PASMONARY EMSOLISM	MEDI34A	0	133.64	95.2	228.84	Fraudulent
307	2012-12-16	2012-12-24	69	M	420003	39179246		DEEP VEIN THREMBASIS	MEDI34A	0	133.64	88.45	222.09	Legal
308	2012-11-16	2012-11-20	30	M	420034	81443327		PULMONARY EMBOLISM	MEDI34A	0	133.64	6	139.64	Legal
309	2012-12-27	2012-12-29	70	F	257693	58751537		HYPERTENSION	MEDI34A	0	133.64	132.1	265.74	Fraudulent
310	2012-11-01	2012-11-03	74	M	380608	44170199		CELLULITIS R. LEG	MEDI34A	0	63.96	83.5	147.46	Legal
311	2012-11-24	2012-11-27	58	M	416822	51028224		ALCOHOLIC LIVER	MEDI34A	0	103.09	14.1	117.19	Legal
312	2012-12-13	2012-12-07	62	F	418860	82430727		DISSEMINATE	MEDI34A	0	63.96	43.8	107.76	Legal
313	2012-11-26	2012-11-08	43	F	90725	16443423		CELLULITIS	MEDI34A	0	63.96	61.2	125.16	Legal
314	2012-12-27	2013-01-07	37	M	385903	86332460		CHRONIC SKIN ULCER	MEDI35A	0	264.94	39.02	303.96	Legal
315	2013-01-09	2013-01-25	64	F	399966	16447523		DIABETIC FOOT ULCER	MEDI35A	0	264.94	126.6	391.54	Fraudulent
316	2012-12-22	2012-12-28	40	F	416833	89175510		MULTIPLE ULCER BOTH LIMBS	MEDI35A	0	264.94	19.32	284.26	Fraudulent
317	2012-12-18	2012-12-21	38	F	416833	89175510		MULTIPLE ULCER BOTH LIMBS	MEDI35A	0	264.94	20	284.94	Fraudulent
318	2012-12-28	2013-01-02	43	M	421930	56415533		GASTROEUTERITIS	MEDI36A	0	109.96	44.4	154.36	Legal
319	2012-12-21	2013-01-08	55	M	398425	85943888		ALCOHOLISM	MEDI36A	0	96.33	26.15	122.48	Legal
320	2013-01-20	2013-01-25	45	F	422812	89820952		ALCOHOL INTOXIFICATION	MEDI36A	0	96.33	63.3	159.63	Fraudulent
321	2013-11-01	1-14-2013	55	M	423350	72273274		ALCOHOL WITHDRAWAL	MEDI36A	0	96.33	0.1	96.43	Legal
322	2013-01-03	2013-01-07	46	M	418553	59919834		HIV WASTING SYNDROME	MEDI38A	0	158.47	11.95	170.42	Legal
323	2013-01-01	2013-01-03	43	M	422292	82670624		IMMUNOSUPPRESSION	MEDI38A	0	158.47	53.94	212.41	Fraudulent
324	2012-12-28	2013-01-03	29	M	ART-4442	87179617		RETIO INFECTION	MEDI38A	0	158.47	8.45	166.92	Legal
325	2013-01-25	2013-01-28	14	F	425995	16460225		RETROVIRAL INFECTION	MEDI38A	0	158.47	98.02	256.49	Fraudulent
326	1-30-2013	2013-02-02	46	F	426613	66620083		IMMURO SUPPERSSION	MEDI38A	0	158.47	92.5	250.97	Fraudulent
327	2013-03-01	2013-11-01	57	F	422656	85501653		IMMUROSUPPRESION	MEDI38A	0	158.47	68.5	226.97	Fraudulent
328	12-21-2012	1-17-2013	60	M	420796	8937259		RETRO INFECTION	MEDI38A	0	158.47	124.8	283.27	Fraudulent
329	2012-12-26	2012-12-31	64	M	421555	48649452		RETREVIRAL HYPECTION SEPSIS	MEDI38A	0	158.47	71.06	229.53	Fraudulent
330	2013-01-21	2013-01-24	52	F	414369	78680773		THYRPTOXICOSIS/GOITRE	MEDIO1A	0	119.86	11.12	130.98	Legal
331	2012-12-28	2013-01-05	82	F	102083	16351075		DIABETIES MELLITUS COM	MEDIO3A	0	190.45	152.24	342.69	Fraudulent
332	2012-12-16	2012-12-24	60	F	158805	16506625		DIABETES MELITU TYPEII	MEDIO3A	0	190.45	447.76	638.21	Fraudulent
333	2012-12-31	2013-01-05	61	F	420534	44704193		ANAEMIA	MEDIO6A	0	128.83	12.36	141.19	Legal
334	2012-12-23	2012-12-28	67	M	176737	16381336		CONGESTIVE CARDIAC FAILURE	MEDIO7A	0	155.87	15.26	171.13	Legal
335	2012-12-26	2013-01-05	29	F	421537	16360552	GYNAELOGICAL LAPAROTOMY	ECTOPIC GESTATION	OBGY01A	0	292.5	114.08	406.58	Fraudulent
336	2013-01-03	2013-01-26	25	F	336305	55916924	LAPAROTOMY	RETAINED PRODUCT	OBGY01A	0	292.5	225.78	518.28	Fraudulent
337	2013-01-19	2013-01-24	12	F	425144	32058208	LAPAROTOMY	ECTOPIC PREGNANCY	OBGY01A	0	292.5	74.92	367.42	Fraudulent
338	2012-12-25	2012-12-31	62	F	420232	40419835	LAPAROTOMY	ENDOMETRIOSIS	OBGY01A	481	292.5	73.24	365.74	Fraudulent
339	2012-12-28	2012-12-31	29	F	421650	19597974	GYNAEOLOGICAL LAPARATOMY		OBGY01A	0	292.5	63.93	356.43	Legal
340	2012-12-28	2012-12-31	29	F	421710	16474159	LAPORATORY	RUPTARED ECTOPIC	OBGY01A	0	292.5	75.08	367.58	Fraudulent
341	2012-12-21	2012-12-28	30	F	420785	89369383	GYNAEOLOGICAL LAPARATOMY	LEAKING ECTOPIC GESTATION	OBGY01A	0	292.5	75.34	367.84	Fraudulent
342	2013-01-24	2013-01-27	26	F	425913	69022350		CHRONIC PELVIC PANI	OBGY02A	0	155.61	5.34	160.95	Legal
343	2013-01-25	2013-01-26	26	F	426043	52957608		PELVIC INFLAMATORY DISEASE	OBGY02A	0	155.61	12.7	168.31	Legal
344	2013-01-09	2013-01-13	37	F	395728	60865750	CULDOTOMY	PELVIC INFLAMMATORY	OBGY04A	0	78.39	100.18	178.57	Fraudulent
345	2013-01-18	2013-01-24	20	F	425063	70181051	CULDOCENTESIS	PELVIC INFLAMATORY DISEASE	OBGY04A	0	78.39	117.58	195.97	Fraudulent
346	2013-01-05	2013-01-07	33	F	422657	16536946	E.O.U	BLIGHTED OVUM	OBGY06A	0	72.8	64.46	137.26	Fraudulent
347	2013-01-03	2013-01-08	22	F	422687	86515065	E.O.U	RETAINED PLACENTA	OBGY06A	0	72.8	70.79	143.59	Fraudulent
348	2013-01-07	2013-01-09	15	F	311699	59445551	E.O.U	INCOMPLETE ABORTION	OBGY06A	0	72.8	14.8	87.6	Legal
349	2013-01-16	2013-01-19	21	F	424442	60975128	E.O.U	INCOMPLETE ABORTION	OBGY06A	0	72.8	8.9	81.7	Legal
350	2013-01-17	2013-01-19	33	F	405279	86463115	E.O.U	INCOMPLETE ABORTION	OBGY06A	0	72.8	0	72.8	Legal
351	2013-01-18	2013-01-20	27	F	424733	60630313	E.O.U	INCOMPLETE ABORTION	OBGY06A	0	72.8	63.26	136.06	Fraudulent
352	2013-01-17	2013-01-20	35	F	420862	89755005	E.O.U	UTERINE FIBROID	OBGY06A	0	231.92	71.26	303.18	Fraudulent
353	2013-01-18	2013-01-20	36	F	424981	26701832	E.O.U	INCOMPLETE ABORTION	OBGY06A	0	72.8	25.53	98.33	Legal
354	2013-01-17	2013-01-20	28	F	424647	74072755	E.O.U	INCOMPLETE ABORTION	OBGY06A	0	72.8	69.3	142.1	Fraudulent
355	2013-01-05	2013-01-07	47	F	390515	15790973	TOTAL ABDOMINAL HYSTERECTOMY	UTERINE FIBROID	OBGY06A	0	231.92	85.9	317.82	Fraudulent
356	2013-01-09	2013-01-14	50	F	416216	16435803	ABDOMINAL HYSTERECTOMY	UTERINE FIBROID	OBGY06A	0	231.92	139.5	371.42	Fraudulent
357	2013-01-23	2013-01-23	37	F	379573	83281889	E.O.U	INCOMPLETE ABORTION	OBGY06A	0	72.8	16.34	89.14	Legal
358	2013-01-21	2013-01-23	29	F	425267	61309221	E.O.U	INCOMPLETE ABORTION	OBGY06A	0	72.8	21.61	94.41	Legal
359	2013-01-23	2013-01-29	27	F	360679	72918465	E.O.U	INCOMPLETE ABORTION	OBGY06A	0	72.8	72.56	145.36	Fraudulent
360	2013-01-09	2013-01-14	34	F	399845	78467858	E.O.U	INCOMPLETE ABORTION	OBGY06A	0	72.8	140.44	213.24	Fraudulent
361	2013-01-23	2013-01-30	24	F	183046	61414130	E.O.U	RETAINED PLACENTA	OBGY06A	0	72.8	36.98	109.78	Fraudulent
362	2013-01-25	2013-01-30	29	F	426029	89564216	E.O.U	INEVIBLE ABORTION	OBGY06A	0	72.8	113.32	186.12	Fraudulent
363	2013-01-29	2013-01-31	31	F	426633	75967602	E.O.U	INCOMPLETE ABORTION	OBGY06A	0	72.8	19	91.8	Legal
364	2013-01-29	2013-01-31	36	F	426183	86305909	E.O.U	INCOMPLETE ABORTION	OBGY06A	0	72.8	0.96	73.76	Legal
365	2013-01-29	2013-01-31	40	F	426551	16447700	E.O.U	BLIGHTED OVUM	OBGY06A	0	72.8	11.56	84.36	Legal
366	2012-12-13	2012-12-20	37	F	419658	87890732	E.O.U	INEVITABLE ABORTION	OBGY06A	0	72.8	33.86	106.66	Fraudulent
367	2012-12-17	2012-12-20	36	F	268158	76313282	E.O.U	RETAINED PLACENTA	OBGY06A	0	72.8	40.9	113.7	Fraudulent
368	2012-12-30	2013-01-01	19	F	387473	69991605		PRAPERAL SEPSIS	OBGY09A	0	64.09	39.22	103.31	Fraudulent
369	2013-01-06	2013-01-07	39	F	380623	73699782		BLEEDING UTERINE FAROID	OBGY09A	0	64.09	1.16	65.25	Legal
370	2012-12-26	2013-01-07	33	F	408279	61273124		GESTATIONAL DIABETES	OBGY09A	0	64.09	56	120.09	Fraudulent
371	2013-01-05	2013-01-08	40	F	423017	84729269	ANTE NATAL	PREMATURE RUOTURE OF MEMBRENES	OBGY09A	0	64.09	0	64.09	Legal
372	2013-01-07	2013-01-08	22	F	423039	55473020		URENERY TRACT INFECTION	OBGY09A	27	64.09	3.66	67.75	Legal
373	2013-01-11	2013-01-12	25	F	408273	67373257		POST DATE	OBGY09A	0	64.09	0	64.09	Legal
374	2013-01-09	2013-01-12	35	F	421886	16386299		CHRONIC HYPERTENSION	OBGY09A	0	64.09	27.06	91.15	Fraudulent
375	2013-01-10	2013-01-14	49	F	413512	16374885		DEGENERATING UTERINE FIBROID	OBGY09A	0	64.09	11.9	75.99	Legal
376	2013-01-14	2013-01-17	31	F	405540	82668005		CHRONIC HYPERTENSION	OBGY09A	0	64.09	36.6	100.69	Fraudulent
377	2012-12-31	2013-01-03	34	F	355872	63290002		HYPEREMESIS GRAVIDARIUM	OBGY09A	0	64.09	17.05	81.14	Fraudulent
378	2012-12-31	2013-01-02	35	F	393275	85890604		GASTOEUTENTS IN CYESIS	OBGY09A	0	64.09	11.2	75.29	Legal
379	2012-12-31	2013-01-03	30	F	422180	66666200		ECTOPIC GESTATION	OBGY09A	0	64.09	33.6	97.69	Fraudulent
380	2012-12-28	2013-01-01	37	F	414517	87913400		HYPEREMESIS GRAVIDARIUM	OBGY09A	0	64.09	22.25	86.34	Fraudulent
381	2012-12-29	2013-01-01	32	F	221513	50384777		INCOMPLETE ABORTION	OBGY09A	0	64.09	4	68.09	Legal
382	2013-01-17	2013-01-21	24	F	423860	17445273		ECLAMPSIA	OBGY09A	0	64.09	143.16	207.25	Fraudulent
383	2013-01-11	2013-01-14	35	F	422696	89797739		MENORRHAGIA R/O ABORTION	OBGY09A	0	64.09	33.36	97.45	Fraudulent
384	2013-01-08	2013-01-14	22	F	423310	86479829		INTRA UTERINE DEATH	OBGY09A	0	64.09	43.18	107.27	Fraudulent
385	2012-12-29	2013-01-16	35	F	422023	68364250		CHRONIC HYPERTENSION IN CYESIS	OBGY09A	0	64.09	73.7	137.79	Fraudulent
386	2013-01-10	2013-01-15	35	F	420952	85413176		PREVIOUS CAESAREAN SECTION AT TERM	OBGY09A	0	64.09	0	64.09	Legal
387	2013-01-09	2013-01-15	18	F	419517	10465485		PREVIOUS CAESAREAN SECTION AT TERM	OBGY09A	0	64.09	0	64.09	Legal
388	2013-01-16	2013-01-16	20	F	421882	16757277		PREGNANCY INDUCED	OBGY09A	0	64.09	0	64.09	Legal
389	2013-01-09	2013-01-15	35	F	421873	88508880		CHRONIC HYPERTENSION	OBGY09A	0	64.09	29.88	93.97	Fraudulent
390	2013-01-11	2013-01-15	36	F	404454	82420373		PREVIOUS CAESAREAN SECTION AT TERM	OBGY09A	0	64.09	0	64.09	Legal
391	2013-01-14	2013-01-15	24	F	423900	82303294		POSRT PARTUM EDAMPSIA	OBGY09A	0	64.09	41.18	105.27	Fraudulent
392	2013-01-15	2013-01-17	31	F	419548	89126198		SEVERE PRE-ECLAMPSIA	OBGY09A	0	64.09	47.64	111.73	Fraudulent
393	2013-01-16	2013-01-17	35	F	424315	67124115		EXCESSIVE VOMITING IN PREGNANCY	OBGY09A	0	64.09	41.25	105.34	Fraudulent
394	2013-01-14	2013-01-16	30	F	417557	88737634		PLACENTA PRAAIG	OBGY09A	0	64.09	12.96	77.05	Legal
395	2013-01-14	2013-01-16	14	F	422832	45267773		MEDICAL INDUCTION	OBGY09A	0	64.09	12.1	76.19	Legal
396	2013-01-13	2013-01-15	38	F	40466	16408224		MALARIA IN CYESIS	OBGY09A	0	64.09	14.36	78.45	Legal
397	2013-01-11	2013-01-12	24	F	423676	62819758		APPENDICTIS,ECTOPIC	OBGY09A	0	64.09	13.2	77.29	Legal
398	2013-01-05	2013-01-14	34	F	355872	63290062		HYPEREMESIS	OBGY09A	0	64.09	65.51	129.6	Fraudulent
399	2013-01-09	2013-01-11	27	F	421642	55937620		PELVIC INFLAMMATORY DISEASE	OBGY09A	0	64.09	13.9	77.99	Legal
400	2013-01-02	2013-01-10	26	F	404781	80732077		PRE-ECLAMPSIA	OBGY09A	0	64.09	57.8	121.89	Fraudulent
401	2013-01-04	2013-01-06	32	F	408850	68365276		SEVERE PRE-ECLAMPSIA	OBGY09A	0	64.09	27	91.09	Fraudulent
402	2013-01-10	2013-01-11	29	F	401384	84613096		PRETERM LABOUR	OBGY09A	0	64.09	35.8	99.89	Fraudulent
403	2013-01-02	2013-01-07	40	F	410235	35349653		UTERINE FIBROID	OBGY09A	0	64.09	27	91.09	Fraudulent
404	2013-01-02	2013-01-06	29	F	422496	88585288		INEVITABLE ABORTION	OBGY09A	0	64.09	21.3	85.39	Fraudulent
405	2013-01-03	2013-01-06	29	F	414520	87912945		PREGNANCY WITH RED DEGENERATION OF FIBROIDS	OBGY09A	0	64.09	17.06	81.15	Fraudulent
406	2013-01-16	2013-01-18	36	F	344459	76599283		HYPEREMESIS GRAVIDARIUM	OBGY09A	0	64.09	51.45	115.54	Fraudulent
407	2013-01-07	2013-01-19	68	F	41782	16506086		URINARY TRACT INFECTION	OBGY09A	0	64.09	44.36	108.45	Fraudulent
408	2013-01-15	2013-01-20	26	F	424405	89355188		SEVERE PRE-ECLAMPSIA	OBGY09A	0	64.09	18.66	82.75	Fraudulent
409	2013-01-15	2013-01-18	19	F	424411	82149410		INEVITABLE ABORTION	OBGY09A	0	64.09	30.6	94.69	Fraudulent
410	2013-01-18	2013-01-19	32	F	420965	80471444		CYESIS WITH LOW LYING PLACENTA	OBGY09A	0	64.09	16.6	80.69	Fraudulent
411	2013-01-14	2013-01-23	24	F	413143	82785404		TWIN GESTATION	OBGY09A	0	64.09	86.91	151	Fraudulent
412	2013-01-21	2013-01-23	36	F	408682	16380173		PREVIOUS C/S WITH PRETERM LABOUR	OBGY09A	0	64.09	3.4	67.49	Legal
413	2013-01-22	2013-01-23	35	F	237372	56183440		RUPTURE OF MEMBRANES	OBGY09A	0	64.09	14.64	78.73	Legal
414	2013-01-22	2013-01-24	23	F	425258	19949459		PELVIC INFLAMATORY DISEASE	OBGY09A	0	64.09	16	80.09	Fraudulent
415	2013-01-27	2013-01-31	31	F	399081	23670661		IMMINENT PRE-ECLAMPSIA	OBGY09A	0	64.09	44.63	108.72	Fraudulent
416	2013-01-30	2013-01-31	32	F	381923	83357114	RETENSION OF URINE	RETENTION OF URINE	OBGY09A	0	64.09	17.26	81.35	Fraudulent
417	2013-01-28	2013-01-30	28	F	113022	63542959		THREATENED ABORTION	OBGY09A	0	64.09	65.8	129.89	Fraudulent
418	2013-01-27	2013-01-30	27	F	426176	52852800		HYPERMESIS GRAVIDAUM	OBGY09A	0	64.09	15.6	79.69	Fraudulent
419	2013-01-28	2013-01-29	35	F	355872	63290002		HYPERMESIS GRAVIDAUM	OBGY09A	0	64.09	12.6	76.69	Fraudulent
420	2013-01-23	2013-01-25	27	F	425710	47930326		HYPERMESIS GRAVIDAUM	OBGY09A	0	64.09	48.5	112.59	Fraudulent
421	2013-01-25	2013-01-26	30	F	424739	90363744		MODERATE ANAENIA	OBGY09A	0	64.09	1.26	65.35	Legal
422	2013-01-27	2013-01-29	34	F	418812	65752818		SEVERE PREGNANCY	OBGY09A	0	64.09	42.42	106.51	Fraudulent
423	2013-01-24	2013-01-26	36	F	364278	75795450		MOLAR PREGNANCY	OBGY09A	0	64.09	52.06	116.15	Fraudulent
424	2013-01-23	2013-01-26	40	F	119568	52848002		CYESIS WITH HASTRITIS	OBGY09A	0	64.09	105.26	169.35	Fraudulent
425	2013-01-23	2013-01-26	21	F	425694	87455240		SWOLLEN VULVA	OBGY09A	0	64.09	59.76	123.85	Fraudulent
426	2013-01-21	2013-01-27	34	F	370903	16426363		PREMATURE RUPTURE OF MEMBRANE	OBGY09A	0	64.09	5.2	69.29	Legal
427	2013-01-19	2013-01-25	17	F	425150	85691675		MALARIA IN CYESIS	OBGY09A	0	64.09	39.98	104.07	Fraudulent
428	2013-01-24	2013-01-27	29	F	408242	86640598		ANTE PARTUM HAEMORRAGE	OBGY09A	0	64.09	32.14	96.23	Fraudulent
429	2013-01-17	2013-01-25	28	F	421644	79958850		HYPEREMESIS GRAVIDARIUM	OBGY09A	0	64.09	66.58	130.67	Fraudulent
430	2012-12-16	2012-12-19	25	F	416440	80429793		HYPEREMESIS GRAVIDANIUM	OBGY09A	0	64.09	25.56	89.65	Fraudulent
431	2012-12-28	2012-12-31	29	F	420912	66039998		MALARIA IN CYESIS	OBGY09A	0	64.09	31.46	95.55	Fraudulent
432	2012-12-28	2012-12-31	40	F	421722	87454977		REPIRATORY TRACT INFECTION	OBGY09A	0	64.09	41.28	105.37	Fraudulent
433	2012-12-18	2012-12-24	46	F	394645	16391406		MENINHAPIS UTTERINE	OBGY09A	0	64.09	19.26	83.35	Fraudulent
434	2012-11-28	2012-12-31	22	F	415553	88191279		RESPIRATORY TRUCT INFECTION	OBGY09A	0	64.09	41	105.09	Fraudulent
435	2012-12-21	2012-12-23	36	F	344459	76599283		HYPEREMESIS	OBGY09A	0	6.16	20.4	26.56	Fraudulent
436	2012-12-18	2012-12-19	37	M	420226	79086315		UNBILICAL HERMA	OBGY09A	0	64.09	28.1	92.19	Fraudulent
437	2012-10-30	2012-11-02	25	F	413192	83722011		EDAMPSIA	OBGY09A	0	64.09	51.88	115.97	Fraudulent
438	2012-11-30	2012-12-05	71	M	417855	88564534		RISE IN BLOOD PRESSURE	OBGY09A	0	64.09	41.1	105.19	Fraudulent
439	2012-12-14	2012-12-18	33	F	419851	85603962		BLEEDING ULERINE FIBROIDS	OBGY09A	0	64.09	0.96	65.05	Legal
440	2012-12-30	2012-12-02	28	F	417410	57670073		PRE-EDAMPSIA	OBGY09A	0	64.09	7.15	71.24	Legal
441	2012-11-07	2012-12-01	32	F	405540	82668005	ANTE NATAL	CHRONIC HYPERTENSION	OBGY09A	0	64.09	18.6	82.69	Fraudulent
442	2012-11-27	2012-12-04	20	F	417366	76342980		PELVIC INFLAMMATORY DISEASE	OBGY09A	0	64.09	17.24	81.33	Fraudulent
443	2012-11-03	2012-12-06	30	F	417783	86408791		MALARIA IN CYESIS	OBGY09A	0	64.09	19.3	83.39	Fraudulent
444	2012-12-20	2012-12-25	27	F	415756	87925324		HYPEREMESIS GRAVIDARIUM	OBGY09A	0	64.09	42.12	106.21	Fraudulent
445	2012-12-16	2012-12-17	25	F	420073	84489678		MALARIA IN CYESIS	OBGY09A	0	64.09	4.42	68.51	Legal
446	2012-12-23	2012-12-25	23	F	421196	65574885		MALARIA	OBGY09A	0	64.09	8.4	72.49	Legal
447	2012-12-28	2012-12-31	23	F	250000	56245569		LATENT PHASE OF LABOUR	OBGY09A	0	64.09	8.2	72.29	Legal
448	2012-12-03	2012-12-17	33	F	418315	60257170		ANTWPORTUM HAEMORHEGE	OBGY09A	0	64.09	0.96	65.05	Legal
449	2012-12-12	2012-12-17	37	F	418689	66937747		PREGNANCY INDUCED HYPERTENSION	OBGY09A	0	64.09	44.6	108.69	Fraudulent
450	2012-12-17	2012-12-18	38	F	411464	57299669		THREATENED ABORTION	OBGY09A	0	64.09	15.25	79.34	Fraudulent
451	2012-12-15	2012-12-17	25	F	418650	16487060		MALARIA IN CYESIS	OBGY09A	0	64.09	48.72	112.81	Fraudulent
452	2012-12-13	2012-12-15	39	F	341023	68511708		URENERY TRACT INFECTION	OBGY09A	0	64.09	66	130.09	Fraudulent
453	2012-12-18	2012-12-20	35	F	414519	85694476		HYPEREMESIS GRAVIDARIUM	OBGY09A	0	64.09	8	72.09	Legal
454	2012-12-15	2012-12-18	36	F	390780	16416215		INCOMPLETE ABORTION	OBGY09A	0	64.09	13	77.09	Legal
455	2012-12-29	2012-12-31	43	M	386508	75179341		INTUSSCEPTION	OBGY09A	0	64.09	60.2	124.29	Fraudulent
456	2012-10-19	2012-10-29	17	F	411709	49968138		PERITONITIS	OBGY09A	0	64.09	122.73	186.82	Fraudulent
457	2012-12-30	2013-01-12	39	F	389090	81080137	PELVIC FLOOR REPAIRS	CERVICAL LESION	OBGY13A	0	217.23	223.18	440.41	Fraudulent
458	2013-01-06	2013-01-15	26	F	423043	69794586	HYSTEROSCOPY	BLEEDING UTERINE FIBROIDS	OBGY26A	0	127.66	7.36	135.02	Legal
459	2012-12-21	2012-12-29	38	F	420719	86277259	HYSTEROSCOPY	BLEEDING ULERINE FIBROIDS	OBGY26A	0	127.66	1.16	128.82	Legal
460	2012-12-28	2013-01-02	27	F	421821	83249062	DESTRUCTIVE DELIVERY	INTRA UTRINE FOETAL DEATH	OBGY31A	0	116.87	13.56	130.43	Legal
461	2013-01-04	2013-01-10	33	F	422841	18269426	DESTRUCTIVE DELIVERY	INTRA UTERINE FOETAL DEATH	OBGY31A	0	116.47	64.88	181.35	Fraudulent
462	2012-12-25	2012-12-28	19	F	394114	16441011	DESTRUCTIVE DELIVERY	BIG ABDOMEN WITH IUFD	OBGY31A	0	116.87	77.36	194.23	Fraudulent
463	2012-12-27	2012-12-03	26	F	417298	84219707		INTRA UTERINE FETAL DEATH	OBGY31A	0	116.87	12.06	128.93	Legal
464	2012-12-30	2013-01-03	30	F	389808	51950831	CEASAREAN SECTION	ANTI PARTUM HAEMARRAGE	OBGY32A	27	231.14	63.07	294.21	Legal
465	2012-12-30	2013-01-03	24	F	422054	57109267	CEASAREAN SECTION	PRE-EDAMPSIA	OBGY32A	27	231.14	100.36	331.5	Fraudulent
466	2012-12-31	2013-01-03	24	F	420385	63157232	CEASAREAN SECTION	PROLONG LABOUR	OBGY32A	27	231.14	65.09	296.23	Legal
467	2012-12-29	2013-01-03	33	F	398896	82558178	CEASAREAN SECTION	CEPHALO PELVIC DISPROPORRIO	OBGY32A	0	231.14	89.73	320.87	Fraudulent
468	2012-12-30	2013-01-03	25	F	422063	87585633		ACUTE PHYELONEPHUTIN	OBGY32A	0	64.09	33.4	97.49	Legal
469	2012-12-31	2013-01-03	27	F	422096	52156123	CEASAREAN SECTION	PREVIOUS CAESAREAN SECTION	OBGY32A	0	231.14	83.98	315.12	Fraudulent
470	2012-12-28	2013-01-03	41	F	412329	35965107	CEASAREAN SECTION	PREVIOUS CAESAREAN SECTION	OBGY32A	0	231.14	77.82	308.96	Legal
471	2012-12-30	2013-01-03	38	F	391872	82707707	CAESAREAN SECTION	FAILURE TO PROGRESS	OBGY32A	0	231.14	64.28	295.42	Legal
472	2013-01-01	2013-01-04	31	F	390866	61422387	CAESAREAN SECTION	ANTI PARTUM HAEMORRHAGE	OBGY32A	27	231.14	72.58	303.72	Legal
473	2012-12-31	2013-01-03	27	F	422099	72031036	CAESAREAN SECTION	PROLONGED HYPERTONSION	OBGY32A	0	231.14	92.15	323.29	Fraudulent
474	2013-01-02	2013-01-07	34	F	204339	52852319	CAESAREAN SECTION	SEVERE PRE- EDAMPSIA	OBGY32A	0	231.14	88.26	319.4	Fraudulent
475	2013-01-04	2013-01-07	29	F	396156	84618015	CAESAREAN SECTION	PRIMIPIC BREECH	OBGY32A	0	231.14	63.68	294.82	Legal
476	2013-01-03	2013-01-07	32	F	418660	16519246	CAESAREAN SECTION	PREVIOUS CAESAREAN SECTION	OBGY32A	0	231.14	152.28	383.42	Fraudulent
477	2013-01-04	2013-01-07	33	F	422742	83460758	CAESAREAN SECTION	FETAL DISTRESS	OBGY32A	0	231.14	82.32	313.46	Fraudulent
478	2013-01-05	2013-01-10	35	F	422976	80279382	CAESAREAN SECTION	FETAL DISTRESS	OBGY32A	0	231.14	66.58	297.72	Legal
479	2013-01-03	2013-01-08	34	F	379534	60969443	CAESAREAN SECTION	SEVERE PRE- EDAMPSIA	OBGY32A	0	231.14	111.3	342.44	Fraudulent
480	2013-01-04	2013-01-09	32	F	242330	36989680	CAESAREAN SECTION	PREVIOUS CAESAREAN SECTION	OBGY32A	0	231.14	89.52	320.66	Fraudulent
481	2013-01-03	2013-01-06	21	F	419526	84647066	CAESAREAN SECTION	FAILURE TO PROGRESS	OBGY32A	0	231.14	102.81	333.95	Fraudulent
482	2012-12-29	2013-01-01	30	F	421957	83219696	CAESAREAN SECTION	DELAYED LABOUR	OBGY32A	0	231.14	93.28	324.42	Fraudulent
483	2012-12-29	2013-01-01	28	F	422021	87398214	CAESAREAN SECTION	PREVIOUS CAESAREAN SECTION	OBGY32A	0	231.14	85.64	316.78	Fraudulent
484	2012-12-31	2013-01-05	28	F	422105	71553424	CAESAREAN SECTION	DELAYED LABOUR	OBGY32A	0	231.14	68.68	299.82	Legal
485	2013-01-01	2013-01-06	29	F	422313	82390542	CAESAREAN SECTION	CEPHALO PELVIC DISPROPORTION	OBGY32A	0	231.14	67.43	298.57	Legal
486	2013-01-02	2013-01-06	57	F	422373	61383110	CAESAREAN SECTION	EDAMPSIA	OBGY32A	0	231.14	171.29	402.43	Fraudulent
487	2013-01-02	2013-01-06	39	F	341023	68511708	CAESAREAN SECTION	PREVIOUS CAESAREAN SECTION	OBGY32A	0	231.14	81.46	312.6	Fraudulent
488	2013-01-11	2013-01-12	33	F	389844	16387017		POST DATE	OBGY32A	0	64.09	0	64.09	Fraudulent
489	2013-01-17	2013-01-22	20	F	174935	48803378	CAESAREAN SECTION	PREDAMPSIA	OBGY32A	0	231.14	89.8	320.94	Fraudulent
490	2013-01-17	2013-01-22	26	F	423899	84989392	CAESAREAN SECTION	PROLONG PREGNANCY	OBGY32A	0	231.14	65.72	296.86	Legal
491	2013-01-04	2013-01-11	30	F	396173	83106390	CAESAREAN SECTION	TWIN GESTATION	OBGY32A	0	231.14	76.28	307.42	Legal
492	2013-01-16	2013-01-21	34	F	389844	16387017	CAESAREAN SECTION	POST DATE	OBGY32A	0	231.14	127.4	358.54	Fraudulent
493	2013-01-17	2013-01-21	31	F	417531	68275031	CAESAREAN SECTION	PREVIOUS CAESAREAN SECTION	OBGY32A	0	231.14	65.72	296.86	Legal
494	2013-01-17	2013-01-21	35	F	424929	63539518	CAESAREAN SECTION	FAILURE TO PROGRESS	OBGY32A	0	231.14	82.87	314.01	Fraudulent
495	2013-01-19	2013-01-21	22	F	424977	59389280	CAESAREAN SECTION	FETAL DISTRESS	OBGY32A	0	231.14	106.46	337.6	Fraudulent
496	2012-12-31	2013-01-04	24	F	390870	82710119	CAESAREAN SECTION	PREVIOUS CAESAREAN SECTION	OBGY32A	0	231.14	60.68	291.82	Legal
497	2013-01-29	2013-01-04	35	F	421932	89173189	CAESAREAN SECTION	ANC POSTAUM HAEMORRHAGE	OBGY32A	0	231.14	83.92	315.06	Fraudulent
498	2013-01-07	2013-01-11	36	F	307740	61401113	CAESAREAN SECTION	LUSCSO/A3 PREVIOUS	OBGY32A	0	231.14	76.08	307.22	Legal
499	2013-01-09	2013-01-11	33	F	279010	59811836	CAESAREAN SECTION	LUSCSO/A1PREVIOUS	OBGY32A	0	231.14	130	361.14	Fraudulent
500	2013-01-07	2013-01-11	37	F	421405	55019630	CAESAREAN SECTION	O/A ABDOMEN+PREVIOUS C/S IN LABOUR	OBGY32A	0	231.14	94.52	325.66	Fraudulent
501	2013-01-06	2013-01-14	20	F	423031	68666651	CAESAREAN SECTION	PREVIOUS CAESAREAN SECTION	OBGY32A	0	231.14	77.82	308.96	Legal
502	2013-01-08	2013-01-12	24	F	400500	84581638	CAESAREAN SECTION	PREVIOUS CAESAREAN SECTION	OBGY32A	0	231.14	38.4	269.54	Legal
503	2013-01-14	2013-01-17	32	F	413876	83396817	CAESAREAN SECTION	PREVIOUS CAESAREAN SECTION	OBGY32A	0	231.14	36.8	267.94	Legal
504	2013-01-10	2013-01-15	28	F	394304	87424373	CAESAREAN SECTION	SEVERE PRE-ECLAMPSIA	OBGY32A	0	231.14	139.22	370.36	Fraudulent
505	2013-01-10	2013-01-15	20	F	360405	70853325	CAESAREAN SECTION	SEVERE PRE-ECLAMPSIA	OBGY32A	0	231.14	80.03	311.17	Legal
506	2013-01-10	2013-01-15	26	F	423548	82558497	CAESAREAN SECTION	CEPHALIC PELVIC	OBGY32A	0	231.14	69.84	300.98	Legal
507	2013-01-10	2013-01-15	37	F	397100	83889224	CAESAREAN SECTION	LUSCS O/A CEPHALO PELVIC	OBGY32A	0	231.14	76.28	307.42	Legal
508	2013-01-11	2013-01-16	36	F	401931	52656253	CAESAREAN SECTION	SEVERE PRE-ECLAMPSIA	OBGY32A	0	231.14	99.27	330.41	Fraudulent
509	2013-01-01	2013-01-13	36	F	422296	61196662	CAESAREAN SECTION	POST PARTUM HAEMORMAGE	OBGY32A	0	231.14	121	352.14	Fraudulent
510	2013-01-03	2013-01-09	28	F	394087	16444155	CAESAREAN SECTION	SICKLE CELL DISEASE	OBGY32A	0	231.14	86.78	317.92	Fraudulent
511	2012-12-21	2012-12-24	27	F	357484	54548119	CEASAREAN SECTION	LOWER UTERINE	OBGY32A	0	231.14	87.42	318.56	Fraudulent
512	2013-01-03	2013-01-03	24	F	422504	86708611	SPONTANEOUS VAGINAL DELIVERY	DELIVERY	OBGY33A	0	50.96	7	57.96	Legal
513	2013-01-03	2013-01-03	29	F	397074	82601548	SPONTANEOUS VAGINAL DELIVERY	DELIVERY	OBGY33A	81	50.96	5	55.96	Legal
514	2013-01-02	2013-01-03	28	F	405529	85898494	SPONTANEOUS VAGINAL DELIVERY	DELIVERY	OBGY33A	81	50.96	5	55.96	Legal
515	2013-01-02	2013-01-03	20	F	390871	82702195	SPONTANEOUS VAGINAL DELIVERY	DELIVERY	OBGY33A	81	50.96	7	57.96	Legal
516	2013-01-02	2013-01-03	30	F	246418	55735391	SPONTANEOUS VAGINAL DELIVERY	DELIVERY	OBGY33A	81	50.96	3	53.96	Legal
517	2013-01-03	2013-01-03	29	F	404773	85633072	SPONTANEOUS VAGINAL DELIVERY	DELIVERY	OBGY33A	81	50.96	7.45	58.41	Legal
518	2013-01-02	2013-01-03	17	F	394097	83220113	SPONTANEOUS VAGINAL DELIVERY	DELIVERY	OBGY33A	81	50.96	5	55.96	Legal
519	2013-01-02	2013-01-03	28	F	287034	77901868	SPONTANEOUS VAGINAL DELIVERY	DELIVERY	OBGY33A	81	50.96	5	55.96	Legal
520	2013-01-03	2013-01-04	27	F	413374	82255648	SPONTANEOUS VAGINAL DELIVERY	DELIVERY	OBGY33A	81	50.96	4	54.96	Legal
521	2013-01-02	2013-01-03	16	F	408868	38715301	SPONTANEOUS VAGINAL DELIVERY	DELIVERY	OBGY33A	81	50.96	5	55.96	Legal
522	2013-01-02	2013-01-03	26	F	244207	66045238	SPONTANEOUS VAGINAL DELIVERY	DELIVERY	OBGY33A	81	50.96	2	52.96	Legal
523	2013-01-02	2013-01-03	33	F	422495	84987367	SPONTANEOUS VAGINAL DELIVERY	DELIVERY	OBGY33A	81	50.96	3	53.96	Legal
524	2013-01-02	2013-01-03	29	F	259833	82830060	SPONTANEOUS VAGINAL DELIVERY	DELIVERY	OBGY33A	81	50.96	4	54.96	Legal
525	2013-01-02	2013-01-03	23	F	422501	62372236	SPONTANEOUS VAGINAL DELIVERY	DELIVERY	OBGY33A	81	50.96	3	53.96	Legal
526	2013-01-01	2013-01-02	30	F	414590	64199168	SPONTANEOUS VAGINAL DELIVERY	DELIVERY	OBGY33A	81	50.96	5	55.96	Legal
527	2013-01-01	2013-01-02	26	F	398909	76565682	SPONTANEOUS VAGINAL DELIVERY	DELIVERY	OBGY33A	81	50.96	9.51	60.47	Legal
528	2013-01-01	2013-01-02	22	F	396142	82452686	SPONTANEOUS VAGINAL DELIVERY	DELIVERY	OBGY33A	81	50.96	5	55.96	Legal
529	2012-12-31	2013-01-01	39	F	397144	35345477	SPONTANEOUS VAGINAL DELIVERY	DELIVERY	OBGY33A	81	50.96	47.68	98.64	Fraudulent
530	2012-12-31	2013-01-01	29	F	397109	36698480	SPONTANEOUS VAGINAL DELIVERY	DELIVERY	OBGY33A	81	50.96	4	54.96	Legal
531	2013-01-01	2013-01-01	27	F	421920	85598190	SPONTANEOUS VAGINAL DELIVERY	DELIVERY	OBGY33A	81	50.96	4	54.96	Legal
532	2012-12-31	2013-01-01	29	F	388331	15292037	SPONTANEOUS VAGINAL DELIVERY	DELIVERY	OBGY33A	81	50.96	6	56.96	Legal
533	2012-12-31	2013-01-01	29	F	422177	85107577	SPONTANEOUS VAGINAL DELIVERY	DELIVERY	OBGY33A	81	50.96	8	58.96	Legal
534	2012-12-31	2013-01-01	22	F	405598	86486779	SPONTANEOUS VAGINAL DELIVERY	DELIVERY	OBGY33A	81	50.96	5.2	56.16	Legal
535	2012-12-31	2013-01-01	25	F	405547	74831065	SPONTANEOUS VAGINAL DELIVERY	DELIVERY	OBGY33A	81	50.96	5	55.96	Legal
536	2012-12-31	2013-01-01	26	F	360855	59286316	SPONTANEOUS VAGINAL DELIVERY	DELIVERY	OBGY33A	81	50.96	13	63.96	Legal
537	2012-12-30	2013-01-01	21	F	422295	86951768	SPONTANEOUS VAGINAL DELIVERY	DELIVERY	OBGY33A	81	50.96	2	52.96	Legal
538	2013-01-01	2013-01-01	29	F	422253	84244069	SPONTANEOUS VAGINAL DELIVERY	DELIVERY	OBGY33A	81	50.96	25.74	76.7	Legal
539	2013-01-01	2013-01-01	14	F	422098	65986135	SPONTANEOUS VAGINAL DELIVERY	DELIVERY	OBGY33A	81	50.96	8	58.96	Legal
540	2013-01-01	2013-01-01	27	F	389871	60259767	SPONTANEOUS VAGINAL DELIVERY	DELIVERY	OBGY33A	81	50.96	0	50.96	Legal
541	2012-12-29	2013-01-01	38	F	421962	83673968	SPONTANEOUS VAGINAL DELIVERY	DELIVERY	OBGY33A	81	50.96	6	56.96	Legal
542	2012-12-31	2013-01-01	29	F	422109	65474892	SPONTANEOUS VAGINAL DELIVERY	DELIVERY	OBGY33A	81	50.96	10	60.96	Legal
543	2012-12-31	2013-01-01	37	F	175945	75669274	SPONTANEOUS VAGINAL DELIVERY	DELIVERY	OBGY33A	81	50.96	4	54.96	Legal
544	2012-12-28	2013-01-01	39	F	421807	87927375	SPONTANEOUS VAGINAL DELIVERY	DELIVERY	OBGY33A	81	50.96	98.76	149.72	Fraudulent
545	2013-01-01	2013-01-01	23	F	422036	65053596	SPONTANEOUS VAGINAL DELIVERY	DELIVERY	OBGY33A	81	50.96	8	58.96	Legal
546	2013-01-02	2013-01-02	29	F	422273	16511255	SPONTANEOUS VAGINAL DELIVERY	DELIVERY	OBGY33A	81	50.96	5	55.96	Legal
547	2012-12-29	2013-01-02	30	F	407019	15376007	SPONTANEOUS VAGINAL DELIVERY	DELIVERY	OBGY33A	81	50.96	1	51.96	Legal
548	2012-12-30	2013-01-02	25	F	422030	58140124	SPONTANEOUS VAGINAL DELIVERY	DELIVERY	OBGY33A	81	50.96	9	59.96	Legal
549	2013-01-02	2013-01-02	30	F	396171	16358943	SPONTANEOUS VAGINAL DELIVERY	DELIVERY	OBGY33A	81	50.96	7	57.96	Legal
550	2013-01-01	2013-01-02	34	F	422309	83263638	SPONTANEOUS VAGINAL DELIVERY	DELIVERY	OBGY33A	81	50.96	6	56.96	Legal
551	2013-01-02	2013-01-02	27	F	397155	40391813	SPONTANEOUS VAGINAL DELIVERY	DELIVERY	OBGY33A	81	50.96	9	59.96	Legal
552	2013-01-01	2013-01-02	28	F	401394	63311254	SPONTANEOUS VAGINAL DELIVERY	DELIVERY	OBGY33A	81	50.96	1	51.96	Legal
553	2013-01-01	2013-01-02	37	F	422332	84442192	SPONTANEOUS VAGINAL DELIVERY	DELIVERY	OBGY33A	81	50.96	4	54.96	Legal
554	2012-12-30	2013-01-01	17	F	422092	87991977	SPONTANEOUS VAGINAL DELIVERY	DELIVERY	OBGY33A	81	50.96	9	59.96	Legal
555	2012-12-30	2013-01-01	27	F	397138	85339125	SPONTANEOUS VAGINAL DELIVERY	DELIVERY	OBGY33A	81	50.96	7	57.96	Legal
556	2012-12-31	2013-01-01	36	F	422072	64196353	SPONTANEOUS VAGINAL DELIVERY	DELIVERY	OBGY33A	81	50.96	7	57.96	Legal
557	2013-01-01	2013-01-03	15	F	422684	87719171	SPONTANEOUS VAGINAL DELIVERY	DELIVERY	OBGY33A	81	50.96	2	52.96	Legal
558	2012-12-31	2013-01-01	28	F	387045	60256511	SPONTANEOUS VAGINAL DELIVERY	DELIVERY	OBGY33A	81	50.96	8	58.96	Legal
559	2012-12-31	2013-01-01	18	F	394136	83876850	SPONTANEOUS VAGINAL DELIVERY	DELIVERY	OBGY33A	81	50.96	8	58.96	Legal
560	2013-01-04	2013-01-04	40	F	152133	16497401	SPONTANEOUS VAGINAL DELIVERY	DELIVERY	OBGY33A	81	50.96	5	55.96	Legal
561	2013-01-02	2013-01-04	26	F	411430	87149127	SPONTANEOUS VAGINAL DELIVERY	DELIVERY	OBGY33A	81	50.96	7	57.96	Legal
562	2013-01-03	2013-01-04	27	F	422227	62832961	SPONTANEOUS VAGINAL DELIVERY	DELIVERY	OBGY33A	81	50.96	5	55.96	Legal
563	2013-01-03	2013-01-04	37	F	401958	84764025	SPONTANEOUS VAGINAL DELIVERY	DELIVERY	OBGY33A	81	50.96	4.04	55	Legal
564	2013-01-03	2013-01-04	37	F	390817	82677688	SPONTANEOUS VAGINAL DELIVERY	DELIVERY	OBGY33A	81	50.96	8	58.96	Legal
565	2013-01-04	2013-01-04	39	F	390819	82677175	SPONTANEOUS VAGINAL DELIVERY	DELIVERY	OBGY33A	81	50.96	5.04	56	Legal
566	2013-01-05	2013-01-07	26	F	214053	83337369	SPONTANEOUS VAGINAL DELIVERY	DELIVERY	OBGY33A	81	50.96	8	58.96	Legal
567	2013-01-06	2013-01-07	26	F	408921	81994960	SPONTANEOUS VAGINAL DELIVERY	DELIVERY	OBGY33A	81	50.96	4	54.96	Legal
568	2013-01-05	2013-01-05	27	F	401880	87468188	SPONTANEOUS VAGINAL DELIVERY	DELIVERY	OBGY33A	81	62.66	11.6	74.26	Legal
569	2013-01-06	2013-01-07	32	F	423055	84849302	SPONTANEOUS VAGINAL DELIVERY	DELIVERY	OBGY33A	81	50.96	0	50.96	Legal
570	2013-01-03	2013-01-05	30	F	386033	61294116	SPONTANEOUS VAGINAL DELIVERY	DELIVERY	OBGY33A	81	50.96	23.92	74.88	Legal
571	2013-01-04	2013-01-05	32	F	422838	87576115	SPONTANEOUS VAGINAL DELIVERY	DELIVERY	OBGY33A	81	50.96	8	58.96	Legal
572	2013-01-04	2013-01-05	19	F	406462	86158668	SPONTANEOUS VAGINAL DELIVERY	DELIVERY	OBGY33A	81	50.96	2	52.96	Legal
573	2013-01-05	2013-01-06	36	F	412325	88875191	SPONTANEOUS VAGINAL DELIVERY	DELIVERY	OBGY33A	81	50.96	0	50.96	Legal
574	2013-01-05	2013-01-06	28	F	171963	16403252	SPONTANEOUS VAGINAL DELIVERY	DELIVERY	OBGY33A	81	50.96	6	56.96	Legal
575	2013-01-06	2013-01-06	28	F	423047	85210990	SPONTANEOUS VAGINAL DELIVERY	DELIVERY	OBGY33A	81	50.96	0	50.96	Legal
576	2013-01-05	2013-01-06	26	F	390909	58148774	SPONTANEOUS VAGINAL DELIVERY	DELIVERY	OBGY33A	81	50.96	4	54.96	Legal
577	2013-01-06	2013-01-06	30	F	401965	85344959	SPONTANEOUS VAGINAL DELIVERY	DELIVERY	OBGY33A	81	50.96	9	59.96	Legal
578	2013-01-05	2013-01-06	33	F	395454	64217598	SPONTANEOUS VAGINAL DELIVERY	DELIVERY	OBGY33A	81	50.96	6	56.96	Legal
579	2013-12-29	2013-01-06	39	F	393110	65709218	SPONTANEOUS VAGINAL DELIVERY	DELIVERY	OBGY33A	81	50.96	10	60.96	Legal
580	2013-01-06	2013-01-06	24	F	398910	73669261	SPONTANEOUS VAGINAL DELIVERY	DELIVERY	OBGY33A	81	50.96	4	54.96	Legal
581	2013-01-06	2013-01-07	26	F	423091	83442645	SPONTANEOUS VAGINAL DELIVERY	DELIVERY	OBGY33A	81	50.96	10	60.96	Legal
582	2013-01-06	2013-01-07	34	F	423032	47797069	SPONTANEOUS VAGINAL DELIVERY	DELIVERY	OBGY33A	81	50.96	3.04	54	Legal
583	2013-01-06	2013-01-07	24	F	406458	85047722	SPONTANEOUS VAGINAL DELIVERY	DELIVERY	OBGY33A	81	50.96	6	56.96	Legal
584	2013-01-06	2013-01-07	26	F	422974	76629705	SPONTANEOUS VAGINAL DELIVERY	DELIVERY	OBGY33A	81	50.96	10.51	61.47	Legal
585	2013-01-06	2013-01-07	28	F	423079	84220747	SPONTANEOUS VAGINAL DELIVERY	DELIVERY	OBGY33A	81	50.96	2	52.96	Legal
586	2013-01-06	2013-01-07	30	F	294150	77627929	SPONTANEOUS VAGINAL DELIVERY	DELIVERY	OBGY33A	81	50.96	2	52.96	Legal
587	2013-01-06	2013-01-07	33	F	423036	87219501	SPONTANEOUS VAGINAL DELIVERY	DELIVERY	OBGY33A	81	50.96	5.04	56	Legal
588	2013-01-05	2013-01-07	34	F	423022	83222939	SPONTANEOUS VAGINAL DELIVERY	DELIVERY	OBGY33A	81	50.96	5.04	56	Legal
589	2013-01-07	2013-01-07	26	F	389791	85767644	SPONTANEOUS VAGINAL DELIVERY	DELIVERY	OBGY33A	81	50.96	0	50.96	Legal
590	2013-01-06	2013-01-07	24	F	422990	84988630	SPONTANEOUS VAGINAL DELIVERY	DELIVERY	OBGY33A	81	50.96	8	58.96	Legal
591	2013-01-07	2013-01-09	15	F	359851	52464352	SPONTANEOUS VAGINAL DELIVERY	DELIVERY	OBGY33A	81	50.96	5	55.96	Legal
592	2013-01-09	2013-01-09	34	F	405563	82710345	SPONTANEOUS VAGINAL DELIVERY	DELIVERY	OBGY33A	81	50.96	7	57.96	Legal
593	2013-01-08	2013-01-09	32	F	401951	81885596	SPONTANEOUS VAGINAL DELIVERY	DELIVERY	OBGY33A	81	50.96	1	51.96	Legal
594	2013-01-09	2013-01-09	33	F	423414	36795705	SPONTANEOUS VAGINAL DELIVERY	DELIVERY	OBGY33A	81	50.96	5.2	56.16	Legal
595	2013-01-08	2013-01-09	19	F	423246	87804221	SPONTANEOUS VAGINAL DELIVERY	DELIVERY	OBGY33A	81	50.96	2.26	53.22	Legal
596	2013-01-04	2013-01-09	18	F	423023	83438356	SPONTANEOUS VAGINAL DELIVERY	DELIVERY	OBGY33A	81	50.96	13	63.96	Legal
597	2013-01-07	2013-01-08	86	F	389816	82663388	SPONTANEOUS VAGINAL DELIVERY	DELIVERY	OBGY33A	81	50.96	1	51.96	Legal
598	2013-01-06	2013-01-08	29	F	423058	57112235	SPONTANEOUS VAGINAL DELIVERY	DELIVERY	OBGY33A	81	50.96	5	55.96	Legal
599	2013-01-07	2013-01-08	15	F	394139	16537179	SPONTANEOUS VAGINAL DELIVERY	DELIVERY	OBGY33A	81	50.96	2	52.96	Legal
600	2013-01-06	2013-01-07	30	F	391330	66615820	SPONTANEOUS VAGINAL DELIVERY	DELIVERY	OBGY33A	81	50.96	5.04	56	Legal
601	2013-01-07	2013-01-08	26	F	389853	82734257	SPONTANEOUS VAGINAL DELIVERY	DELIVERY	OBGY33A	81	50.96	3	53.96	Legal
602	2013-01-08	2013-01-08	26	F	423100	61544883	SPONTANEOUS VAGINAL DELIVERY	DELIVERY	OBGY33A	81	50.96	5	55.96	Legal
603	2013-01-07	2013-01-08	33	F	419584	85878739	SPONTANEOUS VAGINAL DELIVERY	DELIVERY	OBGY33A	81	50.96	1	51.96	Legal
604	2013-01-08	2013-01-08	29	F	416790	86031910	SPONTANEOUS VAGINAL DELIVERY	DELIVERY	OBGY33A	81	50.96	3	53.96	Legal
605	2013-01-10	2013-01-10	30	F	403711	85106918	SPONTANEOUS VAGINAL DELIVERY	DELIVERY	OBGY33A	81	50.96	3	53.96	Legal
606	2013-01-04	2013-01-09	24	F	414527	77441782	SPONTANEOUS VAGINAL DELIVERY	DELIVERY	OBGY33A	81	50.96	9	59.96	Legal
607	2013-01-09	2013-01-10	18	F	395422	83690623	SPONTANEOUS VAGINAL DELIVERY	DELIVERY	OBGY33A	81	50.96	13	63.96	Legal
608	2013-01-08	2013-01-10	31	F	423384	86021528	SPONTANEOUS VAGINAL DELIVERY	DELIVERY	OBGY33A	81	50.96	14.43	65.39	Legal
609	2013-01-10	2013-01-11	28	F	404808	29307770	SPONTANEOUS VAGINAL DELIVERY	DELIVERY	OBGY33A	81	50.96	1	51.96	Legal
610	2013-01-09	2013-01-10	22	F	413382	77835433	SPONTANEOUS VAGINAL DELIVERY	DELIVERY	OBGY33A	81	50.96	13	63.96	Legal
611	2013-01-09	2013-01-10	35	F	406972	16584957	SPONTANEOUS VAGINAL DELIVERY	DELIVERY	OBGY33A	81	50.96	5	55.96	Legal
612	2013-01-10	2013-01-10	35	F	412294	85135930	SPONTANEOUS VAGINAL DELIVERY	DELIVERY	OBGY33A	81	50.96	0	50.96	Legal
613	2013-01-04	2013-01-07	33	F	422810	82971515	SPONTANEOUS VAGINAL DELIVERY	SEVERE PRE- EDAMPSIA DELIVERY	OBGY33A	81	50.96	34.18	85.14	Legal
614	2013-01-10	2013-01-11	32	F	423542	16516759	SPONTANEOUS VAGINAL DELIVERY	DELIVERY	OBGY33A	81	50.96	21.56	72.52	Legal
615	2013-01-08	2013-01-11	30	F	423361	78737847	SPONTANEOUS VAGINAL DELIVERY	PROLONG PREGNANY DELIVERY	OBGY33A	81	50.96	1	51.96	Legal
616	2013-01-09	2013-01-11	35	F	403478	85309045	SPONTANEOUS VAGINAL DELIVERY	DELIVERY	OBGY33A	81	50.96	5	55.96	Legal
617	2013-01-13	2013-01-14	33	F	401370	89337720	SPONTANEOUS VAGINAL DELIVERY	DELIVERY	OBGY33A	81	50.96	8.2	59.16	Legal
618	2013-01-13	2013-01-14	20	F	424034	84361943	SPONTANEOUS VAGINAL DELIVERY	DELIVERY	OBGY33A	81	50.96	1.55	52.51	Legal
619	2013-01-12	2013-01-14	32	F	423961	16442260	SPONTANEOUS VAGINAL DELIVERY	DELIVERY	OBGY33A	81	50.96	33.56	84.52	Legal
620	2013-01-07	2013-01-08	13	F	381965	67566308	SPONTANEOUS VAGINAL DELIVERY	DELIVERY	OBGY33A	81	50.96	6	56.96	Legal
621	2013-01-08	2013-01-08	31	F	316606	65572542	SPONTANEOUS VAGINAL DELIVERY	DELIVERY	OBGY33A	81	50.96	1	51.96	Legal
622	2013-01-10	2013-01-11	34	F	412331	84242390	SPONTANEOUS VAGINAL DELIVERY	DELIVERY	OBGY33A	81	50.96	5	55.96	Legal
623	2013-01-10	2013-01-11	23	F	423611	82631309	SPONTANEOUS VAGINAL DELIVERY	DELIVERY	OBGY33A	81	50.96	5	55.96	Legal
624	2013-01-10	2013-01-11	17	F	400534	78378877	SPONTANEOUS VAGINAL DELIVERY	DELIVERY	OBGY33A	81	50.96	1	51.96	Legal
625	2013-01-10	2013-01-11	35	F	295681	81881383	SPONTANEOUS VAGINAL DELIVERY	DELIVERY	OBGY33A	81	50.96	5	55.96	Legal
626	2013-01-09	2013-01-11	26	F	396136	83680021	SPONTANEOUS VAGINAL DELIVERY	DELIVERY	OBGY33A	81	50.96	11	61.96	Legal
627	2013-01-13	2013-01-13	21	F	424040	82594494	SPONTANEOUS VAGINAL DELIVERY	DELIVERY	OBGY33A	81	50.96	5	55.96	Legal
628	2013-01-11	2013-01-12	24	F	423551	74836044	SPONTANEOUS VAGINAL DELIVERY	DELIVERY	OBGY33A	81	50.96	5.1	56.06	Legal
629	2013-01-11	2013-01-13	32	F	423781	78243292	SPONTANEOUS VAGINAL DELIVERY	DELIVERY	OBGY33A	81	50.96	37.26	88.22	Legal
630	2013-01-13	2013-01-13	20	F	424007	88814949	SPONTANEOUS VAGINAL DELIVERY	DELIVERY	OBGY33A	81	50.96	5	55.96	Legal
631	2013-01-13	2013-01-13	22	F	401890	85151845	SPONTANEOUS VAGINAL DELIVERY	DELIVERY	OBGY33A	81	50.96	4	54.96	Legal
632	2013-01-12	2013-01-13	21	F	423986	83657767	SPONTANEOUS VAGINAL DELIVERY	DELIVERY	OBGY33A	81	50.96	4	54.96	Legal
633	2013-01-12	2013-01-13	31	F	314304	69362941	SPONTANEOUS VAGINAL DELIVERY	DELIVERY	OBGY33A	81	50.96	8	58.96	Legal
634	2013-01-12	2013-01-14	22	F	422909	85009351	SPONTANEOUS VAGINAL DELIVERY	DELIVERY	OBGY33A	81	50.96	59.92	110.88	Fraudulent
635	2013-01-11	2013-01-14	21	F	422897	89464415	SPONTANEOUS VAGINAL DELIVERY	DELIVERY	OBGY33A	81	50.96	55.72	106.68	Fraudulent
636	2013-01-14	2013-01-14	25	F	408250	20006632	SPONTANEOUS VAGINAL DELIVERY	DELIVERY	OBGY33A	81	50.96	1	51.96	Legal
637	2013-01-12	2013-01-12	20	F	420880	86387170	SPONTANEOUS VAGINAL DELIVERY	DELIVERY	OBGY33A	81	50.96	9.2	60.16	Legal
638	2013-01-11	2013-01-12	30	F	423787	52203658	SPONTANEOUS VAGINAL DELIVERY	DELIVERY	OBGY33A	81	50.96	2.8	53.76	Legal
639	2013-01-09	2013-01-12	25	F	423404	82349053	SPONTANEOUS VAGINAL DELIVERY	DELIVERY	OBGY33A	81	62.66	4.8	67.46	Legal
640	2013-01-11	2013-01-12	27	F	423677	69186983	SPONTANEOUS VAGINAL DELIVERY	DELIVERY	OBGY33A	81	50.96	1.2	52.16	Legal
641	2013-01-11	2013-01-12	35	F	293275	85890604	SPONTANEOUS VAGINAL DELIVERY	DELIVERY	OBGY33A	81	50.96	9.2	60.16	Legal
642	2013-01-11	2013-01-12	36	F	408308	66910008	SPONTANEOUS VAGINAL DELIVERY	DELIVERY	OBGY33A	81	50.96	2.6	53.56	Legal
643	2013-01-11	2013-01-12	33	F	400982	16490904	SPONTANEOUS VAGINAL DELIVERY	DELIVERY	OBGY33A	81	50.96	2.04	53	Legal
644	2013-01-11	2013-01-12	41	F	423684	36961744	SPONTANEOUS VAGINAL DELIVERY	DELIVERY	OBGY33A	81	50.96	5.3	56.26	Legal
645	2013-01-11	2013-01-12	25	F	368210	86643097	SPONTANEOUS VAGINAL DELIVERY	DELIVERY	OBGY33A	81	50.96	1	51.96	Legal
646	2012-12-31	2013-01-05	21	F	401934	74910291	CAESAREAN SECTION	PREGNANCY WITH PLATED PELVIC FRACTURE	OBGY33A	0	231.14	97.6	328.74	Fraudulent
647	2013-01-12	2013-01-13	26	F	386194	77953753	SPONTANEOUS VAGINAL DELIVERY	DELIVERY	OBGY33A	81	50.96	9.3	60.26	Legal
648	2013-01-20	2013-01-21	31	F	411513	85447415	SPONTANEOUS VAGINAL DELIVERY	DELIVERY	OBGY33A	81	50.96	8	58.96	Legal
649	2013-01-21	2013-01-23	28	F	420753	52849425	SPONTANEOUS VAGINAL DELIVERY	DELIVERY	OBGY33A	81	50.96	3	53.96	Legal
650	2013-01-19	2013-01-20	33	F	406370	85287597	SPONTANEOUS VAGINAL DELIVERY	DELIVERY	OBGY33A	81	50.96	11	61.96	Legal
651	2013-01-21	2013-01-22	27	F	400421	82263693	SPONTANEOUS VAGINAL DELIVERY	DELIVERY	OBGY33A	81	50.96	13.8	64.76	Legal
652	2013-01-21	2013-01-22	32	F	293071	83160907	SPONTANEOUS VAGINAL DELIVERY	DELIVERY	OBGY33A	81	50.96	40.54	91.5	Fraudulent
653	2013-01-19	2013-01-22	20	F	407554	84217279	SPONTANEOUS VAGINAL DELIVERY	DELIVERY	OBGY33A	81	50.96	32.64	83.6	Legal
654	2013-01-21	2013-01-22	29	F	425407	83387755	SPONTANEOUS VAGINAL DELIVERY	DELIVERY	OBGY33A	81	50.96	27.4	78.36	Legal
655	2013-01-17	2013-01-22	25	F	395416	88498155	SPONTANEOUS VAGINAL DELIVERY	DELIVERY	OBGY33A	81	50.96	56.62	107.58	Fraudulent
656	2013-01-19	2013-01-21	36	F	425120	63207347	SPONTANEOUS VAGINAL DELIVERY	DELIVERY	OBGY33A	81	50.96	25.26	76.22	Legal
657	2013-01-21	2013-01-21	25	F	420533	87798001	SPONTANEOUS VAGINAL DELIVERY	DELIVERY	OBGY33A	81	50.96	2	52.96	Legal
658	2013-01-21	2013-01-21	22	F	425170	65131847	SPONTANEOUS VAGINAL DELIVERY	DELIVERY	OBGY33A	81	50.96	18.14	69.1	Legal
659	2013-01-21	2013-01-21	32	F	394101	83337180	SPONTANEOUS VAGINAL DELIVERY	DELIVERY	OBGY33A	81	50.96	0	50.96	Legal
660	2013-01-20	2013-01-21	26	F	425200	67920555	SPONTANEOUS VAGINAL DELIVERY	DELIVERY	OBGY33A	81	50.96	2	52.96	Legal
661	2013-01-20	2013-01-21	31	F	404839	53775412	SPONTANEOUS VAGINAL DELIVERY	DELIVERY	OBGY33A	81	50.96	6	56.96	Legal
662	2013-01-20	2013-01-21	33	F	425127	66633127	SPONTANEOUS VAGINAL DELIVERY	DELIVERY	OBGY33A	81	50.96	4	54.96	Legal
663	2013-01-21	2013-01-21	25	F	366211	16527575	SPONTANEOUS VAGINAL DELIVERY	DELIVERY	OBGY33A	81	50.96	6	56.96	Legal
664	2013-01-20	2013-01-21	35	F	421873	88508880	SPONTANEOUS VAGINAL DELIVERY	DELIVERY	OBGY33A	81	50.96	8	58.96	Legal
665	2013-01-20	2013-01-21	32	F	397205	82794503	SPONTANEOUS VAGINAL DELIVERY	DELIVERY	OBGY33A	81	50.96	10	60.96	Legal
666	2013-01-19	2013-01-21	26	F	425168	84956513	SPONTANEOUS VAGINAL DELIVERY	DELIVERY	OBGY33A	81	50.96	4	54.96	Legal
667	2013-01-21	2013-01-21	33	F	425428	16499550	SPONTANEOUS VAGINAL DELIVERY	DELIVERY	OBGY33A	81	50.96	6	56.96	Legal
668	2013-01-20	2013-01-22	23	F	390812	77289309	SPONTANEOUS VAGINAL DELIVERY	DELIVERY	OBGY33A	81	50.96	8	58.96	Legal
669	2013-01-21	2013-01-22	33	F	404473	84972238	SPONTANEOUS VAGINAL DELIVERY	DELIVERY	OBGY33A	81	50.96	10.6	61.56	Legal
670	2013-01-22	2013-01-22	25	F	400919	84954258	SPONTANEOUS VAGINAL DELIVERY	DELIVERY	OBGY33A	81	50.96	7	57.96	Legal
671	2013-01-21	2013-01-21	27	F	395440	83685325	SPONTANEOUS VAGINAL DELIVERY	DELIVERY	OBGY33A	81	50.96	8	58.96	Legal
672	2013-01-14	2013-01-15	27	F	396184	77969179	SPONTANEOUS VAGINAL DELIVERY	DELIVERY	OBGY33A	81	50.96	6	56.96	Legal
673	2013-01-14	2013-01-15	17	F	424218	85736777	SPONTANEOUS VAGINAL DELIVERY	DELIVERY	OBGY33A	81	50.96	6	56.96	Legal
674	2013-01-13	2013-01-15	30	F	150199	16527805	SPONTANEOUS VAGINAL DELIVERY	DELIVERY	OBGY33A	81	50.96	6	56.96	Legal
675	2013-01-15	2013-01-15	40	F	306675	16368303	SPONTANEOUS VAGINAL DELIVERY	DELIVERY	OBGY33A	81	50.96	8	58.96	Legal
676	2013-01-14	2013-01-15	33	F	403492	79097413	SPONTANEOUS VAGINAL DELIVERY	DELIVERY	OBGY33A	81	50.96	2	52.96	Legal
677	2013-01-14	2013-01-15	28	F	120467	44660538	SPONTANEOUS VAGINAL DELIVERY	DELIVERY	OBGY33A	81	50.96	9.04	60	Legal
678	2013-01-14	2013-01-15	22	F	418685	88009623	SPONTANEOUS VAGINAL DELIVERY	DELIVERY	OBGY33A	81	50.96	2	52.96	Legal
679	2013-01-14	2013-01-15	25	F	419441	62149275	SPONTANEOUS VAGINAL DELIVERY	DELIVERY	OBGY33A	81	50.96	2	52.96	Legal
680	2013-01-16	2013-01-17	21	F	421847	82825938	SPONTANEOUS VAGINAL DELIVERY	DELIVERY	OBGY33A	81	50.96	3	53.96	Legal
681	2013-01-16	2013-01-16	36	F	418962	84217268	SPONTANEOUS VAGINAL DELIVERY	DELIVERY	OBGY33A	81	50.96	6	56.96	Legal
682	2013-01-16	2013-01-16	46	F	303334	46126408	SPONTANEOUS VAGINAL DELIVERY	DELIVERY	OBGY33A	81	50.96	8	58.96	Legal
683	2013-01-15	2013-01-16	23	F	423101	78076172	SPONTANEOUS VAGINAL DELIVERY	DELIVERY	OBGY33A	81	50.96	8	58.96	Legal
684	2013-01-16	2013-01-16	25	F	391849	82702877	SPONTANEOUS VAGINAL DELIVERY	DELIVERY	OBGY33A	81	50.96	6	56.96	Legal
685	2013-01-16	2013-01-16	32	F	423687	83691249	SPONTANEOUS VAGINAL DELIVERY	DELIVERY	OBGY33A	81	50.96	4	54.96	Legal
686	2013-01-15	2013-01-16	29	F	424433	16516600	SPONTANEOUS VAGINAL DELIVERY	DELIVERY	OBGY33A	81	50.96	8.2	59.16	Legal
687	2013-01-16	2013-01-16	18	F	423399	86212719	SPONTANEOUS VAGINAL DELIVERY	DELIVERY	OBGY33A	81	50.96	6	56.96	Legal
688	2013-01-15	2013-01-16	37	F	404437	69200343	SPONTANEOUS VAGINAL DELIVERY	DELIVERY	OBGY33A	81	50.96	4	54.96	Legal
689	2013-01-15	2013-01-16	25	F	408273	67373257	SPONTANEOUS VAGINAL DELIVERY	DELIVERY	OBGY33A	81	50.96	4	54.96	Legal
690	2013-01-15	2013-01-16	24	F	424440	82391008	SPONTANEOUS VAGINAL DELIVERY	DELIVERY	OBGY33A	81	50.96	0	50.96	Legal
691	2013-01-16	2013-01-16	29	F	390527	69662849	SPONTANEOUS VAGINAL DELIVERY	DELIVERY	OBGY33A	81	50.96	6	56.96	Legal
692	2013-01-16	2013-01-16	23	F	424445	82663926	SPONTANEOUS VAGINAL DELIVERY	DELIVERY	OBGY33A	81	50.96	0	50.96	Legal
693	2013-01-15	2013-01-16	21	F	417556	84838759	SPONTANEOUS VAGINAL DELIVERY	DELIVERY	OBGY33A	81	50.96	10.96	61.92	Legal
694	2013-01-16	2013-01-16	30	F	388332	16403084	SPONTANEOUS VAGINAL DELIVERY	DELIVERY	OBGY33A	81	50.96	6	56.96	Legal
695	2013-01-11	2013-01-12	27	F	414597	82877675	SPONTANEOUS VAGINAL DELIVERY	DELIVERY	OBGY33A	81	50.96	11.9	62.86	Legal
696	2013-01-17	2013-01-17	30	F	424523	83580625	SPONTANEOUS VAGINAL DELIVERY	DELIVERY	OBGY33A	81	50.96	4.2	55.16	Legal
697	2013-01-17	2013-01-17	56	F	394106	65571680	SPONTANEOUS VAGINAL DELIVERY	DELIVERY	OBGY33A	81	50.96	4	54.96	Legal
698	2013-01-17	2013-01-17	33	F	403574	85645313	SPONTANEOUS VAGINAL DELIVERY	DELIVERY	OBGY33A	81	50.96	4	54.96	Legal
699	2013-01-16	2013-01-17	40	F	424681	85189381	SPONTANEOUS VAGINAL DELIVERY	DELIVERY	OBGY33A	81	50.96	9	59.96	Legal
700	2013-01-16	2013-01-17	20	F	414176	87149399	SPONTANEOUS VAGINAL DELIVERY	DELIVERY	OBGY33A	81	50.96	9.8	60.76	Legal
701	2013-01-16	2013-01-17	30	F	424662	82248089	SPONTANEOUS VAGINAL DELIVERY	DELIVERY	OBGY33A	81	50.96	10	60.96	Legal
702	2013-01-16	2013-01-17	33	F	424668	81814599	SPONTANEOUS VAGINAL DELIVERY	DELIVERY	OBGY33A	81	50.96	4.2	55.16	Legal
703	2013-01-17	2013-01-17	22	F	346110	60867567	SPONTANEOUS VAGINAL DELIVERY	DELIVERY	OBGY33A	81	50.96	4	54.96	Legal
704	2013-01-12	2013-01-14	32	F	423570	84916406	SPONTANEOUS VAGINAL DELIVERY	DELIVERY	OBGY33A	81	50.96	72.16	123.12	Fraudulent
705	2013-01-10	2013-01-12	32	F	420355	83438139	SPONTANEOUS VAGINAL DELIVERY	DELIVERY	OBGY33A	81	50.96	39.04	90	Fraudulent
706	2013-01-09	2013-01-09	28	F	423409	60767888	SPONTANEOUS VAGINAL DELIVERY	DELIVERY	OBGY33A	81	50.96	1	51.96	Legal
707	2013-01-04	2013-01-09	26	F	408702	81697049	SPONTANEOUS VAGINAL DELIVERY	DELIVERY	OBGY33A	81	50.96	13	63.96	Legal
708	2013-01-18	2013-01-20	13	F	424937	82315225	SPONTANEOUS VAGINAL DELIVERY	DELIVERY	OBGY33A	81	50.96	12.4	63.36	Legal
709	2013-01-19	2013-01-20	28	F	424751	81622523	SPONTANEOUS VAGINAL DELIVERY	DELIVERY	OBGY33A	81	50.96	16	66.96	Legal
710	2013-01-19	2013-01-20	25	F	404854	85154434	SPONTANEOUS VAGINAL DELIVERY	DELIVERY	OBGY33A	81	50.96	0.51	51.47	Legal
711	2013-01-19	2013-01-20	25	F	355075	75346081	SPONTANEOUS VAGINAL DELIVERY	DELIVERY	OBGY33A	81	50.96	2	52.96	Legal
712	2013-01-20	2013-01-20	23	F	425172	85134854	SPONTANEOUS VAGINAL DELIVERY	DELIVERY	OBGY33A	81	50.96	4	54.96	Legal
713	2013-01-19	2013-01-20	39	F	425065	85784021	SPONTANEOUS VAGINAL DELIVERY	DELIVERY	OBGY33A	81	50.96	6	56.96	Legal
714	2013-01-19	2013-01-20	24	F	421848	38171884	SPONTANEOUS VAGINAL DELIVERY	DELIVERY	OBGY33A	81	50.96	16	66.96	Legal
715	2013-01-18	2013-01-20	29	F	388387	82220061	SPONTANEOUS VAGINAL DELIVERY	DELIVERY	OBGY33A	81	50.96	4	54.96	Legal
716	2013-01-20	2013-01-20	31	F	390867	16359396	SPONTANEOUS VAGINAL DELIVERY	DELIVERY	OBGY33A	81	50.96	2	52.96	Legal
717	2013-01-17	2013-01-20	29	F	424745	84068330	SPONTANEOUS VAGINAL DELIVERY	DELIVERY	OBGY33A	81	50.96	15.2	66.16	Legal
718	2013-01-20	2013-01-20	32	F	419520	65913021	SPONTANEOUS VAGINAL DELIVERY	DELIVERY	OBGY33A	81	50.96	0	50.96	Legal
719	2013-01-19	2013-01-20	29	F	259954	62162768	SPONTANEOUS VAGINAL DELIVERY	DELIVERY	OBGY33A	81	50.96	10.35	61.31	Legal
720	2013-01-16	2013-01-18	27	F	394088	81783703	SPONTANEOUS VAGINAL DELIVERY	DELIVERY	OBGY33A	81	50.96	9.72	60.68	Legal
721	2013-01-15	2013-01-19	31	F	393091	67173771	SPONTANEOUS VAGINAL DELIVERY	DELIVERY	OBGY33A	81	50.96	59.36	110.32	Fraudulent
722	2013-01-17	2013-01-19	21	F	424083	87866127	SPONTANEOUS VAGINAL DELIVERY	DELIVERY	OBGY33A	81	50.96	50.73	101.69	Fraudulent
723	2013-01-23	2013-01-24	17	F	415446	85368611	SPONTANEOUS VAGINAL DELIVERY WITH EPISIOTOMY	DELIVERY	OBGY33A	81	50.96	4	54.96	Legal
724	2013-01-22	2013-01-23	31	F	400514	16378991	SPONTANEOUS VAGINAL DELIVERY	DELIVERY	OBGY33A	81	50.96	4	54.96	Legal
725	2013-01-22	2013-01-23	34	F	425438	16391543	SPONTANEOUS VAGINAL DELIVERY	DELIVERY	OBGY33A	81	50.96	15.8	66.76	Legal
726	2013-01-22	2013-01-23	34	F	425414	67253337	SPONTANEOUS VAGINAL DELIVERY	DELIVERY	OBGY33A	81	50.96	4	54.96	Legal
727	2013-01-22	2013-01-23	19	F	425032	85187823	SPONTANEOUS VAGINAL DELIVERY	DELIVERY	OBGY33A	81	50.96	2	52.96	Legal
728	2013-01-21	2013-01-23	27	F	425409	84197770	SPONTANEOUS VAGINAL DELIVERY	DELIVERY	OBGY33A	81	50.96	25.4	76.36	Legal
729	2013-01-22	2013-01-23	22	F	425680	84234935	SPONTANEOUS VAGINAL DELIVERY	DELIVERY	OBGY33A	81	50.96	4	54.96	Legal
730	2013-01-23	2013-01-23	41	F	425689	59451507	SPONTANEOUS VAGINAL DELIVERY	DELIVERY	OBGY33A	81	50.96	0	50.96	Legal
731	2013-01-17	2013-01-23	32	F	424741	84988434	SPONTANEOUS VAGINAL DELIVERY	DELIVERY	OBGY33A	81	50.96	31.36	82.32	Legal
732	2013-01-22	2013-01-23	34	F	395180	83157674	SPONTANEOUS VAGINAL DELIVERY	DELIVERY	OBGY33A	81	50.96	4.2	55.16	Legal
733	2013-01-22	2013-01-23	25	F	404790	84222277	SPONTANEOUS VAGINAL DELIVERY	DELIVERY	OBGY33A	81	50.96	7.6	58.56	Legal
734	2013-01-23	2013-01-23	35	F	389827	16406704	SPONTANEOUS VAGINAL DELIVERY	DELIVERY	OBGY33A	81	50.96	2	52.96	Legal
735	2013-01-17	2013-01-23	26	F	424655	35946146	SPONTANEOUS VAGINAL DELIVERY	PRE-TERM PROM-DELIVERY	OBGY33A	81	50.96	7.24	58.2	Legal
736	2013-01-22	2013-01-23	28	F	325457	87229593	SPONTANEOUS VAGINAL DELIVERY	DELIVERY	OBGY33A	81	50.96	49.74	100.7	Fraudulent
737	2013-01-21	2013-01-22	34	F	275905	16535298	SPONTANEOUS VAGINAL DELIVERY	DELIVERY	OBGY33A	81	50.96	9	59.96	Legal
738	2013-01-21	2013-01-22	32	F	397145	61272509	SPONTANEOUS VAGINAL DELIVERY	DELIVERY	OBGY33A	81	50.96	14.6	65.56	Legal
739	2013-01-21	2013-01-22	39	F	391860	82074337	SPONTANEOUS VAGINAL DELIVERY	DELIVERY	OBGY33A	81	50.96	11	61.96	Legal
740	2013-01-30	2013-01-31	35	F	390878	15731552	SPONTANEOUS VAGINAL DELIVERY	DELIVERY	OBGY33A	0	50.97	4	54.97	Legal
741	2013-01-22	2013-01-29	18	F	408715	86549226	SPONTANEOUS VAGINAL DELIVERY	DELIVERY	OBGY33A	81	50.96	28.22	79.18	Legal
742	2013-01-29	2013-01-30	35	F	285420	56298717	SPONTANEOUS VAGINAL DELIVERY	DELIVERY	OBGY33A	81	50.96	4	54.96	Legal
743	2013-01-23	2013-01-30	29	F	425805	31373870	SPONTANEOUS VAGINAL DELIVERY	SEVERE ANAEMIA DELIVERY	OBGY33A	0	50.96	12.2	63.16	Legal
744	2013-01-30	2013-01-30	34	F	403174	86346872	SPONTANEOUS VAGINAL DELIVERY	DELIVERY	OBGY33A	81	50.96	0	50.96	Legal
745	2013-01-30	2013-01-30	31	F	244498	83682499	SPONTANEOUS VAGINAL DELIVERY	DELIVERY	OBGY33A	81	50.96	0	50.96	Legal
746	2013-01-29	2013-01-30	28	F	426408	71852358	SPONTANEOUS VAGINAL DELIVERY	DELIVERY	OBGY33A	81	50.96	4	54.96	Legal
747	2013-01-29	2013-01-30	26	F	390594	65617040	SPONTANEOUS VAGINAL DELIVERY	DELIVERY	OBGY33A	81	50.96	4	54.96	Legal
748	2013-01-29	2013-01-30	31	F	262236	73591307	SPONTANEOUS VAGINAL DELIVERY	DELIVERY	OBGY33A	81	50.96	4	54.96	Legal
749	2013-01-28	2013-01-30	28	F	425605	86683239	SPONTANEOUS VAGINAL DELIVERY	DELIVERY	OBGY33A	81	50.96	10	60.96	Legal
750	2013-01-29	2013-01-30	26	F	407023	85944720	SPONTANEOUS VAGINAL DELIVERY	DELIVERY	OBGY33A	81	50.96	8	58.96	Legal
751	2013-01-28	2013-01-29	30	F	390792	82667269	SPONTANEOUS VAGINAL DELIVERY	DELIVERY	OBGY33A	81	50.96	19	69.96	Legal
752	2013-01-24	2013-01-29	17	F	423368	49709399	SPONTANEOUS VAGINAL DELIVERY	DELIVERY	OBGY33A	0	50.96	47.48	98.44	Fraudulent
753	2013-01-08	2013-01-10	27	F	398855	84477530	SPONTANEOUS VAGINAL DELIVERY	DELIVERY	OBGY33A	81	50.96	3	53.96	Legal
754	2013-01-30	2013-01-31	30	F	398873	85424789	SPONTANEOUS VAGINAL DELIVERY	DELIVERY	OBGY33A	81	50.96	10	60.96	Legal
755	2013-01-30	2013-01-31	23	F	406443	86345565	SPONTANEOUS VAGINAL DELIVERY	DELIVERY	OBGY33A	81	50.96	17.6	68.56	Legal
756	2013-01-31	2013-01-31	28	F	320691	59671135	SPONTANEOUS VAGINAL DELIVERY	DELIVERY	OBGY33A	81	50.96	2	52.96	Legal
757	2013-01-31	2013-01-31	23	F	426621	85863753	SPONTANEOUS VAGINAL DELIVERY	DELIVERY	OBGY33A	81	50.96	9	59.96	Legal
758	2013-01-29	2013-01-31	11	F	426603	66955906	E.O.U	VAGINAL TEAR	OBGY33A	81	72.8	9.68	82.48	Legal
759	2013-01-30	2013-01-31	31	F	401520	23163420	SPONTANEOUS VAGINAL DELIVERY	DELIVERY	OBGY33A	81	50.96	5	55.96	Legal
760	2013-01-03	2013-01-31	30	F	397127	51361481	SPONTANEOUS VAGINAL DELIVERY	DELIVERY	OBGY33A	81	50.96	9.8	60.76	Legal
761	2013-01-29	2013-01-31	32	F	408277	65849042	SPONTANEOUS VAGINAL DELIVERY	DELIVERY	OBGY33A	81	50.96	5	55.96	Legal
762	2013-01-30	2013-01-31	28	F	426694	47006112	SPONTANEOUS VAGINAL DELIVERY	IUFD IN LATENT	OBGY33A	81	50.96	27.5	78.46	Legal
763	2013-01-24	2013-01-25	21	F	232106	49609704	SPONTANEOUS VAGINAL DELIVERY	DELIVERY	OBGY33A	81	50.96	4	54.96	Legal
764	2013-01-24	2013-01-25	24	F	424824	64580410	SPONTANEOUS VAGINAL DELIVERY	DELIVERY	OBGY33A	81	62.66	16.11	78.77	Legal
765	2013-01-25	2013-01-26	29	F	425939	45913329	SPONTANEOUS VAGINAL DELIVERY	DELIVERY	OBGY33A	81	50.96	4	54.96	Legal
766	2013-01-25	2013-01-26	30	F	404830	15700791	SPONTANEOUS VAGINAL DELIVERY	DELIVERY	OBGY33A	81	50.96	6	56.96	Legal
767	2013-01-25	2013-01-26	20	F	421846	89906694	SPONTANEOUS VAGINAL DELIVERY	DELIVERY	OBGY33A	81	50.96	1	51.96	Legal
768	2013-01-24	2013-01-26	27	F	410669	83819450	SPONTANEOUS VAGINAL DELIVERY	DELIVERY	OBGY33A	81	50.96	8	58.96	Legal
769	2013-01-25	2013-01-26	27	F	394084	61381670	SPONTANEOUS VAGINAL DELIVERY	DELIVERY	OBGY33A	81	62.66	17	79.66	Legal
770	2013-01-27	2013-01-28	22	F	405566	68034423	SPONTANEOUS VAGINAL DELIVERY	DELIVERY	OBGY33A	81	50.96	4	54.96	Legal
771	2013-01-27	2013-01-28	28	F	399415	79958435	SPONTANEOUS VAGINAL DELIVERY	DELIVERY	OBGY33A	81	50.96	9.04	60	Legal
772	2013-01-27	2013-01-28	32	F	403490	16491088	SPONTANEOUS VAGINAL DELIVERY	DELIVERY	OBGY33A	81	50.96	7.6	58.56	Legal
773	2013-01-27	2013-01-28	24	F	426149	16351012	SPONTANEOUS VAGINAL DELIVERY	DELIVERY	OBGY33A	81	50.96	4	54.96	Legal
774	2013-01-24	2013-01-27	33	F	425901	84453120	SPONTANEOUS VAGINAL DELIVERY	DELIVERY	OBGY33A	81	50.96	25.26	76.22	Legal
775	2013-01-27	2013-01-28	32	F	393122	82545150	SPONTANEOUS VAGINAL DELIVERY	DELIVERY	OBGY33A	81	50.96	21.1	72.06	Legal
776	2013-01-28	2013-01-29	21	F	405528	84668693	SPONTANEOUS VAGINAL DELIVERY	DELIVERY	OBGY33A	81	50.96	13	63.96	Legal
777	2013-01-28	2013-01-29	37	F	426266	69360099	SPONTANEOUS VAGINAL DELIVERY	DELIVERY	OBGY33A	81	50.96	1	51.96	Legal
778	2013-01-29	2013-01-29	18	F	426402	11037227	SPONTANEOUS VAGINAL DELIVERY	DELIVERY	OBGY33A	81	50.96	7	57.96	Legal
779	2013-01-29	2013-01-29	19	F	426226	86274077	SPONTANEOUS VAGINAL DELIVERY	DELIVERY	OBGY33A	81	50.96	3	53.96	Legal
780	2013-01-28	2013-01-29	28	F	426288	16440146	SPONTANEOUS VAGINAL DELIVERY	DELIVERY	OBGY33A	81	50.96	4	54.96	Legal
781	2013-01-28	2013-01-30	26	F	426324	89247164	SPONTANEOUS VAGINAL DELIVERY	DELIVERY	OBGY33A	81	50.96	10.2	61.16	Legal
782	2013-01-26	2013-01-27	20	F	398817	57069234	SPONTANEOUS VAGINAL DELIVERY	DELIVERY	OBGY33A	81	50.96	12	62.96	Legal
783	2013-01-27	2013-01-27	24	F	426133	69756943	SPONTANEOUS VAGINAL DELIVERY	DELIVERY	OBGY33A	81	50.96	2.2	53.16	Legal
784	2013-01-26	2013-01-27	37	F	408256	61199769	SPONTANEOUS VAGINAL DELIVERY	DELIVERY	OBGY33A	81	50.96	16	66.96	Legal
785	2013-01-27	2013-01-27	30	F	240985	76545139	SPONTANEOUS VAGINAL DELIVERY	DELIVERY	OBGY33A	81	50.96	9.8	60.76	Legal
786	2013-01-27	2013-01-27	37	F	406372	24793541	SPONTANEOUS VAGINAL DELIVERY	DELIVERY	OBGY33A	81	50.96	4	54.96	Legal
787	2013-01-27	2013-01-27	34	F	426151	76678172	SPONTANEOUS VAGINAL DELIVERY	DELIVERY	OBGY33A	81	50.96	5	55.96	Legal
788	2013-01-26	2013-01-27	28	F	415278	60888165	SPONTANEOUS VAGINAL DELIVERY	DELIVERY	OBGY33A	81	50.96	20	70.96	Legal
789	2013-01-25	2013-01-26	26	F	420424	64361268	SPONTANEOUS VAGINAL DELIVERY	DELIVERY	OBGY33A	81	50.96	5	55.96	Legal
790	2013-01-25	2013-01-26	40	F	162646	84710603	SPONTANEOUS VAGINAL DELIVERY	DELIVERY	OBGY33A	81	50.96	9	59.96	Legal
791	2013-01-25	2013-01-26	37	F	424825	82609501	SPONTANEOUS VAGINAL DELIVERY	DELIVERY	OBGY33A	81	50.96	12.8	63.76	Legal
792	2013-01-25	2013-01-26	25	F	183967	87798884	SPONTANEOUS VAGINAL DELIVERY	DELIVERY	OBGY33A	81	50.96	3	53.96	Legal
793	2013-01-23	2013-01-24	25	F	398891	83134440	SPONTANEOUS VAGINAL DELIVERY	DELIVERY	OBGY33A	81	50.96	4	54.96	Legal
794	2013-01-24	2013-01-24	36	F	401979	64519548	SPONTANEOUS VAGINAL DELIVERY	DELIVERY	OBGY33A	81	50.96	4	54.96	Legal
795	2013-01-24	2013-01-24	25	F	424800	71396259	SPONTANEOUS VAGINAL DELIVERY	DELIVERY	OBGY33A	81	50.96	20.4	71.36	Legal
796	2013-01-23	2013-01-24	26	F	425752	88736254	SPONTANEOUS VAGINAL DELIVERY	DELIVERY	OBGY33A	81	50.96	4	54.96	Legal
797	2013-01-24	2013-01-24	41	F	425803	16394148	SPONTANEOUS VAGINAL DELIVERY	DELIVERY	OBGY33A	81	50.96	4	54.96	Legal
798	2013-01-24	2013-01-24	41	F	425825	86268311	SPONTANEOUS VAGINAL DELIVERY	DELIVERY	OBGY33A	81	50.96	4	54.96	Legal
799	2013-01-24	2013-01-24	29	F	307666	84584302	SPONTANEOUS VAGINAL DELIVERY	DELIVERY	OBGY33A	81	50.96	2	52.96	Legal
800	2013-01-24	2013-01-24	30	F	408308	84323082	SPONTANEOUS VAGINAL DELIVERY	DELIVERY	OBGY33A	81	50.96	4	54.96	Legal
801	2013-01-25	2013-01-26	26	F	425253	85251013	SPONTANEOUS VAGINAL DELIVERY	DELIVERY	OBGY33A	0	50.96	71.92	122.88	Fraudulent
802	2013-01-23	2013-01-24	23	F	370103	66885851	SPONTANEOUS VAGINAL DELIVERY	DELIVERY	OBGY33A	0	50.96	4	54.96	Legal
803	2012-12-18	2012-12-21	35	F	413356	83661640	SPONTENEOUS VAGINAL DELIVERY	DELIVERY	OBGY33A	81	50.96	25.87	76.83	Legal
804	2012-11-14	2012-12-02	34	F	415440	65475047	CEASAREAN SECTION	POST DATE	OBGY33A	0	231.14	81.62	312.76	Fraudulent
805	2012-12-10	2012-12-14	39	F	345936	61774422	CEASAREAN SECTION	DELIVERY	OBGY33A	0	231.14	85.06	316.2	Fraudulent
806	2012-12-10	2012-12-14	36	F	406330	83347498	SPONTENEOUS VAGINAL EPISIOTOMY	DELIVERY	OBGY33A	0	50.96	30.2	81.16	Legal
807	2013-01-03	2013-01-04	30	F	422681	81767899	SPONTANEOUS VAGINAL DELIVERYWITH EPISIOTOMY	DELIVERY	OBGY34A	0	62.66	8	70.66	Legal
808	2013-01-04	2013-01-05	23	F	422828	82774446	SPONTANEOUS VAGINAL DELIVERY WITH EPISIOTOMY	DELIVERY	OBGY34A	0	62.66	8	70.66	Legal
809	2013-01-04	2013-01-05	27	F	413332	35878057	SPONTANEOUS VAGINAL DELIVERY WITH EPISIOTOMY	DELIVERY	OBGY34A	0	62.66	26.25	88.91	Fraudulent
810	2013-01-05	2013-01-06	26	F	422803	82706627	SPONTANEOUS VAGINAL DELIVERY WITH EPISIOTOMY	DELIVERY	OBGY34A	0	62.66	8	70.66	Legal
811	2013-01-04	2013-01-05	24	F	422834	82298234	SPONTANEOUS VAGINAL DELIVERY	DELIVERY	OBGY34A	0	50.96	2	52.96	Legal
812	2013-01-10	2013-01-11	23	F	423643	86972669	SPONTANEOUS VAGINAL DELIVERYWITH EPISIOTOMY	DELIVERY	OBGY34A	0	62.66	28.43	91.09	Fraudulent
813	2013-01-22	2013-01-22	26	F	413426	82695017	SPONTANEOUS VAGINAL DELIVERYWITH EPISIOTOMY	DELIVERY	OBGY34A	81	62.66	12	74.66	Legal
814	2013-01-18	2013-01-19	32	F	415006	73494197	SPONTANEOUS VAGINAL DELIVERY	NORMAL DELIVERY	OBGY34A	0	62.66	8	70.66	Legal
815	2013-01-17	2013-01-19	24	F	381985	81060348	SPONTANEOUS VAGINAL DELIVERY	NORMAL DELIVERY	OBGY34A	0	62.66	8	70.66	Legal
816	2013-01-18	2013-01-19	29	F	425038	84226015	SPONTANEOUS VAGINAL DELIVERY	DELIVERY	OBGY34A	0	62.66	4	66.66	Legal
817	2013-01-19	2013-01-20	21	F	424895	82736455	SPONTANEOUS VAGINAL DELIVERY	DELIVERY	OBGY34A	0	62.66	35	97.66	Fraudulent
818	2013-01-16	2013-01-19	27	F	424540	74715719	SPONTANEOUS VAGINAL DELIVERY	DELIVERY	OBGY34A	0	62.66	52.1	114.76	Fraudulent
819	2013-01-22	2013-01-23	15	F	406383	86053853	SPONTANEOUS VAGINAL DELIVERY	DELIVERY	OBGY34A	0	62.66	23.94	86.6	Legal
820	2013-01-22	2013-01-23	26	F	425433	85151672	SPONTANEOUS VAGINAL DELIVERY WITH EPISIOTOMY SUTUR	DELIVERY	OBGY34A	0	62.66	8	70.66	Legal
821	2013-01-20	2013-01-22	23	F	422883	80666276	SPONTANEOUS VAGINAL DELIVERY WITH EPISIOTOMY	DELIVERY	OBGY34A	0	62.66	15.04	77.7	Legal
822	2013-01-21	2013-01-22	28	F	418678	83616772	SPONTANEOUS VAGINAL DELIVERY WITH EPISIOTOMY	DELIVERY	OBGY34A	0	62.66	7	69.66	Legal
823	2013-01-21	2013-01-22	22	F	397199	82058846	SPONTANEOUS VAGINAL DELIVERY WITH EPISIOTOMY	DELIVERY	OBGY34A	0	62.66	5	67.66	Legal
824	2013-01-30	2013-01-31	31	F	426432	68242623	SPONTANEOUS VAGINAL DELIVERY WITH EPISIOTOMY	DELIVERY	OBGY34A	0	62.66	54.68	117.34	Fraudulent
825	2013-01-30	2013-01-31	37	F	119489	16502126	SPONTANEOUS VAGINAL DELIVERY WITH EPISIOTOMY	DELIVERY	OBGY34A	0	62.66	20.6	83.26	Legal
826	2013-01-30	2013-01-31	20	F	393070	83160461	SPONTANEOUS VAGINAL DELIVERY	DELIVERY WITH EPISIOTOMY	OBGY34A	0	62.66	21.6	84.26	Legal
827	2013-01-29	2013-01-31	30	F	398818	84385278	SPONTANEOUS VAGINAL DELIVERY	DELIVERY WITH EPISIOTOMY	OBGY34A	0	62.66	19.6	82.26	Legal
828	2013-01-25	2013-01-26	25	F	426045	84227029	SPONTANEOUS VAGINAL DELIVERY WITH EPISIOTOMY	DELIVERY	OBGY34A	0	62.66	13	75.66	Legal
829	2012-12-25	2012-12-26	30	F	421371	85742457	DELIVERY WITH EPISIOTOMY		OBGY34A	0	62.66	5.4	68.06	Legal
830	2012-12-29	2012-12-31	18	F	421946	86683914	SPONTENEOUS VAGINAL EPISIOTOMY	DELIVERY	OBGY34A	0	62.66	17	79.66	Legal
831	2013-01-21	2013-01-25	29	F	375700	16419831	MYOMECTOMY	UTERINE FIBROID	OBGY36A	0	278.98	133.7	412.68	Fraudulent
832	2013-01-21	2013-01-27	37	F	313213	52856419	MYOMECTOMY	UTLERINE FIBROIDS	OBGY36A	0	278.98	90.38	369.36	Legal
833	2013-01-10	2013-01-10	28	F	423061	57670073		POST PARTUM HAEMONHAGE	OBGY38A	0	82.42	35.2	117.62	Fraudulent
834	2013-01-05	2013-01-09	31	F	418559	48781065		POST PARTUM HAEMORRAPHAGE	OBGY38A	0	82.42	57.72	140.14	Fraudulent
835	2013-01-26	2013-01-29	25	F	426146	83583822	SPONTANEOUS VAGINAL DELIVERY	POST PARTUM HAEMARRAGE	OBGY38A	0	82.42	51.64	134.06	Fraudulent
836	2012-01-04	2013-01-06	30	F	407074	86346262	E.O.U	RETAINED PLACENTA	OBGYO6A	0	72.8	12.04	84.84	Legal
837	2012-12-24	2012-12-31	23	F	125510	16391314	DRESSING	DIABETIC FOOT ULCER	OBGYO9A	0	64.09	230.18	294.27	Fraudulent
838	2012-12-31	2013-01-03	14	M	422239	48850337		ACUTE APPENDCSTIS	OBGYO9A	0	64.09	48.09	112.18	Fraudulent
839	2013-01-07	2013-01-10	30	F	366761	16358010		INGUINAL HERNIA	OBGYO9A	0	64.09	47.94	112.03	Fraudulent
840	2013-01-14	2013-01-17	17	F	380901	36471364		INCISIONAL HERNIA	OBGYO9A	0	64.09	58.22	122.31	Fraudulent
841	2013-01-11	2013-01-14	19	F	423567	89902093		APPENDICITIS	OBGYO9A	0	64.09	47.8	111.89	Fraudulent
842	2013-01-09	2013-01-11	33	M	419118	83999164		HERNIA	OBGYO9A	0	64.09	0	64.09	Legal
843	2013-01-12	2013-01-14	31	M	423959	16539675		TENDER EPIGASTRIC MASS	OBGYO9A	0	64.09	33.6	97.69	Fraudulent
844	2012-11-30	2012-12-03	32	F	407838	59397986		ACUTE APPENDICITIS	OBGYO9A	0	64.09	90.94	155.03	Fraudulent
845	2012-12-25	2012-12-27	27	M	421557	68512871		RIGHT INGUINOSCRUTAL HERNIA	OBGYO9A	0	64.09	0	64.09	Legal
846	2012-11-08	2012-11-10	38	M	413594	65577351		HERNIA	OBGYO9A	0	64.09	16.65	80.74	Fraudulent
847	2016-01-01	2016-01-01	55	M	NP-30-13	35174927	ELECTRO THERAPY	LUMBAR SPONDYLASIS	OPDC011D	0	35.7	0	35.7	Fraudulent
848	2013-02-01	2013-02-01	57	F	2013-02-01	28589137	ELECTRO THERAPY	LOWBACK PAIN	OPDC011D	0	35.7	0	35.7	Fraudulent
849	2013-10-12	2013-10-12	45	M	NP-1142-12	84367299	ELECTRO THERAPY	RT KNEE PAIN	OPDC011D	0	35.7	0	35.7	Fraudulent
850	2013-04-01	2013-04-01	49	F	1112-12	16504028	EXERCISE THERAPY	LT ROTATOR CUFF TENDINTIS	OPDC011D	0	35.7	0	35.7	Fraudulent
851	2013-04-01	2013-04-01	58	F	NP-1131-12	61819051	ELECTRO THERAPY	LUMBAR SPONDYLASIS	OPDC011D	0	35.7	0	35.7	Fraudulent
852	2013-04-01	2013-04-01	80	F	NP-1083-12	16365194	ELECTRO THERAPY	FOOT DROP	OPDC011D	0	35.7	0	35.7	Fraudulent
853	2013-02-01	2013-02-01	47	M	NP-1198-12	46800280	ELECTRO THERAPY	RT BELLS PALSY	OPDC011D	0	35.7	0	35.7	Fraudulent
854	2013-09-01	2013-09-01	46	M	1198-12	46800280	ELECTRO THERAPY	RT BELLS PALSY	OPDC011D	0	35.7	0	35.7	Fraudulent
855	2013-07-01	2013-07-01	56	M	NP-10-13	63601641	EXERCISE THERAPY	CVA	OPDC011D	0	35.7	0	35.7	Fraudulent
856	2013-01-02	2013-01-02	37	F	420360	71308868			OPDC02A	81	13.27	4.79	18.06	Legal
857	2013-01-02	2013-01-02	23	F	413387	58619682			OPDC02A	81	13.27	0.66	13.93	Legal
858	2013-01-02	2013-01-02	35	F	412327	16471821			OPDC02A	81	13.27	0.66	13.93	Legal
859	2013-01-02	2013-01-02	20	F	420905	72688881			OPDC02A	81	13.27	0.72	13.99	Legal
860	2013-01-02	2013-01-02	26	F	420930	85469119			OPDC02A	81	13.27	0.72	13.99	Legal
861	2013-01-02	2013-01-02	37	F	406427	64891020			OPDC02A	81	13.27	0.72	13.99	Legal
862	1-14-2013	1-14-2013	16	F	0176-13	16412963	ANTIBIATIC	APICAL PERIODONTITIS	OPDC03A	0	4.88	1.5	6.38	Legal
863	1-14-2013	1-14-2013	57	M	0187-12	84473657	ANTIBIATIC	APICAL PERIODONTITIS	OPDC03A	0	4.88	1.5	6.38	Legal
864	1-14-2013	1-14-2013	48	F	1903-11	16539191	CARIES	APICAL PERIODONTITIS	OPDC03A	0	4.88	1.5	6.38	Legal
865	1-14-2013	1-14-2013	32	M	0171-13	65643315	ANTIBIATIC	APICAL PERIODONTITIS	OPDC03A	0	4.88	1.5	6.38	Legal
866	1-14-2013	1-14-2013	37	F	3543-12	66064338	ANTIBIATIC	APICAL PERIODONTITIS	OPDC03A	0	4.88	1.5	6.38	Legal
867	2013-03-01	2013-03-01	15	F	399684	82207956			OPDC04A	0	5.81	24.7	30.51	Fraudulent
868	2013-03-01	2013-03-01	2	M	422559	70943081			OPDC04A	0	5.54	12	17.54	Fraudulent
869	2013-02-01	2013-02-01	16	M	422416	15670534			OPDC04A	0	5.81	4.9	10.71	Legal
870	2013-02-01	2013-02-01	9	F	422415	44891004			OPDC04A	0	5.54	3.62	9.16	Legal
871	2013-08-01	2013-08-01	60	F	5211-12	16423807			OPDC05A	0	6.35	4	10.35	Legal
872	2013-08-01	2013-08-01	50	F	0801-12	33605694			OPDC05A	0	6.34	6.4	12.74	Fraudulent
873	2013-08-01	2013-08-01	7	M	108-13	80893531			OPDC05C	0	6.15	5.3	11.45	Fraudulent
874	2013-10-01	2013-10-01	10	F	3781-11	16496585			OPDC05C	0	6.15	2.1	8.25	Legal
875	1-31-2013	1-31-2013	2	F	6524-12	67966522			OPDC05C	0	6.15	0	6.15	Legal
876	1-22-2013	1-22-2013	5	M	6491-123	85288439			OPDC05C	0	6.15	0	6.15	Legal
877	1-22-2013	1-22-2013	5	F	2457-12	86597914			OPDC05C	0	6.15	0	6.15	Legal
878	2013-01-04	2013-01-04	15	M	92582	48746896			OPDC06A	0	6.16	5.7	11.86	Fraudulent
879	2013-01-04	2013-01-04	46	F	239879	68183434			OPDC06A	0	6.16	1.8	7.96	Legal
880	2013-01-04	2013-01-04	25	F	243574	58418306			OPDC06A	0	6.16	0.06	6.22	Legal
881	2013-01-07	2013-01-07	63	M	420085	38156668			OPDC06A	0	9.66	0.9	10.56	Legal
882	2013-01-07	2013-01-07	46	M	423174	65476015			OPDC06A	0	6.16	18.6	24.76	Fraudulent
883	2013-01-07	2013-01-07	47	F	371000	56309603			OPDC06A	0	6.16	0.06	6.22	Legal
884	2013-01-07	2013-01-07	21	F	411653	16305891			OPDC06A	0	6.16	0.06	6.22	Legal
885	2013-01-08	2013-01-08	16	M	387628	37002325			OPDC06A	0	6.16	11.6	17.76	Fraudulent
886	2013-01-08	2013-01-08	83	F	403568	16497497			OPDC06A	0	6.16	14.1	20.26	Fraudulent
887	2012-12-28	2012-12-30	64	M	421574	15547673		HYPERTENSION	OPDC0A	0	90.22	0	90.22	Fraudulent
888	2012-12-24	2012-12-28	43	M	418464	89313091		CEREBRO VASCULAR ACCIDENT	OPDC0A	0	128.18	84	212.18	Fraudulent
889	2012-11-28	2012-12-26	50	F	417232	88526955	INCISION DAMAGE&DEBRIDEMENT	CELLULITIS RT LEG	OPDC0A	0	141.44	309.22	450.66	Fraudulent
890	2013-11-01	2013-11-01	52	M	0154-13	16809210	CANULLTAL	CARIES	OPDOC3A	0	4.88	5.4	10.28	Legal
891	2013-07-01	2013-07-01	8	M	0085-12	16393330	MEDICATION	APICAL PERIODONTITIS	OPDOC3A	0	4.88	8.63	13.51	Fraudulent
892	2013-07-01	2013-07-01	30	F	0066-13	16462033	ANTIBIATIC	CARIES	OPDOC3A	0	4.88	1.5	6.38	Legal
893	2013-07-01	2013-07-01	84	F	0068-13	16493572	ANTIBIATIC	CARIES	OPDOC3A	0	4.88	1.5	6.38	Legal
894	2013-08-01	2013-08-01	22	F	0107-13	16421444	ANTIBIATIC	PERIODONTITIS	OPDOC3A	0	4.88	5.42	10.3	Legal
895	2013-12-01	2013-12-01	53	F	421319	66845996	BANDAGING	FRACTURED	ORTH01A	0	38.48	0	38.48	Legal
896	12-20-2012	12-20-2012	30	F	420584	45796631	BANDAGING		ORTH01A	0	38.48	0	38.48	Legal
897	12-24-2012	12-24-2012	53	M	311009	66208775	BANDAGING	FRACTURE	ORTH01A	0	49.14	0	49.14	Legal
898	1-29-2013	1-29-2013	3	M	342118	71868280	BANDAGING		ORTH01C	0	46.02	0	46.02	Legal
899	2013-11-01	2013-11-01	27	M	423902	86691577	BANDAGING	MODERATE HEAD INJURY	ORTH01C	0	38.48	0	38.48	Legal
900	1-14-2013	1-14-2013	24	M	424054	68436899	BANDAGING	RIGHT ACETABULAR FRACTURE	ORTH01C	0	36.14	0	36.14	Legal
901	12-27-2012	12-27-2012	22	M	421625	82634617	BANDAGING		ORTH01C	0	36.14	0	36.14	Legal
902	12-24-2012	12-24-2012	47	M	405648	81940438	BANDAGING		ORTH01C	0	46.02	0	46.02	Legal
903	11-22-2012	11-22-2012	7	M	416590	67741157	BANDAGING		ORTH01C	0	46.02	3.4	49.42	Legal
904	11-19-2012	11-19-2012	27	M	416227	80644823	BANDAGING		ORTH01C	0	36.14	0.35	36.49	Legal
905	2013-03-01	2013-03-01	55	F	4201830	16507995	CLOSED REDUCTION	DISPLACE RADAIL	ORTH04A	0	244.01	0	244.01	Legal
906	12-22-2012	12-22-2012	54	F	420830	16507995	CLOSED REDUCTION	RT RAPLIAL	ORTH04A	0	244.01	0	244.01	Legal
907	12-24-2012	12-24-2012	61	F	337859	73893215	CLOSED REDUCTION	TIBIA FRACTURE	ORTH04A	0	340.99	0	340.99	Legal
908	12-22-2012	12-22-2012	37	F	418957	16429615	CLOSED REDUCTION		ORTH04A	0	340.99	0	340.99	Legal
909	2012-06-12	2012-06-12	2	F	306735	84559868	CLOSED REDUCTION OF FRACTURE	FRACTURE	ORTH04C	0	205.66	0	205.66	Legal
910	1-26-2013	1-26-2013	33	M	426121	82379615	DRESSING	LAC LT EYE BOW	ORTH06A	0	19.5	30.94	50.44	Fraudulent
911	2012-01-12	2012-01-12	29	F	418007	44164543	DRESSING		ORTH06A	0	17.16	0	17.16	Legal
912	12-30-2012	12-30-2012	22	M	422013	85887709	DRESSING		ORTH06A	0	17.16	0	17.16	Legal
913	11-16-2012	11-16-2012	40	M	415747	82737972	DRESSING		ORTH06A	0	17.16	0.35	17.51	Legal
914	2012-11-24	2012-11-29	33	M	416854	51942568	DRESSING	DRESSING AND MINOR SROTURING	ORTH06A	0	19.5	0	19.5	Legal
915	1-24-2013	1-24-2013	7	M	425579	56675747	DRESSING	MODERATE HEAD INJURY	ORTH06C	0	15.73	17.22	32.95	Fraudulent
916	2013-04-01	2013-04-01	53	F	407729	61383313	MCISI	ABSCESS	ORTH07A	0	85.93	0.7	86.63	Legal
917	12-18-2012	12-18-2012	63	F	399906	16447523	EXCISTION		ORTH07A	0	85.93	0	85.93	Legal
918	12-27-2012	12-27-2012	32	M	421268	81363087	EXCISTION		ORTH07A	0	85.93	0	85.93	Legal
919	2013-08-01	2013-08-01	24	F	363272	53381522	INASIAN AND DRESSING	ADSCESS LT THURB	ORTH11A	0	123.24	10.3	133.54	Legal
920	2012-01-02	2013-01-21	7	M	422488	81236976		FRACTURE OF TIBA/FIBIELAR	ORTH12C	0	361.53	34.89	396.42	Legal
921	2012-12-26	2013-01-18	13	F	420480	43887013	ABOVE KNEE AMPITATION	AMPUTSTION	ORTH21A	0	368.94	274.99	643.93	Fraudulent
922	2012-11-01	2012-12-27	72	M	412907	16422223	RIGHT ABOVEL. AMPUTATIVE	DIABETIC FOOT ULCER	ORTH21A	0	368.94	643.83	1	Fraudulent
923	2012-11-22	2012-12-21	63	M	365667	16510280	AMPUTATION	DIABETIC GARGRENOUS FOOT	ORTH21A	0	368.94	359.41	728.35	Fraudulent
924	2012-11-03	2013-01-04	28	M	413850	86144989	FASCIOTOMY	SUPERFICIAL BURNS	ORTHO9A	0	412.75	40.78	453.53	Fraudulent
925	2013-01-01	2013-01-21	28	M	369874	45896728	FASCIOTOMY	BURNS	ORTHO9A	0	412.75	28.7	441.45	Fraudulent
926	2012-12-31	2013-01-04	37	M	421276	25165445	FASCIOTOMY	SUPERFICIAL BURNS	ORTHO9A	0	412.75	23.7	436.45	Legal
927	2013-01-02	2013-01-21	64	F	125510	16391314	ABOVE KNEE AMPITATION		ORTHO9A	202	368.94	337	705.94	Fraudulent
928	2013-01-04	2013-01-14	9	F	419752	84807161		MALNUTRITION	PAED05C	0	98.93	3.46	102.39	Legal
929	2013-01-04	2013-01-12	10	F	399456	17619706		ANAMIA	PAED06C	0	113.62	24.2	137.82	Legal
930	2013-01-03	2013-01-07	1	F	422577	75307310		SEVERE ANAEMIA	PAED06C	0	113.62	1.3	114.92	Legal
931	2013-01-18	2013-01-20	2	M	425043	76533007		SEVERE ANAEMIA	PAED06C	0	113.62	15.28	128.9	Legal
932	2012-12-30	2013-01-01	3	F	422231	89166022		NEONATAL JUNCDICE	PAED09C	0	125.32	4.68	130	Legal
933	2013-01-12	2013-01-15	4	F	423969	69636535		NEONATAL JEURDURY	PAED09C	125	125.32	0.7	126.02	Legal
934	2013-01-21	2013-01-21	5	F	425394	87149399		NECRATAL SANDICE	PAED09C	0	125.32	0	125.32	Legal
935	2012-12-05	2012-12-07	1	F	418577	56181479		NEONATAL JAUNDICE	PAED09C	0	125.32	0	125.32	Legal
936	2013-01-03	2013-01-11	5DY	F	422677	83010443		NEONATAL JAUNDICE	PAED09H	0	125.32	8.7	134.02	Fraudulent
937	2013-01-05	2013-01-07	1	F	422810	82971515		PRETERM	PAED10C	0	197.34	2.65	199.99	Legal
938	2013-01-02	2013-01-07	2	F	418167	87466621		PRETERM	PAED10C	0	197.34	1.4	198.74	Legal
939	2013-01-28	2013-01-30	1	F	426691	84232128		NEAR TERM NEONATE	PAED10C	0	197.34	2.65	199.99	Legal
940	2013-01-03	2013-01-05	3	F	418201	58201183		LEFT HEART ABSCESS	PAED10C	0	197.34	3.95	201.29	Legal
941	2012-11-10	2012-11-13	1	F	414998	62877113		MATERNAL BLOOD ASPIRATION	PAED12C	0	119.73	3.15	122.88	Legal
942	2012-12-22	2012-12-27	1	F	420994	87916006		SEVERE BIRTH ASPHYK	PAED12C	0	119.73	6.15	125.88	Legal
943	2013-01-04	2013-01-09	2	F	422831	67492893		RESPIRATERY DISTRESS	PAED13C	0	249.99	4.6	254.59	Legal
944	2012-12-31	2013-01-10	1	F	422252	82603955		NEONATAL SEPSIS	PAED14C	0	202.28	2.65	204.93	Legal
945	2013-01-18	2013-01-22	2	F	422371	89592971		NEONATAI SEPSIS	PAED14C	0	202.28	0.7	202.98	Legal
946	2013-01-15	2013-01-22	1	F	424436	56975613		NEONATAL SEPSIS	PAED14C	0	202.28	9.3	211.58	Legal
947	2013-01-18	2013-01-22	5	F	424972	88538622		SIPSIS	PAED18C	0	202.28	3.35	205.63	Legal
948	2013-12-31	2013-01-03	2	F	422215	81567105		SIPSIS	PAED18C	0	202.28	2.55	204.83	Legal
949	2013-01-18	2013-01-28	1DY	F	425048	64191292		SEVERE HYPOXIC	PAED18C	693	210.86	6.6	217.46	Legal
950	2013-01-20	2013-01-22	7	F	282456	64195262		SEIZURE DISORDERS	PAED20C	0	104.52	14.72	119.24	Legal
951	2013-01-29	2013-01-31	1	M	419018	74843003		FEBRILE CONVULSION	PAED20C	0	104.52	62.5	167.02	Legal
952	2013-01-12	2013-01-14	5	M	287349	63701101		SEIZURE DISORDER	PAED20C	0	104.52	8.3	112.82	Legal
953	2013-01-08	2013-01-14	5	M	423351	67376084		FESRIH CONVULSION	PAED20C	0	104.52	17.9	122.42	Legal
954	2013-01-03	2013-01-06	4	M	231189	58069693		SICKLE CELL DISEASE	PAED24C	0	170.43	13.72	184.15	Legal
955	2013-01-22	2013-01-27	5	F	379672	56638213		VASO-OCCLUSIVE CRISIS	PAED24C	0	170.43	42.96	213.39	Legal
956	2013-01-15	2013-01-17	12	F	40553	16432710		SICKLE CELL DISEASE	PAED24C	0	170.43	26.89	197.32	Legal
957	2012-12-28	2012-12-31	4	F	412470	84347076		CEPHALHAMATOMA	PAED25C	0	217.49	2.85	220.34	Legal
958	2012-11-22	2012-11-26	1	F	417009	80737009		NEONSTAL SEPSIS	PAED25C	0	202.28	1.6	203.88	Legal
959	2013-01-22	2013-01-25	5	M	425519	87283706		SKIN DISEASE	PAED26C	0	171.6	16.3	187.9	Legal
960	2013-01-23	2013-01-25	5	M	425519	87281211		SKIN DISEASE	PAED26C	0	171.6	14.56	186.16	Legal
961	2013-01-10	2013-01-13	7	F	318282	24771449		LEFT LABOR PNEUMONIA	PAED28C	0	130	33.05	163.05	Legal
962	2013-01-02	2013-01-04	8	F	215146	16420437		ACUTE ASTHMATIC ALTUELE	PAED30C	0	68.9	16.24	85.14	Legal
963	2013-01-12	2013-01-14	1	M	410816	78896228		VIRAL GASTROENTERITIS	PAED31C	0	96.98	10.31	107.29	Legal
964	2013-01-13	2013-01-15	3	F	424061	64336360		GASTROEUTETY	PAED31C	0	96.98	2.33	99.31	Legal
965	2012-12-31	2013-01-02	2	M	347226	65456193		MALARIA	PAED36C	0	32.24	12.7	44.94	Legal
966	2013-01-17	2013-01-19	2	M	424916	85435103		MALARIA	PAED36C	0	32.24	21	53.24	Legal
967	2013-01-17	2013-01-27	8	M	422059	81726046		SEVERE MALARIA	PAED37C	0	106.21	42.37	148.58	Legal
968	2013-01-01	2013-01-03	1	F	422533	83263638		LATE PRETERM	PAED37C	0	197.34	0.06	197.4	Legal
969	2012-11-25	2012-11-29	1	M	416954	78745332		MALARIA	PAED37C	0	137.67	27.91	165.58	Legal
970	2013-01-08	2013-01-20	11	F	422801	89084073		BRONCHOPNEUMONIA	PAED38C	0	130	38.8	168.8	Legal
971	2013-01-09	2013-01-13	7	M	423532	84001315		SEPSIS	PAED38C	0	130	26.26	156.26	Legal
972	2013-01-03	2013-01-07	1	F	422543	89597618		BRONCHOPNEUMONIA	PAED38C	0	197.6	4.86	202.46	Legal
973	2013-01-13	2013-01-15	2	M	406122	63720787		RIGHT OTITIS MEDIA	PAED39C	0	56.42	63.17	119.59	Fraudulent
974	2013-01-05	2013-01-14	1	F	418497	80146157		BRONCHITIS	PAED39C	0	56.42	3.7	60.12	Legal
975	2013-01-23	2013-01-26	1	F	425742	85479808		BULLOUS IMPETIGO	PAED39C	0	63.83	2.15	65.98	Legal
976	2013-01-17	2013-01-25	2	F	424737	66224533		RETROVIRAL INFECTION	PAED45C	0	246.48	15.12	261.6	Legal
977	2013-01-21	2013-01-25	7	M	425305	85318455		RETROVIRAL INFECTION	PAED45C	0	246.48	15.56	262.04	Legal
978	2012-12-26	2013-01-02	1	F	422402	86492801		PRETERM	PAEDI0C	0	197.34	4.55	201.89	Fraudulent
979	2013-01-01	2013-01-03	1	F	422454	64241072		PREMATURITY	PAEDI0C	0	197.34	3.95	201.29	Fraudulent
980	2013-01-02	2013-01-05	1	F	422373	61383110		MILDBIRTH ASPHYXIA	PAEDI2C	0	119.73	5.45	125.18	Legal
981	2013-01-03	2013-01-05	3	M	422646	82707707		BIRTH ASPHYXIA	PAEDI2C	0	119.73	2.55	122.28	Legal
982	2012-12-31	2013-01-03	3	F	394136	83876856		ENCEPHALOPATHY	PAEDI2C	0	119.73	1.95	121.68	Legal
983	2012-12-29	2013-01-03	5	F	422395	81457030		NEONATAL SEPSIS	PAEDI4C	0	202.28	2.55	204.83	Fraudulent
984	2013-01-03	2013-01-10	DD	F	421487	81530441		NEONATAL SEPSIS	PAEDI4C	0	202.28	4.98	207.26	Fraudulent
985	2012-12-13	2013-01-06	2	F	284228	88824803		SEVERE ACUTE MALNUTRITION	PAEDO5C	0	98.93	12.94	111.87	Legal
986	2012-12-30	2013-01-05	8	M	422059	81726046		ANAEMIA	PAEDO6C	0	155.48	26.96	182.44	Legal
987	2013-01-12	2013-01-18	4	F	119243	16853970		BURNS	PSUR27C	0	644.15	61.57	705.72	Fraudulent
988	2013-06-01	2013-06-01	41	M	423093	83270806			ZOOM02A	0	8.66	8.92	17.58	Legal
989	2013-09-01	2013-09-01	21	M	25994	16356550			ZOOM02A	0	8.66	42.51	51.17	Fraudulent
990	1-15-2013	1-15-2013	40	M	424118	55946249			ZOOM02A	0	8.66	125.39	134.05	Fraudulent
991	2013-01-01	2013-01-01	2	M	422320	80418870			ZOOM02C	0	11.48	12.9	24.38	Fraudulent
992	2013-07-01	2013-07-01	2	M	423187	70495368			ZOOM02C	0	11.48	8.6	20.08	Fraudulent
993	1-21-2013	1-21-2013	10	F	221041	16485517			ZOOM02C	0	7.6	4	11.6	Legal
994	2013-11-01	2013-11-01	80	F	358726	53377406			ZOOMO2A	0	13.03	0	13.03	Legal
995	2013-01-01	2013-01-01	46	M	422260	66383837			ZOOMO2A	0	8.66	22.3	30.96	Fraudulent
996	2013-01-01	2013-01-01	70	M	421590	86752903			ZOOMO2A	0	8.66	79.82	88.48	Fraudulent
997	2013-07-01	2013-07-01	35	F	416192	82057154			ZOOMO2A	0	8.66	0.18	8.84	Legal
998	1-28-2013	1-28-2013	66	F	426358	45162086			ZOOMO2A	0	8.66	11.6	20.26	Fraudulent
999	2013-02-01	2013-02-01	2	F	422285	16465609			ZOOMO2C	0	7.6	11.75	19.35	Fraudulent
1000	1-22-2013	1-22-2013	7	M	425434	61199776			ZOOMO2C	0	7.6	36.91	44.51	Fraudulent
