# Supplementary material for: Decision Support System (DSS) for Fraud Detection in Health Insurance Claims Using Genetic Support Vector Machines (GSVMs)
Source: Hindawi journal article supplement (doi:10.1155/2019/1432597), 2019-09-02
Supplement: f1 [file 1432597.f1.zip › 1432597.f1/ReData300_1.xlsx]

## Sheet: Sheet1
No.	Attendance Date	Discharge Date	Age	Sex	Folder No	NHIS ID No	Procudure	Diagnosis	G-DRG	ICD10	Service	Medical	Total	Output
1	2012-11-22	2012-12-20	37	M	410390	78739282	INCISION DAMAGE&DEBRIDEMENT	DIABETIC FOOT(RT)	ASUR31A	T.73.9	141.44	258.34	399.78	Legal
2	2012-12-25	2012-12-31	22	F	421455	66989440	LAPAROLONY	ABDOMIAL TRIRY 2 FRAUMA	ASUR08A	T14.0	332.02	91.2	423.22	Legal
3	2013-01-21	2013-01-28	38	F	46489	63313932	THYRIODECTOMY	TOXIC MULTINODULER GOITRE	ASUR01A	D44.0	339.04	71.38	410.42	Legal
4	2013-01-03	2013-01-08	21	F	69363	16437273	APPENCEMTOMY	ACUTE APPENDCSTIS	ASUR08A	K37.7	332.02	132.2	464.22	Legal
5	2013-01-03	2013-01-11	32	F	270830	16369104	LAPAROTOMY	APPENDICITIS	ASUR08A	K37.7	332.02	110.05	442.07	Legal
6	2013-01-04	2013-01-14	32	F	422671	71258176	LAPAROTOMY	APPENDICITIS	ASUR08A	K37.7	332.02	213.1	545.12	Fraudulent
7	2013-01-16	2013-01-25	38	M	424538	89745566	LAPAROTOMY	PERITONITIS	ASUR08A	K65.9	332.02	78.84	410.86	Legal
8	2013-01-06	2013-01-11	14	M	423000	47979145	APPENCEMTOMY	ACUTE APPENDCSTIS	ASUR08A	K37.7	332.02	39.5	371.52	Legal
9	2013-12-30	2013-01-02	39	M	422066	16422413	APPENCEMTOMY	APPENDICITIS	ASUR08A	K37.7	332.02	39.7	371.72	Legal
10	2013-01-12	2013-01-25	52	F	62002	55060951	APPENCEMTOMY	APPENDICITIS	ASUR08A	K37.7	332.02	74.04	406.06	Legal
11	2013-01-14	2013-01-16	15	M	424033	61273367	APPENCEMTOMY	APPENDICITIS	ASUR08A	K37.7	332.02	101.74	433.76	Legal
12	2013-01-09	2013-01-11	26	F	422659	71979225		PERFIRATION	ASUR09A	A01.0	64.09	46.24	110.33	Legal
13	2013-01-18	2013-01-22	49	M	228713	16467451		ACUTE EPIDIDYMO	ASUR09A		64.09	29.04	93.13	Legal
14	2013-01-20	2013-01-23	69	M	425175	77858288		VARICEAL BLEEDING	ASUR09A	I85.9	64.09	13.74	77.83	Legal
15	2013-01-03	2013-01-06	34	M	420296	85334094	HERNIA REPAIR HYDROCELECTOMY	MESENTERIC HERNIA	ASUR19A	R46.9	267.8	57.95	325.75	Legal
16	2013-01-08	2013-01-10	18	F	423260	69264801	HERMORRHAPHY	STRANGULATED FERNORAL HERNIA	ASUR19A	K46.9	267.8	48.34	316.14	Fraudulent
17	2013-01-03	2013-01-09	48	F	423109	16429713	HERMORRHAPHY	PARAUMBILICAL	ASUR20A	K42.9	144.82	63.22	208.04	Legal
18	2013-01-29	2013-01-31	80	M	422093	79413422	HERNMORRAPHY	RIGHT HIGUNIAL HERNIPLAPHY	ASUR20A	K40.9	144.82	71.14	215.96	Legal
19	2013-01-21	2013-01-25	78	M	421333	17073387	HERMORRHAPHY	INGMINAL HERNIA	ASUR20A	K40.9	144.82	33.3	178.12	Legal
20	2013-01-03	2013-01-21	68	M	141891	26922133	PROSTATESTOMY	BENING PROSTATIC HYPERTROPHY	ASUR21A	N40	478.14	76.8	554.94	Legal
21	2013-01-20	2013-01-25	58	M	425185	82879407	SURGERY ON SCROTUM	TORSION OF TESTIS	ASUR22A	N44	126.1	59.54	185.64	Legal
22	2013-01-03	2013-01-11	50	M	18919	16370459	INCISUN AND DRIANAGE	PALMER ABSCESS	ASUR31A	L02.9	141.44	160.24	301.68	Fraudulent
23	2013-01-08	2013-01-19	35	F	423402	60381032	DEBRIDEMRNT	SEPTIC WOUND	ASUR31A	T79.30	141.44	356.4	497.84	Fraudulent
24	2013-02-01	2013-02-01	42	M	420750	58454715	EXTRACTION	CAVIES	DENT01A		15.47	1.5	16.97	Legal
25	1-14-2013	1-14-2013	68	F	0174-12	89210371	EXTRACTION	PERIODONTITIS	DENT01A		15.47	1.5	16.97	Legal
26	1-14-2013	1-14-2013	22	M	0189-13	37344100	ANTIBIATIC	APICAL PERIODONTITIS	DENT01A		15.47	1.5	16.97	Legal
27	1-14-2013	1-14-2013	48	F	3721-11	16420425	EXTRACTION	APICAL PERIODONTITIS	DENT01A		15.47	1.5	16.97	Legal
28	1-14-2013	1-14-2013	58	F	0177-13	68013739	EXTRACTION	APICAL PERIODONTITIS	DENT01A		15.47	5.42	20.89	Legal
29	1-14-2013	1-14-2013	54	F	3587-11	10133465	EXTRACTION	APICAL PERIODONTITIS	DENT01A		15.47	1.5	16.97	Legal
30	1-14-2013	1-14-2013	12	F	4122-12	15553534	EXTRACTION	CARIES	DENT01A		14.95	0.9	15.85	Legal
31	2013-07-01	2013-07-01	39	M	0076-12	68547278	EXTRACTION	PERIODONTITIS	DENT01A		15.47	5.42	20.89	Legal
32	2013-07-01	2013-07-01	81	M	3842-12	15605606	EXTRACTION	PERIODONTITIS	DENT01A		15.47	1.5	16.97	Legal
33	2013-10-01	2013-10-01	19	M	91113	16519546	EXTRACTION	CARIES	DENT01A		15.47	1.5	16.97	Legal
34	2013-09-01	2013-09-01	9	M	0124-13	16397879	EXTRACTION	CARIES	DENT01A		14.95	13.48	28.43	Fraudulent
35	2013-09-01	2013-09-01	27	F	0036-13	16472866	EXTRACTION	CARIES	DENT01A		15.47	1.5	16.97	Legal
36	2013-09-01	2013-09-01	38	F	4403-12	16483507	EXTRACTION	CARIES	DENT01A		15.47	1.5	16.97	Legal
37	2013-09-01	2013-09-01	71	M	0020-13	16525901	EXTRACTION	DCAR	DENT01A		15.47	16.08	31.55	Fraudulent
38	2013-10-01	2013-10-01	27	F	3226-11	16350639	EXTRACTION	CARIES	DENT01A		15.47	1.5	16.97	Legal
39	2013-10-01	2013-10-01	53	M	0239-11	16382055	EXTRACTION	FRACTURE TOOTH	DENT01A		15.47	1.5	16.97	Legal
40	2013-11-01	2013-11-01	9	M	0149-13	57546345	EXTRACTION	RETAINED ROOT	DENT01A		14.95	2.3	17.25	Legal
41	2013-11-01	2013-11-01	7	M	0150-13	67918007	EXTRACTION	RETAINED ROOT	DENT01A		14.95	2.3	17.25	Legal
42	2013-11-01	2013-11-01	11	F	0151-13	16437433	EXTRACTION	CARIES	DENT01A		14.95	2.3	17.25	Legal
43	2013-11-01	2013-11-01	29	F	3985-09	75155475	CURETAGE OF DRY SOCKET	DRY SOCKET	DENT01A		150.28	1.5	151.78	Fraudulent
44	2013-11-01	2013-11-01	17	F	0071-13	68532773	EXTRACTION	RETAINED ROOT	DENT01A		15.47	0.9	16.37	Legal
45	2013-11-01	2013-11-01	41	F	4603-12	59701585	EXTRACTION	APICAL PERIODONTITIS	DENT01A		15.47	12.1	27.57	Fraudulent
46	2013-08-01	2013-08-01	55	F	0110-13	16429706	EXTRACTION	PERIODONTITIS	DENT01A		15.47	1.5	16.97	Legal
47	2013-08-01	2013-08-01	28	M	4238-12	84667829	EXTRACTION	CARIES	DENT01A		15.47	2.8	18.27	Legal
48	2013-07-01	2013-07-01	11	F	0072-13	15605526	EXTRACTION	CARIES	DENT01A		14.95	0.9	15.85	Legal
49	2013-07-01	2013-07-01	7	M	0073-12	15605527	EXTRACTION	CARIES	DENT01A		14.95	2.3	17.25	Legal
50	2013-07-01	2013-07-01	39	F	3395-11	84312283	EXTRACTION	PERIODONTITIS	DENT01A		15.47	1.5	16.97	Legal
51	2013-07-01	2013-07-01	43	M	0069-13	66806185	EXTRACTION	PERIODONTITIS	DENT01A		15.47	1.5	16.97	Legal
52	2013-07-01	2013-07-01	45	F	0083-13	16380545	EXTRACTION	CARIES	DENT01A		15.47	1.5	16.97	Legal
53	2013-07-01	2013-07-01	43	F	4870-12	66895410	EXTRACTION	CARIES	DENT01A		15.47	1.5	16.97	Legal
54	2013-07-01	2013-07-01	11	F	0059-13	15973279	EXTRACTION	RETAINED ROOT	DENT01A		14.95	1.5	16.45	Legal
55	2013-04-01	2013-04-01	39	F	4789-12	16379069	EXTRACTION	CARIES	DENT01A		15.47	1.5	16.97	Legal
56	2013-08-01	2013-08-01	38	F	4934-12	84164038	EXTRACTION	CARIES	DENT01A		15.47	1.5	16.97	Legal
57	2013-08-01	2013-08-01	4	M	3508-12	77881118	EXTRACTION	CARIES	DENT01A		15.47	8	23.47	Legal
58	2013-03-01	2013-03-01	12	M	4920-12	16442884	EXTRACTION	CARIES	DENT01A		14.95	0.9	15.85	Legal
59	2013-03-01	2013-03-01	44	F	3796-10	60398897	CURETTAGE OF SOCKET		DENT01A		150.28	0.96	151.24	Fraudulent
60	2013-03-01	2013-03-01	42	F	1861-12	61382488	EXTRACTION	PERIODONTITIS	DENT01A		15.47	1.5	16.97	Legal
61	2013-03-01	2013-03-01	86	M	4919-12	44390875	EXTRACTION	CARIES	DENT01A		15.47	1.5	16.97	Legal
62	1-18-2013	1-18-2013	28	M	0213-13	60857955	EXTRACTION	DENTOALVEOLAR	DENT01A		15.47	5.42	20.89	Legal
63	1-17-2013	1-17-2013	66	F	2582-08	16408912	EXTRACTION	APICAL PERIODONTITIS	DENT01A		15.47	1.8	17.27	Legal
64	1-17-2013	1-17-2013	67	F	0222-13	68313060	EXTRACTION	APICAL PERIODONTITIS	DENT01A		15.47	15.96	31.43	Fraudulent
65	1-17-2013	1-17-2013	18	M	0191-13	41859590	EXTRACTION	APICAL PERIODONTITIS	DENT01A		15.47	0.9	16.37	Legal
66	1-23-2013	1-23-2013	62	M		52852741			INVES		8.26		8.26	Fraudulent
67	2013-10-01	2013-10-01	56	M		37555883			INVES16E		1.98		1.98	Fraudulent
68	2013-04-01	2013-04-01	21	M		83507927			INVES21D		5.95		5.95	Fraudulent
69	2013-02-01	2013-02-01	32	F		57459068			INVES21D		5.95		5.95	Fraudulent
70	2013-03-01	2013-03-01	36	F		67899544			INVES24D		6.92		6.92	Fraudulent
71	1-15-2013	1-15-2013	36	F		15115077			INVES24D		6.92		6.92	Fraudulent
72	2013-07-01	2013-07-01	56	F		16509239			INVES27E		3.04		3.04	Fraudulent
73	2013-03-01	2013-03-01	17	F		16503921			INVES41D		3.17		3.17	Fraudulent
74	1-21-2013	1-21-2013	65	F		16527414			INVES41D		3.17		3.17	Fraudulent
75	1-22-2013	1-22-2013	35	F		16374496			INVES41D		3.17		3.17	Fraudulent
76	1-22-2013	1-22-2013	72	F		38000184			INVES41D		3.17		3.17	Fraudulent
77	1-24-2013	1-24-2013	4	F		66664142			INVES41D		12.09		12.09	Fraudulent
78	1-18-2013	1-18-2013	54	M		52816434			INVES58D		12.09		12.09	Fraudulent
79	1-16-2013	1-16-2013	67	F		56694726			INVES58D		12.09		12.09	Fraudulent
80	1-16-2013	1-16-2013	68	F		15584735			INVES58D		12.09		12.09	Fraudulent
81	1-16-2013	1-16-2013	17	M		67132608			INVES58D		12.09		12.09	Fraudulent
82	2013-09-01	2013-09-01	36	F		48641475			INVES58D		12.09		12.09	Fraudulent
83	2013-07-01	2013-07-01	63	M		16511337			INVES58D		12.09		12.09	Fraudulent
84	2013-04-01	2013-04-01	59	F		16393830			INVES75D		7.28		7.28	Fraudulent
85	2013-02-01	2013-02-01	22	M		62689854			INVES75D		7.28		7.28	Fraudulent
86	2013-03-01	2013-03-01	58	F		63056129			INVES75D		7.28		7.28	Fraudulent
87	2013-04-01	2013-04-01	63	F		16444597			INVES75D		7.28		7.28	Fraudulent
88	1-15-2013	1-15-2013	63	F		16451103			INVES75D		7.28		7.28	Fraudulent
89	1-24-2013	1-24-2013	73	M		16439445			INVES75D		7.28		7.28	Fraudulent
90	1-22-2013	1-22-2013	54	F		53546959			INVES75D		7.28		7.28	Fraudulent
91	1-21-2013	1-21-2013	51	M		16512118			INVES75D		7.28		7.28	Fraudulent
92	1-22-2013	1-22-2013	50	M		67923809			INVES75D		7.28		7.28	Fraudulent
93	2013-02-01	2013-02-01	71	F		85965128			INVES89D		12.09		12.09	Fraudulent
94	2013-02-01	2013-02-01	57	F		61935875			INVES89D		12.09		12.09	Fraudulent
95	2013-08-01	2013-08-01	49	F		48431100			INVES89D		12.09		12.09	Fraudulent
96	2013-08-01	2013-08-01	69	M		67654684			INVES89D		12.09		12.09	Fraudulent
97	2013-04-01	2013-04-01	60	F		85372758			INVES89D		12.09		12.09	Fraudulent
98	2013-04-01	2013-04-01	39	M		80765363			INVES89D		12.09		12.09	Fraudulent
99	2013-04-01	2013-04-01	64	F		47607044			INVES89D		12.09		12.09	Fraudulent
100	1-23-2013	1-26-2013	87	F	129085	16423899		HYPERGLYCAEMIA	MED102A	E14	190.45	44.05	234.5	Fraudulent
101	1-15-2013	1-22-2013	51	M	416597	78535114		HYPERGLYCAEMIA	MED103A	E87.0	190.45	61.5	251.95	Legal
102	1-20-2013	1-23-2013	75	M	422968	61308950		ANAEMIA	MED106A	D50.9	128.83	5.8	134.63	Legal
103	1-25-2013	1-28-2013	33	F	269866	67135672		S. ANAEMIA	MED106A	D51.9	128.83	32.86	161.69	Legal
104	1-27-2013	1-29-2013	35	F	426150	71602244		SEIZURE ATTACK	MED112A	G41.9	104.78	17.6	122.38	Legal
105	1-15-2013	1-24-2013	34	M	424356	39203332		C. ACCIDENT	MED114A	I64	128.18	17.86	146.04	Legal
106	1-24-2013	1-27-2013	15	F	58438	16391446		VASOCLUSIVE CRISIS IN SICKLE CELL DISEASE	MED116A	D57.1	123.11	58.8	181.91	Fraudulent
107	1-13-2013	1-22-2013	20	F	30070	16493692		SICKLE CELL DISEASE WITH VOC	MED116A	D57.1	123.11	85.12	208.23	Fraudulent
108	1-25-2013	1-27-2013	75	F	426022	75246648		ACUTE WATERY DIARH.	MED123A	A09	88.92	18.7	107.62	Legal
109	1-28-2013	1-31-2013	47	F	426124	66799749		ACUTE GASTRO-E.	MED123A	A09	88.92	26.82	115.74	Legal
110	1-27-2013	1-30-2013	45	F	426182	58069345		ACUTE GASTRO-E.	MED123A	A09	88.92	14.56	103.48	Legal
111	1-19-2013	1-26-2013	47	M	412435	79536767		PNEUMONIA	MED130A	J18.9	148.46	120.74	269.2	Legal
112	1-22-2013	1-26-2013	46	F	425469	87236206		PNEUMONIA	MED130A	J18.9	148.46	118.58	267.04	Legal
113	1-22-2013	1-25-2013	7	M	381667	68430832		CELLULITIS OF BOTH LEGS	MED131A	L03.9	63.96	96.4	160.36	Fraudulent
114	1-22-2013	1-29-2013	76	F	392335	16456322		HYPERGLYCAEMIA	MED132A	I10	90.22	221.05	311.27	Fraudulent
115	1-18-2013	1-22-2013	56	M	424953	16506601		DEEP VEIN THROMLOSIS	MED134A	I82.9	133.64	128.1	261.74	Fraudulent
116	1-15-2013	1-23-2013	67	M	310974	65039702		DEEP VEIN THROMLOSIS	MED134A	I82.9	133.64	18.6	152.24	Legal
117	2012-08-12	2013-12-01	66	M	419017	88731803		DEEP VEIN THROMLOSIS	MED134A	I82.9	133.64	585.22	718.86	Fraudulent
118	1-14-2013	1-31-2013	37	M	424269	88112969		RETROVIRAL INFECTION WITH ENCEPHALO	MED138A		158.47	13.95	172.42	Legal
119	2013-03-01	1-13-2013	35	M	420836	76515474		RETROVIRAL INFECTION WITH ENCEPHALO	MED138A		158.47	18.78	177.25	Legal
120	2012-12-14	2012-12-26	44	F	419854	16358598		CELLULITIS R. LEG	MEDI 03A	E14	190.45	369.22	559.67	Fraudulent
121	2012-12-19	2012-12-24	26	M	397987	87239372		HYPERGLYCEMIA	MEDI 03A	E87	190.45	41.98	232.43	Legal
122	2013-01-21	2013-01-24	52	F	414369	78680773		THYRPTOXICOSIS/GOITRE	MEDIO1A	EO4.9	119.86	11.12	130.98	Legal
123	2012-12-28	2013-01-05	82	F	102083	16351075		DIABETIES MELLITUS COM	MEDIO3A	E14.0	190.45	152.24	342.69	Fraudulent
124	2012-12-16	2012-12-24	60	F	158805	16506625		DIABETES MELITU TYPEII	MEDIO3A	E14	190.45	447.76	638.21	Fraudulent
125	2012-12-31	2013-01-05	61	F	420534	44704193		ANAEMIA	MEDIO6A	D57.9	128.83	12.36	141.19	Legal
126	2012-12-23	2012-12-28	67	M	176737	16381336		CONGESTIVE CARDIAC FAILURE	MEDIO7A	I50.9	155.87	15.26	171.13	Legal
127	2012-12-26	2013-01-05	29	F	421537	16360552	GYNAELOGICAL LAPAROTOMY	ECTOPIC GESTATION	OBGY01A	OOO9	292.5	114.08	406.58	Fraudulent
128	2012-12-23	2013-01-01	44	F	420781	23806105	GYNAELOGICAL LAPAROTOMY	ECTOPIC GESTATION	OBGY01A	OOO9	292.5	127.64	420.14	Fraudulent
129	2013-01-07	2013-01-11	42	F	417431	79036723	LAPONOTOMY	OVARIAN CYST	OBGY01A	D27	292.5	94.36	386.86	Fraudulent
130	2013-01-30	2013-01-31	21	F	419881	58166188	SALPINGECTOMY	LEAKING RT ECTOPIC	OBGY01A	OOO9	292.5	101.76	394.26	Fraudulent
131	2012-12-30	2013-01-31	27	F	422004	65572086	LAPORATOMT	RUPTURED ECTOPIC GESTATION	OBGY01A	OOO9	292.5	89.22	381.72	Fraudulent
132	2013-01-18	2013-01-28	36	F	425003	82419434	GYNAECOLOGICAL LAPAROTOMY	RUPTURED EDEMIC PREGNANCY	OBGY01A	OO0.9	292.5	94.92	387.42	Fraudulent
133	2013-01-03	2013-01-26	25	F	336305	55916924	LAPAROTOMY	RETAINED PRODUCT	OBGY01A	OO8.9	292.5	225.78	518.28	Fraudulent
134	2013-01-19	2013-01-24	12	F	425144	32058208	LAPAROTOMY	ECTOPIC PREGNANCY	OBGY01A	OOO.6	292.5	74.92	367.42	Fraudulent
135	2012-12-25	2012-12-31	62	F	420232	40419835	LAPAROTOMY	ENDOMETRIOSIS	OBGY01A	480.9	292.5	73.24	365.74	Fraudulent
136	2012-12-28	2012-12-31	29	F	421650	19597974	GYNAEOLOGICAL LAPARATOMY		OBGY01A	OOO.9	292.5	63.93	356.43	Legal
137	2012-12-28	2012-12-31	29	F	421710	16474159	LAPORATORY	RUPTARED ECTOPIC	OBGY01A	OOO.9	292.5	75.08	367.58	Fraudulent
138	2012-12-21	2012-12-28	30	F	420785	89369383	GYNAEOLOGICAL LAPARATOMY	LEAKING ECTOPIC GESTATION	OBGY01A		292.5	75.34	367.84	Fraudulent
139	2013-01-24	2013-01-27	26	F	425913	69022350		CHRONIC PELVIC PANI	OBGY02A	N.73.9	155.61	5.34	160.95	Legal
140	2013-01-25	2013-01-26	26	F	426043	52957608		PELVIC INFLAMATORY DISEASE	OBGY02A	N.73.9	155.61	12.7	168.31	Legal
141	2013-01-09	2013-01-13	37	F	395728	60865750	CULDOTOMY	PELVIC INFLAMMATORY	OBGY04A	N73.9	78.39	100.18	178.57	Fraudulent
142	2013-01-18	2013-01-24	20	F	425063	70181051	CULDOCENTESIS	PELVIC INFLAMATORY DISEASE	OBGY04A	N.73.9	78.39	117.58	195.97	Fraudulent
143	2012-12-30	2013-01-01	31	F	422087	86706843	E.O.U	THREATENED ABORTION	OBGY06A	OO6	72.8	8.96	81.76	Legal
144	2012-12-31	2013-01-01	20	F	422102	20048764	E.O.U	INCOMPLETE ABORTION	OBGY06A	OO6	72.8	19.3	92.1	Legal
145	2013-01-02	2013-01-04	38	F	386261	19583516	E.O.U	INCOMPLETE ABORTION	OBGY06A	OO6	72.8	11.8	84.6	Legal
146	2013-01-01	2013-01-04	32	F	422354	62017432	E.O.U	INCOMPLETE ABORTION	OBGY06A	OO6	72.8	25.4	98.2	Legal
147	2013-01-02	2013-01-04	27	F	422274	86226432	E.O.U	INCOMPLETE ABORTION	OBGY06A	OO6	72.8	10.6	83.4	Legal
148	2013-01-03	2013-01-05	32	F	420965	80471444	E.O.U	INCOMPLETE ABORTION	OBGY06A	OO6	72.8	13	85.8	Legal
149	2013-01-11	2013-01-13	29	F	212709	19586556	E.O.U	BLIGHTED OVUM	OBGY06A	OO6	72.8	54.1	126.9	Fraudulent
150	2013-01-03	2013-01-06	33	F	419020	37904830	E.O.U	INCOMPLETED ABORTION	OBGY06A	OO6	72.8	109.88	182.68	Fraudulent
151	2013-01-11	2013-01-14	38	F	390132	24730050	E.O.U	BLIGHTED OVUM	OBGY06A	OO6	72.8	15.98	88.78	Legal
152	2013-01-09	2013-01-11	40	F	398581	16511958	E.O.U	INCOMPLETE ABORTION	OBGY06A	OO6	72.8	49.88	122.68	Fraudulent
153	2013-01-07	2013-01-10	23	F	423083	61458505	E.O.U	INCOMPLETE ABORTION	OBGY06A	OO6	72.8	19.02	91.82	Legal
154	2013-01-14	2013-01-15	22	F	418685	88009623	SPONTANEOUS VAGINAL DELIVERY	DELIVERY	OBGY33A	80.9	50.96	2	52.96	Legal
155	2013-01-14	2013-01-15	25	F	419441	62149275	SPONTANEOUS VAGINAL DELIVERY	DELIVERY	OBGY33A	80.9	50.96	2	52.96	Legal
156	2013-01-16	2013-01-17	21	F	421847	82825938	SPONTANEOUS VAGINAL DELIVERY	DELIVERY	OBGY33A	80.9	50.96	3	53.96	Legal
157	2013-01-16	2013-01-16	36	F	418962	84217268	SPONTANEOUS VAGINAL DELIVERY	DELIVERY	OBGY33A	80.9	50.96	6	56.96	Legal
158	2013-01-16	2013-01-16	46	F	303334	46126408	SPONTANEOUS VAGINAL DELIVERY	DELIVERY	OBGY33A	80.9	50.96	8	58.96	Legal
159	2013-01-15	2013-01-16	23	F	423101	78076172	SPONTANEOUS VAGINAL DELIVERY	DELIVERY	OBGY33A	80.9	50.96	8	58.96	Legal
160	2013-01-16	2013-01-17	33	F	424668	81814599	SPONTANEOUS VAGINAL DELIVERY	DELIVERY	OBGY33A	80.9	50.96	4.2	55.16	Legal
161	2013-01-30	2013-01-30	30	F	390432	78183734			OPDC02A	80.9	13.27		13.27	Legal
162	2013-01-30	2013-01-30	28	F	423870	90193809			OPDC02A	80.9	13.27		13.27	Legal
163	2012-12-21	2012-12-21	33	F	0 27300	62616561			OPDC02A	80.9	13.27		13.27	Fraudulent
164	1-14-2013	1-14-2013	16	F	0176-13	16412963	ANTIBIATIC	APICAL PERIODONTITIS	OPDC03A		4.88	1.5	6.38	Fraudulent
165	1-14-2013	1-14-2013	57	M	0187-12	84473657	ANTIBIATIC	APICAL PERIODONTITIS	OPDC03A		4.88	1.5	6.38	Fraudulent
166	1-14-2013	1-14-2013	48	F	1903-11	16539191	CARIES	APICAL PERIODONTITIS	OPDC03A		4.88	1.5	6.38	Fraudulent
167	1-14-2013	1-14-2013	32	M	0171-13	65643315	ANTIBIATIC	APICAL PERIODONTITIS	OPDC03A		4.88	1.5	6.38	Fraudulent
168	1-14-2013	1-14-2013	37	F	3543-12	66064338	ANTIBIATIC	APICAL PERIODONTITIS	OPDC03A		4.88	1.5	6.38	Fraudulent
169	1-14-2013	1-14-2013	44	F	1145-12	16417498	ANTIBIATIC	APICAL PERIODONTITIS	OPDC03A		4.88	1.5	6.38	Fraudulent
170	1-14-2013	1-14-2013	6	F	0178-12	16440432	ANTIBIATIC	CARIES	OPDC03A		4.88	2.3	7.18	Fraudulent
171	1-14-2013	1-14-2013	54	F	0173-12	16472233	ANTIBIATIC	APICAL PERIODONTITIS	OPDC03A		4.88	15.96	20.84	Fraudulent
172	2013-02-01	2013-02-01	70	M	6020-12	1652590	ANTIBIATIC	APICAL PERIODONTITIS	OPDC03A		4.88	1.5	6.38	Fraudulent
173	2013-02-01	2013-02-01	27	M	0013-13	74081926	ANTIBIATIC	PERIODONTITIS	OPDC03A		4.88	14.3	19.18	Fraudulent
174	2013-02-01	2013-02-01	29	F	0014-13	16358559	ANTIBIATIC	CARIES	OPDC03A		4.88	1.5	6.38	Fraudulent
175	2013-02-01	2013-02-01	62	M	0022-13	69952060	ANTIBIATIC	CARIES	OPDC03A		4.88	1.5	6.38	Fraudulent
176	2013-02-01	2013-02-01	28	M	2019-12-09	76592382	ANTIBIATIC	CARIES	OPDC03A		4.88	1.5	6.38	Fraudulent
177	1-14-2013	1-14-2013	27	M	0010-13	66621249	ANTIBIATIC	CARIES	OPDC03A		4.88	1.5	6.38	Fraudulent
178	2013-04-01	2013-04-01	4	F	0054-13	85299862	ANTIBIATIC	CARIES	OPDC03A		4.88	8	12.88	Fraudulent
179	2013-04-01	2013-04-01	5	M	0081-13	81878067	ANTIBIATIC	CARIES	OPDC03A		4.88	8	12.88	Fraudulent
180	2013-01-31	2013-01-31	39	F	418692	16516670			OPDC02A	80.9	13.27		13.27	Legal
181	2013-01-23	2013-01-23	20	F	421887	89947056			OPDC02A	80.9	13.27		13.27	Legal
182	2012-12-21	2012-12-21	33	F	0 27300	62616561			OPDC02A	80.9	13.27		13.27	Fraudulent
183	1-14-2013	1-14-2013	16	F	0176-13	16412963	ANTIBIATIC	APICAL PERIODONTITIS	OPDC03A		4.88	1.5	6.38	Fraudulent
184	1-14-2013	1-14-2013	57	M	0187-12	84473657	ANTIBIATIC	APICAL PERIODONTITIS	OPDC03A		4.88	1.5	6.38	Fraudulent
185	1-14-2013	1-14-2013	48	F	1903-11	16539191	CARIES	APICAL PERIODONTITIS	OPDC03A		4.88	1.5	6.38	Fraudulent
186	1-14-2013	1-14-2013	32	M	0171-13	65643315	ANTIBIATIC	APICAL PERIODONTITIS	OPDC03A		4.88	1.5	6.38	Fraudulent
187	1-14-2013	1-14-2013	37	F	3543-12	66064338	ANTIBIATIC	APICAL PERIODONTITIS	OPDC03A		4.88	1.5	6.38	Fraudulent
188	1-14-2013	1-14-2013	44	F	1145-12	16417498	ANTIBIATIC	APICAL PERIODONTITIS	OPDC03A		4.88	1.5	6.38	Fraudulent
189	1-14-2013	1-14-2013	6	F	0178-12	16440432	ANTIBIATIC	CARIES	OPDC03A		4.88	2.3	7.18	Fraudulent
190	1-14-2013	1-14-2013	54	F	0173-12	16472233	ANTIBIATIC	APICAL PERIODONTITIS	OPDC03A		4.88	15.96	20.84	Fraudulent
191	2013-02-01	2013-02-01	70	M	6020-12	1652590	ANTIBIATIC	APICAL PERIODONTITIS	OPDC03A		4.88	1.5	6.38	Fraudulent
192	2013-02-01	2013-02-01	27	M	0013-13	74081926	ANTIBIATIC	PERIODONTITIS	OPDC03A		4.88	14.3	19.18	Fraudulent
193	2013-02-01	2013-02-01	29	F	0014-13	16358559	ANTIBIATIC	CARIES	OPDC03A		4.88	1.5	6.38	Fraudulent
194	2013-02-01	2013-02-01	62	M	0022-13	69952060	ANTIBIATIC	CARIES	OPDC03A		4.88	1.5	6.38	Fraudulent
195	2013-02-01	2013-02-01	28	M	2019-12-09	76592382	ANTIBIATIC	CARIES	OPDC03A		4.88	1.5	6.38	Fraudulent
196	1-14-2013	1-14-2013	27	M	0010-13	66621249	ANTIBIATIC	CARIES	OPDC03A		4.88	1.5	6.38	Fraudulent
197	2013-04-01	2013-04-01	4	F	0054-13	85299862	ANTIBIATIC	CARIES	OPDC03A		4.88	8	12.88	Fraudulent
198	2013-04-01	2013-04-01	5	M	0081-13	81878067	ANTIBIATIC	CARIES	OPDC03A		4.88	8	12.88	Fraudulent
199	12-26-2012	12-26-2012	2	F	413775	80014341			OPDC06C		5.98	2.9	8.88	Legal
200	12-26-2012	12-26-2012	13	F	421483	67789679			OPDC06C		5.98	0.2	6.18	Legal
201	12-26-2012	12-26-2012	2	F	421482	65478384			OPDC06C		5.98	10.13	16.11	Fraudulent
202	12-28-2012	12-28-2012	1	M	421742	67261041			OPDC06C		5.98	2	7.98	Legal
203	12-28-2012	12-28-2012	2	F	421776	65947745			OPDC06C		5.98	8	13.98	Fraudulent
204	12-28-2012	12-28-2012	10	F	421673	81913973			OPDC06C		8.78	1.33	10.11	Legal
205	12-28-2012	12-28-2012	1	M	421768	83481430			OPDC06C		8.78	3.5	12.28	Legal
206	2012-08-10	2012-08-10	1	M	372938	78531335			OPDC06C		5.98		5.98	Legal
207	2012-11-12	2012-11-12	10	F	221041	16485517			OPDC06C		5.98	1.33	7.31	Fraudulent
208	2012-12-28	2012-12-30	64	M	421574	15547673		HYPERTENSION	OPDC0A	I10	90.22		90.22	Fraudulent
209	2012-12-24	2012-12-28	43	M	418464	89313091		CEREBRO VASCULAR ACCIDENT	OPDC0A	I64	128.18	84	212.18	Fraudulent
210	2012-11-28	2012-12-26	50	F	417232	88526955	INCISION DAMAGE&DEBRIDEMENT	CELLULITIS RT LEG	OPDC0A	LO3.9	141.44	309.22	450.66	Fraudulent
211	2013-11-01	2013-11-01	42	M	0153-13	46951744	ANTIBIATIC	DENTOALVEOLAR	OPDOC3A		4.88	4.88	9.76	Legal
212	2013-11-01	2013-11-01	34	F	0162-12	81753790	ANTIBIATIC	APICAL PERIODONTITIS	OPDOC3A		4.88	15.96	20.84	Fraudulent
213	2013-11-01	2013-11-01	55	M	48561-12	16531536	ANTIBIATIC	APICAL PERIODONTITIS	OPDOC3A		4.88	5.96	10.84	Legal
214	2013-11-01	2013-11-01	41	F	0152-13	64475045	ANTIBIATIC	DENTOALVEOLAR	OPDOC3A		4.88	15.96	20.84	Fraudulent
215	2013-11-01	2013-11-01	52	M	0154-13	16809210	CANULLTAL	CARIES	OPDOC3A		4.88	5.4	10.28	Legal
216	2013-07-01	2013-07-01	8	M	0085-12	16393330	MEDICATION	APICAL PERIODONTITIS	OPDOC3A		4.88	8.63	13.51	Fraudulent
217	2013-07-01	2013-07-01	30	F	0066-13	16462033	ANTIBIATIC	CARIES	OPDOC3A		4.88	1.5	6.38	Legal
218	2013-07-01	2013-07-01	84	F	0068-13	16493572	ANTIBIATIC	CARIES	OPDOC3A		4.88	1.5	6.38	Legal
219	2013-08-01	2013-08-01	22	F	0107-13	16421444	ANTIBIATIC	PERIODONTITIS	OPDOC3A		4.88	5.42	10.3	Legal
220	2013-12-01	2013-12-01	53	F	421319	66845996	BANDAGING	FRACTURED	ORTH01A		38.48		38.48	Legal
221	12-20-2012	12-20-2012	30	F	420584	45796631	BANDAGING		ORTH01A		38.48		38.48	Legal
222	12-24-2012	12-24-2012	53	M	311009	66208775	BANDAGING	FRACTURE	ORTH01A		49.14		49.14	Legal
223	1-25-2013	1-25-2013	54	F	425198	82799732	BANDAGING	FIBULA FRACTURE	ORTH01C		36.14		36.14	Legal
224	1-24-2013	1-24-2013	62	M	425897	16495533	BANDAGING	COLLIES FRACYURE	ORTH01C		36.14		36.14	Legal
225	2013-07-01	2013-07-01	49	M	421304	63369414	BANDAGING	FRACTURED	ORTH01C		36.14		36.14	Legal
226	2013-04-01	2013-04-01	12	M	422807	16439100	BANDAGING	FRACTURED	ORTH01C		36.14	0.41	36.55	Legal
227	1-29-2013	1-29-2013	71	F	1009499	16473134	BANDAGING	FRACTURED	ORTH01C		46.02		46.02	Legal
228	1-29-2013	1-29-2013	8	M	422156	16458870	BANDAGING		ORTH01C		46.02		46.02	Legal
229	1-28-2013	1-28-2013	7	M	426095	38061628	BANDAGING		ORTH01C		46.02		46.02	Legal
230	1-29-2013	1-29-2013	3	M	342118	71868280	BANDAGING		ORTH01C		46.02		46.02	Legal
231	2013-11-01	2013-11-01	27	M	423902	86691577	BANDAGING	MODERATE HEAD INJURY	ORTH01C		38.48		38.48	Legal
232	1-14-2013	1-14-2013	24	M	424054	68436899	BANDAGING	RIGHT ACETABULAR FRACTURE	ORTH01C		36.14		36.14	Legal
233	12-27-2012	12-27-2012	22	M	421625	82634617	BANDAGING		ORTH01C		36.14		36.14	Legal
234	12-24-2012	12-24-2012	47	M	405648	81940438	BANDAGING		ORTH01C		46.02		46.02	Legal
235	11-22-2012	11-22-2012	7	M	416590	67741157	BANDAGING		ORTH01C		46.02	3.4	49.42	Legal
236	11-19-2012	11-19-2012	27	M	416227	80644823	BANDAGING		ORTH01C		36.14	0.35	36.49	Legal
237	2013-03-01	2013-03-01	55	F	4201830	16507995	CLOSED REDUCTION	DISPLACE RADAIL	ORTH04A		244.01		244.01	Fraudulent
238	12-22-2012	12-22-2012	54	F	420830	16507995	CLOSED REDUCTION	RT RAPLIAL	ORTH04A		244.01		244.01	Fraudulent
239	12-24-2012	12-24-2012	61	F	337859	73893215	CLOSED REDUCTION	TIBIA FRACTURE	ORTH04A		340.99		340.99	Legal
240	12-22-2012	12-22-2012	37	F	418957	16429615	CLOSED REDUCTION		ORTH04A		340.99		340.99	Legal
241	2012-06-12	2012-06-12	2	F	306735	84559868	CLOSED REDUCTION OF FRACTURE	FRACTURE	ORTH04C		205.66		205.66	Legal
242	1-26-2013	1-26-2013	33	M	426121	82379615	DRESSING	LAC LT EYE BOW	ORTH06A		19.5	30.94	50.44	Fraudulent
243	2013-04-01	2013-04-01	44	M	421298	82397333	DRESSING		ORTH06A		17.16	69.26	86.42	Fraudulent
244	1-19-2012	1-19-2012	49	F	414637	52744005	CLOSED REDUCTION		ORTH06A		17.16	2.02	19.18	Legal
245	11-29-2012	11-29-2012	30	M	417769	83297840	DRESSING	MULTIPLE ABRASIAN	ORTH06A		17.16		17.16	Legal
246	2013-01-04	2013-01-14	9	F	419752	84807161		MALNUTRITION	PAED05C	E43	98.93	3.46	102.39	Legal
247	2013-01-04	2013-01-12	10	F	399456	17619706		ANAMIA	PAED06C	D51.9	113.62	24.2	137.82	Legal
248	2013-01-03	2013-01-07	1	F	422577	75307310		SEVERE ANAEMIA	PAED06C	D50.9	113.62	1.3	114.92	Legal
249	2013-01-18	2013-01-20	2	M	425043	76533007		SEVERE ANAEMIA	PAED06C	D50.9	113.62	15.28	128.9	Legal
250	2012-12-30	2013-01-01	3	F	422231	89166022		NEONATAL JUNCDICE	PAED09C	P59.9	125.32	4.68	130	Legal
251	2013-01-12	2013-01-15	4	F	423969	69636535		NEONATAL JEURDURY	PAED09C	125.32	125.32	0.7	126.02	Legal
252	2013-01-21	2013-01-21	5	F	425394	87149399		NECRATAL SANDICE	PAED09C	P59.9	125.32		125.32	Legal
253	2012-12-05	2012-12-07	1	F	418577	56181479		NEONATAL JAUNDICE	PAED09C	P59.9	125.32		125.32	Legal
254	2012-11-23	2012-11-29	8	F	416538	88412826		HAEMOPERITONEUM	PAED09C	K66.1	204.88	220.91	425.79	Fraudulent
255	2013-01-03	2013-01-11	5DY	F	422677	83010443		NEONATAL JAUNDICE	PAED09H	P59.9	125.32	8.7	134.02	Fraudulent
256	2013-01-05	2013-01-07	1	F	422810	82971515		PRETERM	PAED10C	PO7.3	197.34	2.65	199.99	Legal
257	2013-01-02	2013-01-07	2	F	418167	87466621		PRETERM	PAED10C	PO7.4	197.34	1.4	198.74	Fraudulent
258	2013-01-28	2013-01-30	1	F	426691	84232128		NEAR TERM NEONATE	PAED10C		197.34	2.65	199.99	Legal
259	2013-01-03	2013-01-05	3	F	418201	58201183		LEFT HEART ABSCESS	PAED10C		197.34	3.95	201.29	Legal
260	2013-01-08	2013-01-17	1	F	422371	89592971		PREMATURITY	PAED10C	P07.3	197.34	3.65	200.99	Legal
261	2013-01-17	2013-01-24	1	F	420665	87257207		PREMATURITY	PAED10C	P07.0	197.34	3.3	200.64	Legal
262	2013-01-22	2013-01-29	1	F	426149	16351012		LOW BIRTH WEIGHT	PAED10C	PO7.0	197.34	2.65	199.99	Legal
263	2013-01-10	2013-01-13	4	F	423575	84849302		HAOMORRAGIC DISEASE	PAED10C		197.34	3.1	200.44	Legal
264	2013-01-21	2013-01-28	2	F	418167	87466621		PREMATURITY	PAED10C	PO7.2	197.34	3.8	201.14	Fraudulent
265	2012-12-30	2013-01-05	8	M	422059	81726046		ANAEMIA	PAEDO6C	D51.9	155.48	26.96	182.44	Legal
266	2013-01-12	2013-01-18	4	F	119243	16853970		BURNS	PSUR27C	T30.0	644.15	61.57	705.72	Legal
267	1-27-2013	1-27-2013	76	F	426194	16469174			ZOOM02A		13.03	8.35	21.38	Fraudulent
268	1-30-2013	1-30-2013	75	F	426664	59827482			ZOOM02A		13.03	10.32	23.35	Fraudulent
269	1-30-2013	1-30-2013	55	F	79099	56381662			ZOOM02A		8.66		8.66	Legal
270	1-29-2013	1-29-2013	41	M	426606	67925241			ZOOM02A		13.03	8	21.03	Fraudulent
271	1-31-2013	1-31-2013	49	F	401863	56855371			ZOOM02A		8.66	84	92.66	Fraudulent
272	2013-01-01	2013-01-01	2	M	422320	80418870			ZOOM02C		11.48	12.9	24.38	Fraudulent
273	2013-07-01	2013-07-01	2	M	423187	70495368			ZOOM02C		11.48	8.6	20.08	Fraudulent
274	2013-08-01	2013-08-01	3	M	316240	64113576			ZOOM02C		11.48	21.76	33.24	Fraudulent
275	2013-01-01	2013-01-01	1	F	423628	64242432			ZOOM02C		11.48	15.16	26.64	Fraudulent
276	2013-08-01	2013-08-01	3	M	416408	60731306			ZOOM02C		11.48	12	23.48	Fraudulent
277	1-16-2013	1-16-2013	7	M	305129	64243654			ZOOM02C		11.48	20.77	32.25	Fraudulent
278	1-15-2013	1-15-2013	6	F	393359	67285625			ZOOM02C		7.6	25.72	33.32	Fraudulent
279	1-15-2013	1-15-2013	8	F	93779	16432639			ZOOM02C		7.6	25.53	33.13	Fraudulent
280	1-16-2013	1-16-2013	6	F	3903901	86496649			ZOOM02C		7.6	7.06	14.66	Legal
281	1-16-2013	1-16-2013	1	M	424652	74833403			ZOOM02C		7.6	38.56	46.16	Fraudulent
282	1-16-2013	1-16-2013	1	F	423207	10767418			ZOOM02C		7.6	29.92	37.52	Fraudulent
283	2013-07-01	2013-07-01	6	M	145894	50453668			ZOOM02C		7.6	4.36	11.96	Legal
284	1-23-2013	1-23-2013	4	F	244118	52140129			ZOOM02C		7.6		7.6	Legal
285	1-23-2013	1-23-2013	6	F	244744	37343282			ZOOM02C		7.6	25.45	33.05	Fraudulent
286	1-24-2013	1-24-2013	12	F	425917	76001477			ZOOM02C		7.66	6.9	14.56	Legal
287	1-26-2013	1-26-2013	3	M	413112	76101255			ZOOM02C		7.6	7	14.6	Legal
288	1-22-2013	1-22-2013	2	M	389991	77736668			ZOOM02C		11.48	18.28	29.76	Fraudulent
289	1-13-2013	1-13-2013	2	F	424063	84392113			ZOOM02C		11.48	2.33	13.81	Legal
290	1-15-2013	1-15-2013	2	F	303027	82310829			ZOOM02C		7.6	5.69	13.29	Legal
291	2013-10-01	2013-10-01	1	F	423561	81556665			ZOOM02C		11.48	16.23	27.71	Fraudulent
292	1-24-2013	1-24-2013	6	M	320568	60207068			ZOOM02C		7.6	17.98	25.58	Fraudulent
293	1-25-2013	1-25-2013	9	M	408372	87745792			ZOOM02C		7.6	14.4	22	Fraudulent
294	1-21-2013	1-21-2013	10	F	221041	16485517			ZOOM02C		7.6	4	11.6	Fraudulent
295	2013-11-01	2013-11-01	80	F	358726	53377406			ZOOMO2A		13.03		13.03	Legal
296	2013-01-01	2013-01-01	46	M	422260	66383837			ZOOMO2A		8.66	22.3	30.96	Fraudulent
297	2013-01-01	2013-01-01	70	M	421590	86752903			ZOOMO2A		8.66	79.82	88.48	Fraudulent
298	2013-07-01	2013-07-01	35	F	416192	82057154			ZOOMO2A		8.66	0.18	8.84	Legal
299	2013-07-01	2013-07-01	80	F	423066	16418410			ZOOMO2A		8.66		8.66	Legal
300	2013-01-08	2013-01-10	18	F	423260	69264801	HERMORRHAPHY	STRANGULATED FERNORAL HERNIA	ASUR19A	K46.9	267.8	48.34	316.14	Fraudulent
